# Supplementary material for: Genome-wide analysis of PRR gene family uncovers their roles in circadian rhythmic changes and response to drought stress in Gossypium hirsutum L
Source: PeerJ. 2020 Sep 25;8:e9936. doi: 10.7717/peerj.9936 (PMC7521341; doi:10.7717/peerj.9936)
Supplement: Supplemental Information 5 [file peerj-08-9936-s005.xlsx]

## Sheet:  Suppl Table S2
Table S2:Rename information of PRRs
Arabidopsis		G. arboreum		G. hirsutum		G. raimondii		G.barbadense		T. cacao			O. sativa
Gene ID	Proposed names	Gene ID	Proposed names	Gene ID	Proposed names	Gene ID	Proposed names	Gene ID	Proposed names	Gene ID		Proposed names	Gene ID	Proposed names
AT5G61380.1	AtPRR1	Ga01G1961.1	GaPRR1a	Gh_A03G0597	GhPRR1a	Gorai.003G098300.1	GrPRR1a	GB_D03G1099.1	GbPRR1a	Thecc1EG014102t1		TheccPRR1	Os02t0618200-01	OsPRR1
AT5G60100.1	AtPRR3	Ga05G1056.1	GaPRR3a	Gh_D03G0885	GhPRR1b	Gorai.005G145700.1	GrPRR1b	GB_A03G0809.1	GbPRR1b	Thecc1EG043038t1		TheccPRR3	Os03t0284100-01	OsPRR73
AT5G24470.1	AtPRR5	Ga11G0061.1	GaPRR3b	Gh_A09G1502	GhPRR3a	Gorai.007G317900.1	GrPRR1c	GB_D11G0159.1	GbPRR5a	Thecc1EG015513t1		TheccPRR5	Os07t0695100-01	OsPRR37
AT5G02810.1	AtPRR7	Ga11G3967.1	GaPRR5a	Gh_A11G2902	GhPRR3b	Gorai.001G126800.1	GrPRR1d	GB_A11G0159.1	GbPRR5b	Thecc1EG022066t1		TheccPRR7a	Os09t0532400-01	OsPRR95
AT2G46790.1	AtPRR9	Ga12G0334.1	GaPRR5b	Gh_D09G1513	GhPRR3c	Gorai.007G374800.1	GrPRR3a	GB_A05G4460.1	GbPRR5c	Thecc1EG041985t1		TheccPRR7b	Os11t0157600-01	OsPRR59
		Ga04G2138.1	GaPRR5c	Gh_D11G3288	GhPRR3d	Gorai.007G017100.1	GrPRR5a	GB_A05G1016.1	GbPRR7a	Thecc1EG005034t1		TheccPRR9
		Ga09G1818.1	GaPRR7a	Gh_A11G0142	GhPRR5a	Gorai.012G001000.1	GrPRR5b	GB_D05G0992.1	GbPRR7b
		Ga14G0269.1	GaPRR7b	Gh_A12G2229	GhPRR5b	Gorai.008G265100.1	GrPRR5c	GB_D04G0887.1	GbPRR7c
		Ga11G2989.1	GaPRR9a	Gh_D11G0156	GhPRR5c	Gorai.009G103700.1	GrPRR7a	GB_A05G3674.1	GbPRR7d
				Gh_D12G2716	GhPRR5d	Gorai.007G113000.1	GrPRR9a
				Gh_A05G0856	GhPRR7a
				Gh_A05G2996	GhPRR7b
				Gh_D05G3868	GhPRR7c
				Gh_D04G0791	GhPRR7d
				Gh_A11G0920	GhPRR9a
				Gh_D11G3525	GhPRR9b
The homology information of PRR sequences between Arabidopsis and Gossypium spp.
Arabidopsis	G. arboreum	E-value	identity percentage(%)	coverage percentage(%)	Arabidopsis	G. hirsutum	E-value	identity percentage(%)	coverage percentage(%)
AtPRR1	GaPRR1a	2.51 × 10-180	49.92	81.18	AtPRR1	GhPRR1a	4.23 × 10-179	49.77	81.18
AtPRR3	GaPRR3a	4.05 × 10-96	44.19	85.84	AtPRR1	GhPRR1b	1.94 × 10-173	49.14	81.18
AtPRR3	GaPRR3b	8.74 × 10-82	41.35	81.12	APRR7	GhPRR3a	0.00 × 10+00	51.18	87.66
AtPRR5	GaPRR5a	1.84 × 10-140	43.33	86.67	APRR7	GhPRR3b	0.00 × 10+00	48.51	90.11
AtPRR5	GaPRR5b	8.07 × 10-139	42.6	76.49	APRR7	GhPRR3c	0.00 × 10+00	54	88.67
AtPRR5	GaPRR5c	1.15 × 10-132	41.55	79.69	APRR7	GhPRR3d	0.00 × 10+00	48.57	90.31
AtPRR7	GaPRR7a	0.00 × 10+00	49.22	86.16	APRR5	GhPRR5a	1.45 × 10-139	44.22	84.98
AtPRR7	GaPRR7b	4.77 × 10-165	45.37	90.32	APRR5	GhPRR5b	1.20 × 10-131	40.98	78.59
AtPRR9	GaPRR9a	6.28 × 10-79	43.58	88.32	APRR5	GhPRR5c	3.55 × 10-141	43.08	84.91
					APRR5	GhPRR5d	3.73 × 10-136	41.44	78.59
					AtPRR3	GhPRR7a	9.49 × 10-95	43.76	85.84
					AtPRR3	GhPRR7b	1.94 × 10-88	43.74	83.3
					AtPRR3	GhPRR7c	1.01 × 10-83	44	85.47
					APRR3	GhPRR7d	1.37 × 10-89	44.49	83.37
					APRR9	GhPRR9a	6.89 × 10-102	39.96	83.11
					APRR9	GhPRR9b	2.37 × 10-77	39.79	83.67
Arabidopsis	G. raimondii	E-value	identity percentage(%)	coverage percentage(%)	Arabidopsis	G.barbadense	E-value	identity percentage(%)	coverage percentage(%)
AtPRR1	GrPRR1a	1.50 × 10-173	49.14	81.18	AtPRR1	GbPRR1a	4.50 × 10-179	49.77	81.18
AtPRR1	GrPRR1b	1.44 × 10-158	44.57	90.08	AtPRR1	GbPRR1b	2.17 × 10-172	48.99	81.18
AtPRR1	GrPRR1c	1.59 × 10-96	44.42	85.47	AtPRR5	GbPRR5a	4.94 × 10-142	43.24	84.91
AtPRR1	GrPRR1d	1.12 × 10-95	43.97	85.84	AtPRR5	GbPRR5b	2.30 × 10-141	43.4	86.96
AtPRR3	GrPRR3a	9.58 × 10-83	42.47	81.8	AtPRR5	GbPRR5c	4.07 × 10-146	42.99	77.66
AtPRR5	GrPRR5a	1.73 × 10-146	42.99	77.66	AtPRR7	GbPRR7a	0.00 × 10+00	54	88.67
AtPRR5	GrPRR5b	2.93 × 10-14	42.77	84.91	AtPRR7	GbPRR7b	0.00 × 10+00	51.44	87.66
AtPRR5	GrPRR5c	1.04 × 10-137	40.89	78.71	AtPRR7	GbPRR7c	0.00 × 10+00	48.21	90.25
AtPRR7	GrPRR7a	1.00 × 10-139	43.02	89.06	AtPRR7	GbPRR7d	3.95 × 10-167	46.82	89.67
AtPRR9	GrPRR9a	5.21 × 10-78	31.25	82.86
