# Supplementary material for: Genome-wide analysis of PRR gene family uncovers their roles in circadian rhythmic changes and response to drought stress in Gossypium hirsutum L
Source: PeerJ. 2020 Sep 25;8:e9936. doi: 10.7717/peerj.9936 (PMC7521341; doi:10.7717/peerj.9936)
Supplement: Supplemental Information 6 [file peerj-08-9936-s006.xlsx]

## Sheet:  Suppl Table S3
Table S3: The general information of the PRR gene family
Gene name	Gene ID	Species	Assembly	Chromosome	Start	End	Strand	Gene length (bp)	CDS length (bp)	Protein length (aa)	Molecular Weight (kDa)	Isoelectric Point	Grand Average of Hydropathy	Transcript Length (bp)	CDS GC Content (%)	Exon Number	Mean Exon Length (bp)	Mean Intron Length (bp)	Subcellular localization
GhPRR1a	Gh_A03G0597	Gossypium hirsutum	NAU	A03	16466147	16470606	+	4460	1659	552	61.872	5.659	-0.755	1659	43.4	6	276.5	560.2	Nuclear
GhPRR1b	Gh_D03G0885	Gossypium hirsutum	NAU	D03	30503938	30508172	+	4235	1659	552	61.961	5.812	-0.743	1659	43.5	6	276.5	515.2	Nuclear
GhPRR3a	Gh_A09G1502	Gossypium hirsutum	NAU	A09	68181469	68186686	-	5218	2388	795	85.928	8.152	-0.685	2388	42.6	8	298.5	404.3	Nuclear
GhPRR3b	Gh_A11G2902	Gossypium hirsutum	NAU	A11	92952366	92956722	+	4357	2295	764	82.536	7.265	-0.689	2295	43.7	8	286.9	294.6	Nuclear
GhPRR3c	Gh_D09G1513	Gossypium hirsutum	NAU	D09	42607871	42613014	-	5144	2364	787	85.304	7.488	-0.677	2364	42.8	8	295.5	397.1	Nuclear
GhPRR3d	Gh_D11G3288	Gossypium hirsutum	NAU	D11	65800755	65810170	+	9416	2244	747	80.814	8.422	-0.699	2244	43.8	8	280.5	1024.6	Nuclear
GhPRR5a	Gh_A11G0142	Gossypium hirsutum	NAU	A11	1413165	1417008	+	3844	1740	579	64.035	6.885	-0.689	1740	43.9	9	193.3	263	Nuclear
GhPRR5b	Gh_A12G2229	Gossypium hirsutum	NAU	A12	85023260	85026140	-	2881	1920	639	71.519	7.082	-0.7	1920	41.8	8	240	137.3	Nuclear
GhPRR5c	Gh_D11G0156	Gossypium hirsutum	NAU	D11	1396841	1400686	+	3846	1905	634	70.132	7.681	-0.696	1905	43.9	8	238.1	277.3	Nuclear
GhPRR5d	Gh_D12G2716	Gossypium hirsutum	NAU	scaffold4582_D12	40918	43788	-	2871	1914	637	71.06	7.107	-0.734	1914	42.1	8	239.3	136.7	Nuclear
GhPRR7a	Gh_A05G0856	Gossypium hirsutum	NAU	A05	8539117	8543775	-	4659	2142	713	78.289	7.529	-0.715	2142	43.4	12	178.5	228.8	Nuclear
GhPRR7b	Gh_A05G2996	Gossypium hirsutum	NAU	A05	74549726	74554235	-	4510	2247	748	81.363	8.125	-0.739	2247	43.6	8	280.9	323.3	Nuclear
GhPRR7c	Gh_D05G3868	Gossypium hirsutum	NAU	scaffold4074_D05	15138	18954	-	3817	2097	698	76.574	6.825	-0.71	2097	43.3	11	190.6	172	Nuclear
GhPRR7d	Gh_D04G0791	Gossypium hirsutum	NAU	D04	16914013	16918526	-	4514	2265	754	82.179	7.977	-0.67	2265	43.5	8	283.1	321.3	Nuclear
GhPRR9a	Gh_A11G0920	Gossypium hirsutum	NAU	A11	9789154	9793114	+	3961	1965	654	73.213	4.968	-0.681	1965	42.7	9	218.3	249.5	Nuclear
GhPRR9b	Gh_D11G3525	Gossypium hirsutum	NAU	scaffold4566_D11	30373	34322	-	3950	1959	652	72.859	5.804	-0.615	1959	42.4	9	217.7	248.9	Nuclear
GaPRR1a	Ga01G1961	Gossypium arboreum	CRI	Chr01	94032769	94037038	-	4270	1659	552	61.846	5.659	-0.749	1659	43.3	6	276.5	522.2	Nuclear
GaPRR7a	Ga05G1056	Gossypium arboreum	CRI	Chr05	9133751	9137558	-	3808	2094	697	76.611	7.413	-0.717	2094	43.1	11	190.4	171.4	Nuclear
GaPRR5a	Ga11G3967	Gossypium arboreum	CRI	Chr11	123010485	123014335	-	3851	1905	634	69.949	6.961	-0.644	1905	44	8	238.1	278	Nuclear
GaPRR5b	Ga12G0334	Gossypium arboreum	CRI	Chr12	2755929	2758787	+	2859	1893	630	70.673	7.676	-0.716	1893	41.4	8	236.6	138	Nuclear
GaPRR5c	Ga04G2138	Gossypium arboreum	CRI	Chr04	98443682	98447483	-	3802	2118	705	78.421	7.709	-0.676	2118	42.1	8	264.8	240.6	Nuclear
GaPRR3a	Ga09G1818	Gossypium arboreum	CRI	Chr09	75862482	75867717	-	5236	2376	791	85.678	8.031	-0.675	2376	42.6	8	297	408.6	Nuclear
GaPRR3b	Ga11G0061	Gossypium arboreum	CRI	Chr11	376541	380898	-	4358	2259	752	81.268	7.389	-0.687	2259	43.5	9	251	262.4	Nuclear
GaPRR7b	Ga14G0269	Gossypium arboreum	CRI	tig00001759	21689	25772	-	4084	2259	752	81.719	7.734	-0.719	2259	43.6	8	282.4	260.7	Nuclear
GaPRR9a	Ga11G2989	Gossypium arboreum	CRI	Chr11	114043466	114047435	-	3970	1965	654	73.29	5.017	-0.697	1965	42.8	9	218.3	250.6	Nuclear
GrPRR1a	Gorai.003G098300	Gossypium raimondii	JGI	Chr03	30484189	30489639	+	5451	1659	552	61.879	5.812	-0.757	2680	43.8	7	382.9	441.2	Nuclear
GrPRR1b	Gorai.005G145700	Gossypium raimondii	JGI	Chr05	39499880	39500880	+	1001	333	110	12.886	9.657	-0.035	656	41.7	3	218.7	172.5	Nuclear
GrPRR1c	Gorai.007G317900	Gossypium raimondii	JGI	Chr07	53267769	53269409	-	1641	330	109	12.626	8.486	0.044	1291	42.4	3	430.3	175	Nuclear
GrPRR1d	Gorai.001G126800	Gossypium raimondii	JGI	Chr01	15919057	15922086	-	3030	213	70	8.416	10.979	-0.254	939	43.7	5	187.8	522.8	Nuclear
GrPRR5a	Gorai.007G017100	Gossypium raimondii	JGI	Chr07	1308179	1312663	+	4485	1905	634	70.175	7.152	-0.705	2535	44.1	8	316.9	278.6	Nuclear
GrPRR5b	Gorai.012G001000	Gossypium raimondii	JGI	Chr12	123323	127833	+	4511	2118	705	78.569	8.423	-0.699	2812	42.6	8	351.5	242.7	Nuclear
GrPRR5c	Gorai.008G265100	Gossypium raimondii	JGI	Chr08	54446634	54450113	-	3480	1911	636	71.008	7.367	-0.748	2308	42	8	288.5	137	Nuclear
GrPRR3a	Gorai.007G374800	Gossypium raimondii	JGI	Chr07	60664664	60670240	+	5577	2244	747	80.801	7.868	-0.689	3128	43.8	10	312.8	272	Nuclear
GrPRR7a	Gorai.009G103700	Gossypium raimondii	JGI	Chr09	7501704	7508434	-	6731	2097	698	76.645	6.628	-0.699	2754	43.2	13	211.8	331.4	Nuclear
GrPRR9a	Gorai.007G113000	Gossypium raimondii	JGI	Chr07	8758504	8763503	+	5000	1962	653	72.904	5.351	-0.631	2322	42.5	9	258	249.4	Nuclear
GbPRR1a	GB_D03G1099	Gossypium barbadense	ZJU	D03	37972193	37976475	+	4283	1659	552	61.942	5.789	-0.742	1659	43.2	6	276.5	524.8	Nuclear
GbPRR1b	GB_A03G0809	Gossypium barbadense	ZJU	A03	17434534	17438802	+	4269	1659	552	61.872	5.659	-0.755	1659	43.4	6	276.5	522	Nuclear
GbPRR5a	GB_D11G0159	Gossypium barbadense	ZJU	D11	1405372	1409218	+	3847	1905	634	70.145	7.848	-0.705	1905	44	8	238.1	277.4	Nuclear
GbPRR5b	GB_A11G0159	Gossypium barbadense	ZJU	A11	1540231	1544074	+	3844	1905	634	70.052	7.114	-0.65	1905	43.9	8	238.1	277	Nuclear
GbPRR5c	GB_A05G4460	Gossypium barbadense	ZJU	A05	107523167	107526983	-	3817	2118	705	78.623	8.425	-0.71	2118	42.6	8	264.8	242.7	Nuclear
GbPRR7a	GB_A05G1016	Gossypium barbadense	ZJU	A05	9332068	9335673	-	3606	1986	661	72.112	7.138	-0.651	1986	43.6	10	198.6	180	Nuclear
GbPRR7b	GB_D05G0992	Gossypium barbadense	ZJU	D05	8306675	8310491	-	3817	2097	698	76.604	6.825	-0.711	2097	43.3	11	190.6	172	Nuclear
GbPRR7c	GB_D04G0887	Gossypium barbadense	ZJU	D04	16733644	16738155	-	4512	2265	754	82.107	8.009	-0.682	2265	43.7	8	283.1	321	Nuclear
GbPRR7d	GB_A05G3674	Gossypium barbadense	ZJU	A05	81908576	81915050	-	6475	2016	671	73.077	8.952	-0.807	2016	42.9	9	224	557.4	Nuclear
