# Supplementary material for: Genome-wide analysis of PRR gene family uncovers their roles in circadian rhythmic changes and response to drought stress in Gossypium hirsutum L
Source: PeerJ. 2020 Sep 25;8:e9936. doi: 10.7717/peerj.9936 (PMC7521341; doi:10.7717/peerj.9936)
Supplement: Supplemental Information 7 [file peerj-08-9936-s007.xlsx]

## Sheet:  Suppl Table S4
Table S4: Orthologous relationships among four Gossypium species
Common collinear PRR gene pairs in G.hirsutum and G.arboretum				Common collinear PRR gene pairs in G.hirsutum and G.barbadense				Common collinear PRR gene pairs in G.hirsutum and G.raimondii				Common collinear PRR gene pairs in G.arboretum and G.raimondii				Common collinear PRR gene pairs in G.arboretum and G.barbadense				Common collinear PRR gene pairs in G.barbadense and G.raimondii
Gene ID	Gene name	Gene ID	Gene name	Gene ID	Gene name	Gene ID	Gene name	Gene ID	Gene name	Gene ID	Gene name	Gene ID	Gene name	Gene ID	Gene name	Gene ID	Gene name	Gene ID	Gene name	Gene ID	Gene name	Gene ID	Gene name
Ga01G1961	GaPRR1a	Gh_A03G0597	GhPRR1a	GB_D03G1099	GbPRR1a	Gh_A03G0597	GhPRR1a	Gh_A11G0142	GhPRR5a	Gorai.007G017100	GrPRR5a	Ga01G1961	GaPRR1a	Gorai.003G098300	GrPRR1a	Ga01G1961	GaPRR1a	GB_D03G1099	GbPRR1a	GB_D11G0159	GbPRR5a	Gorai.007G017100	GrPRR5a
Ga01G1961	GaPRR1a	Gh_D03G0885	GhPRR1b	GB_D03G1099	GbPRR1a	Gh_D03G0885	GhPRR1b	Gh_A11G0142	GhPRR5a	Gorai.008G265100	GrPRR5c	Ga04G2138	GaPRR5c	Gorai.012G001000	GrPRR5b	Ga01G1961	GaPRR1a	GB_A03G0809	GbPRR1b	GB_A11G0159	GbPRR5b	Gorai.007G017100	GrPRR5a
Ga09G1818	GaPRR3a	Gh_A09G1502	GhPRR3a	GB_A03G0809	GbPRR1b	Gh_A03G0597	GhPRR1a	Gh_A12G2229	GhPRR5b	Gorai.007G017100	GrPRR5a	Ga09G1818	GaPRR3a	Gorai.007G374800	GrPRR3a	Ga04G2138	GaPRR5c	GB_A05G4460	GbPRR5c	GB_A05G4460	GbPRR5c	Gorai.012G001000	GrPRR5b
Ga09G1818	GaPRR3a	Gh_D09G1513	GhPRR3c	GB_A03G0809	GbPRR1b	Gh_D03G0885	GhPRR1b	Gh_A12G2229	GhPRR5b	Gorai.008G265100	GrPRR5c	Ga09G1818	GaPRR3a	Gorai.009G103700	GrPRR7a					GB_D11G0159	GbPRR5a	Gorai.008G265100	GrPRR5c
Ga11G2989	GaPRR9a	Gh_A11G0920	GhPRR9a	GB_D11G0159	GbPRR5a	Gh_A11G0142	GhPRR5a	Gh_D11G0156	GhPRR5c	Gorai.007G017100	GrPRR5a									GB_A05G1016	GbPRR7a	Gorai.009G103700	GrPRR7a
				GB_D11G0159	GbPRR5a	Gh_A12G2229	GhPRR5b	Gh_D11G0156	GhPRR5c	Gorai.008G265100	GrPRR5c									GB_D05G0992	GbPRR7b	Gorai.009G103700	GrPRR7a
				GB_D11G0159	GbPRR5a	Gh_D11G0156	GhPRR5c	Gh_A05G0856	GhPRR7a	Gorai.009G103700	GrPRR7a
				GB_A11G0159	GbPRR5b	Gh_A11G0142	GhPRR5a	Gh_D05G3868	GhPRR7c	Gorai.009G103700	GrPRR7a
				GB_A11G0159	GbPRR5b	Gh_D11G0156	GhPRR5c
				GB_A05G1016	GbPRR7a	Gh_A05G0856	GhPRR7a
				GB_A05G1016	GbPRR7a	Gh_D05G3868	GhPRR7c
				GB_D05G0992	GbPRR7b	Gh_A05G0856	GhPRR7a
				GB_D05G0992	GbPRR7b	Gh_D05G3868	GhPRR7c
				GB_D04G0887	GbPRR7c	Gh_A05G2996	GhPRR7b
				GB_D04G0887	GbPRR7c	Gh_D04G0791	GhPRR7d
				GB_D04G0887	GbPRR7c	Gh_A05G2996	GhPRR7b
				GB_D04G0887	GbPRR7c	Gh_D04G0791	GhPRR7d
