# Supplementary material for: Genome-wide analysis of PRR gene family uncovers their roles in circadian rhythmic changes and response to drought stress in Gossypium hirsutum L
Source: PeerJ. 2020 Sep 25;8:e9936. doi: 10.7717/peerj.9936 (PMC7521341; doi:10.7717/peerj.9936)
Supplement: Supplemental Information 8 [file peerj-08-9936-s008.xlsx]

## Sheet:  Suppl Table S5
Table S5: The duplication of PRR gene pairs in cotton
# Singleton means that the gene is single-copy, which should not be the type of members of gene families.
# Dispersed means that the gene might arise from transposition, such as 'replicative transposition', 'non-replicative tranposition' or 'conservative tranpostion'
# Proximal means that the gene might arise from small-scale transposition or arise from tandem duplication and insertion of some other genes
# WGD or segmental means that the gene might arise from Whole Genome Duplication or Segmental Duplication.
G.arboretum			G.barbadense			G.hirsutum			G.raimondii
Gene ID	Gene name	Duplication type	Gene ID	Gene name	Duplication type	Gene ID	Gene name	Duplication type	Gene ID	Gene name	Duplication type
Ga01G1961.1	GaPRR1a	WGD or Segmental	GB_D03G1099.1	GbPRR1a	WGD or Segmental	Gh_A03G0597.1	GhPRR1a	WGD or Segmental	Gorai.003G098300.1	GrPRR1a	WGD or Segmental
Ga05G1056.1	GaPRR3a	WGD or Segmental	GB_A03G0809.1	GbPRR1b	WGD or Segmental	Gh_D03G0885.1	GhPRR1b	WGD or Segmental	Gorai.005G145700.1	GrPRR1b	WGD or Segmental
Ga11G0061.1	GaPRR3b	WGD or Segmental	GB_D11G0159.1	GbPRR5a	WGD or Segmental	Gh_A09G1502.1	GhPRR3a	WGD or Segmental	Gorai.007G317900.1	GrPRR1c	Dispersed
Ga11G3967.1	GaPRR5a	WGD or Segmental	GB_A11G0159.1	GbPRR5b	WGD or Segmental	Gh_A11G2902.1	GhPRR3b	WGD or Segmental	Gorai.001G126800.1	GrPRR1d	Dispersed
Ga12G0334.1	GaPRR5b	Dispersed	GB_A05G4460.1	GbPRR5c	Dispersed	Gh_D09G1513.1	GhPRR3c	WGD or Segmental	Gorai.007G374800.1	GrPRR3a	WGD or Segmental
Ga04G2138.1	GaPRR5c	WGD or Segmental	GB_A05G1016.1	GbPRR7a	WGD or Segmental	Gh_D11G3288.1	GhPRR3d	WGD or Segmental	Gorai.007G017100.1	GrPRR5a	Dispersed
Ga09G1818.1	GaPRR7a	WGD or Segmental	GB_D05G0992.1	GbPRR7b	WGD or Segmental	Gh_A11G0142.1	GhPRR5a	WGD or Segmental	Gorai.012G001000.1	GrPRR5b	WGD or Segmental
Ga14G0269.1	GaPRR7b	Dispersed	GB_D04G0887.1	GbPRR7c	WGD or Segmental	Gh_A12G2229.1	GhPRR5b	WGD or Segmental	Gorai.008G265100.1	GrPRR5c	Dispersed
Ga11G2989.1	GaPRR9a	WGD or Segmental	GB_A05G3674.1	GbPRR7d	Dispersed	Gh_D11G0156.1	GhPRR5c	WGD or Segmental	Gorai.009G103700.1	GrPRR7a	WGD or Segmental
						Gh_D12G2716.1	GhPRR5d	WGD or Segmental	Gorai.007G113000.1	GrPRR9a	WGD or Segmental
						Gh_A05G0856.1	GhPRR7a	WGD or Segmental
						Gh_D11G3525.1	GhPRR7b	Dispersed
						Gh_D05G3868.1	GhPRR7c	WGD or Segmental
						Gh_D04G0791.1	GhPRR7d	WGD or Segmental
						Gh_A11G0920.1	GhPRR9a	Dispersed
						Gh_A05G2996.1	GhPRR9b	WGD or Segmental
