# Supplementary material for: Genome-wide analysis of PRR gene family uncovers their roles in circadian rhythmic changes and response to drought stress in Gossypium hirsutum L
Source: PeerJ. 2020 Sep 25;8:e9936. doi: 10.7717/peerj.9936 (PMC7521341; doi:10.7717/peerj.9936)
Supplement: Supplemental Information 10 [file peerj-08-9936-s010.xlsx]

## Sheet: PEG_1h
Table S7: The DEGs together with their detail information of PEG_1h vs CK, PEG_3h vs CK, PEG_6h vs CK
PEG_1h vs CK								PEG_3h vs CK								PEG_6h vs CK
genes	PEG_1h	CK	log2FoldChange	p-value	padj	FDR	up/down	genes	PEG_03h	CK	log2FoldChange	p-value	padj	FDR	up/down	genes	PEG_06h	CK	log2FoldChange	p-value	padj	FDR	up/down
Gh_A03G1705	14067.5	6768.85	1.06583	4.05849e-37	4.24664e-11	6.25776e-09	up	Gh_D01G0290	1329.17	643.157	1.02843	1.11416e-36	2.32461e-11	4.20879e-18	up	Gh_A05G3949	1718.38	931.513	1.02022	7.54e-07	2.65e-56	3.54e-152	up
Gh_A13G0276	1522.35	732.271	1.06641	1.03975e-40	2.73868e-11	9.06206e-14	up	Gh_D13G1729	1815.12	875.715	1.03196	1.71014e-37	1.22884e-11	6.49822e-17	up	Gh_D05G0799	3065.33	1629.27	1.04876	8.85e-10	1.51e-58	7.5e-284	up
Gh_A04G0538	1419.77	672.872	1.08756	3.85322e-39	1.11819e-11	1.56711e-14	up	Gh_D12G0039	1817.59	852.107	1.07441	1.41533e-37	1.44862e-12	2.1551e-18	up	Gh_D01G0531	2796.73	1417.97	1.11742	5.47e-10	4.42e-66	1.37e-285	up
Gh_D10G0579	449.982	225.781	1.00339	1.63792e-38	7.59718e-10	1.40437e-15	up	Gh_D13G1732	1383.35	646.767	1.07694	5.03951e-38	2.00119e-12	9.49219e-20	up	Gh_A03G0503	2429.53	1239.71	1.10785	2.9e-10	4.15e-65	9.35e-245	up
Gh_D10G1143	1029.64	501.515	1.04716	1.80582e-38	9.99781e-11	2.13112e-14	up	Gh_A11G2259	2918.49	1317.51	1.12761	5.4826e-37	8.45943e-14	2.70441e-18	up	Gh_A11G2566	5559.29	2864.51	1.09322	2.33e-09	2.73e-64	0	up
Gh_A13G0275	669.861	336.058	1.00582	1.93188e-38	6.07098e-10	1.39811e-14	up	Gh_A13G1464	2077.33	942.548	1.12016	1.38273e-37	1.23431e-13	1.81273e-19	up	Gh_A05G0654	2977.13	1445.25	1.17968	4.95e-10	1.08e-73	0	up
Gh_D10G1484	562.814	278.299	1.02804	1.32487e-38	2.4339e-10	8.94312e-16	up	Gh_D13G1199	1023.83	495.043	1.02967	9.4061e-38	2.8412e-11	1.72296e-19	up	Gh_A04G0218	1897.33	931.092	1.16397	6.23e-07	7.91e-73	5.85e-206	up
Gh_A09G2226	376.856	183.956	1.04435	4.37472e-39	9.28824e-11	3.93902e-17	up	Gh_A12G2522	1639.01	755.51	1.09734	1.0948e-37	5.27183e-13	1.0492e-19	up	Gh_D08G0702	1264.6	667.164	1.06048	1.44e-11	5.23e-53	7.47e-119	up
Gh_A08G0786	1261.99	602.226	1.0782	2.54847e-38	2.04952e-11	1.23175e-14	up	Gh_A06G0873	502.865	247.788	1.00096	2.15796e-38	1.0067e-10	3.90831e-22	up	Gh_A07G2182	955.117	525.419	1.00016	0.000342443	4.19e-41	7.92e-82	up
Gh_D07G0052	282.029	141.499	1.00884	3.71392e-39	6.15595e-11	1.85897e-15	up	Gh_A01G0864	323.909	159.192	1.00719	1.54214e-38	2.8856e-11	3.81191e-20	up	Gh_D05G1429	9239.66	4644.47	1.12911	5.06e-09	4.78e-67	0	up
Gh_D08G1949	318.619	159.068	1.01373	3.9487e-39	4.89194e-10	4.75108e-16	up	Gh_A09G2286	556.228	270.264	1.02291	1.6314e-37	3.81412e-11	9.07205e-23	up	Gh_D13G0236	2161.68	989.556	1.26463	4.73e-08	8.11e-85	4.19e-266	up
Gh_A06G0183	715.326	355.28	1.02027	6.0007e-39	3.29674e-10	8.34084e-15	up	Gh_A12G2364	331.819	162.635	1.00658	3.60889e-38	3.13126e-11	2.06825e-20	up	Gh_D08G0280	267.866	147.041	1.00085	1.06e-06	2.17e-19	6.1e-23	up
Gh_A05G3925	813.648	398.306	1.04246	6.26862e-41	1.27661e-10	4.82547e-15	up	Gh_D05G1062	315.334	151.803	1.0314	3.37019e-38	8.72588e-12	1.24675e-20	up	Gh_D13G1460	225.366	122.065	1.01649	8.02e-11	8.9e-17	9.73e-20	up
Gh_D02G1653	460.521	227.352	1.03186	4.69541e-41	2.29568e-10	2.03673e-16	up	Gh_D12G1145	928.955	442.363	1.05257	2.08113e-40	9.38222e-12	5.75877e-21	up	Gh_A04G0058	670.307	365.063	1.01315	1.07e-07	3.23e-39	1.57e-58	up
Gh_A08G1462	281.55	140.178	1.01908	3.57257e-39	3.8248e-11	9.41827e-16	up	Gh_A11G0330	462.436	224.794	1.01863	1.3039e-37	4.05569e-11	5.05439e-23	up	Gh_D12G0392	208.078	114.147	1.00059	6.96e-07	3.61e-15	8.23e-18	up
Gh_A12G1621	226.177	113.204	1.0079	3.11184e-39	3.64492e-11	7.86854e-14	up	Gh_A09G1844	290.615	139.551	1.0355	2.95198e-38	6.57699e-12	1.08655e-19	up	Gh_D10G2047	200.579	109.674	1.00904	2.35e-06	7.23e-15	1.9e-17	up
Gh_D05G3672	870.446	422.951	1.05058	3.63102e-38	8.94544e-11	4.66936e-15	up	Gh_A13G2139	232.334	113.947	1.00435	1.44295e-37	5.46174e-11	1.58941e-15	up	Gh_A13G2139	208.463	113.947	1.0069	7.93e-07	2.58e-15	5.51e-18	up
Gh_A06G0655	346.367	168.978	1.04307	2.27842e-38	1.44503e-10	4.37656e-17	up	Gh_D07G1702	240.902	117.467	1.02187	4.12468e-37	2.05338e-11	1.6044e-16	up	Gh_D05G1665	180.256	97.9554	1.0165	1.98e-10	1.71e-13	8.13e-16	up
Gh_D09G2205	405.199	194.374	1.07144	1.33548e-38	3.8248e-11	6.18751e-18	up	Gh_A05G1554	328.987	156.932	1.0475	1.00097e-37	4.37193e-12	8.68749e-22	up	Gh_D06G1036	117.629	64.1596	1.01078	2.88e-06	7.82e-09	2.49e-10	up
Gh_D09G0955	252.097	122.487	1.0548	3.11012e-39	3.9738e-12	5.33834e-16	up	Gh_D05G3260	245.872	117.811	1.03923	1.08322e-38	8.51001e-12	2.62307e-17	up	Gh_A05G1261	7378.55	3591.34	1.17567	2.2e-09	1.76e-73	0	up
Gh_D05G1111	219.484	108.115	1.02756	2.74171e-41	1.71045e-11	5.06169e-14	up	Gh_D05G0718	1538.96	667.145	1.18721	3.20969e-38	4.62939e-15	1.57688e-23	up	Gh_D06G0111	412.411	222.651	1.02483	6.52e-08	1.92e-29	1.36e-36	up
Gh_D06G1704	285.945	137.603	1.06011	5.38709e-38	5.94648e-12	4.84182e-17	up	Gh_D08G2533	392.021	189.001	1.03295	1.12327e-40	1.43788e-11	4.79037e-23	up	Gh_A05G1579	126.115	68.1824	1.01861	1.37e-05	1.58e-09	3.81e-11	up
Gh_A10G1039	853.038	414.223	1.05313	2.36814e-39	8.02364e-11	3.33919e-15	up	Gh_A09G1143	524.776	247.815	1.06271	1.75577e-38	5.69896e-12	8.47286e-25	up	Gh_D05G1264	40.4162	21.5651	1.00186	4.56e-05	0.00396594	0.00122167	up
Gh_A05G3730	625.489	298.555	1.07375	2.00099e-39	3.23192e-11	6.87541e-17	up	Gh_D02G2425	388.342	185.8	1.04121	3.34981e-38	9.38222e-12	2.62066e-23	up	Gh_D08G0414	39.7118	21.6232	1.00186	4.56e-05	0.00396594	0.00122167	up
Gh_A02G1166	195.703	97.5166	1.00714	8.05782e-39	8.2794e-11	1.7225e-12	up	Gh_A07G1544	231.388	111.931	1.02357	1.3333e-37	2.461e-11	5.74509e-16	up	Gh_A09G0003	70.396	38.0548	1.00186	1.21e-05	3e-05	4e-06	up
Gh_A04G0629	717.11	347.723	1.05302	2.10138e-39	7.87912e-11	8.80533e-16	up	Gh_A08G0736	386.114	183.071	1.05719	3.26456e-38	4.29766e-12	6.14067e-24	up	Gh_A08G1389	134.245	72.3043	1.02554	4.01e-07	3.12e-10	5.81e-12	up
Gh_A08G2544	263.428	124.807	1.0815	2.8986e-39	1.27041e-12	4.19877e-17	up	Gh_D10G1401	248.043	116.596	1.06315	2.347e-38	2.73709e-12	3.99211e-18	up	Gh_D09G2182	65.3671	35.2638	1.01198	2.34e-06	5.8e-05	8.61e-06	up
Gh_A01G1820	400.079	188.416	1.09878	8.75192e-39	1.07268e-11	7.55417e-19	up	Gh_D13G1361	518.893	238.437	1.10546	1.57156e-38	6.88007e-13	7.23729e-27	up	Gh_A04G0349	113.616	61.3969	1.02974	5.98e-07	8.76e-09	2.82e-10	up
Gh_D05G1062	317.17	151.803	1.06949	1.33158e-39	4.54125e-11	9.31094e-18	up	Gh_D02G0399	140.81	69.4232	1.00776	4.7126e-38	1.16295e-08	8.68258e-10	up	Gh_D05G0313	69.0836	37.3438	1.01907	5.28e-06	2.61e-05	3.38e-06	up
Gh_A09G2368	374.592	176.017	1.10071	2.72356e-38	6.8584e-12	5.80659e-19	up	Gh_D07G0368	161.874	79.1096	1.01358	5.34052e-41	1.48592e-09	2.68734e-11	up	Gh_D12G2599	137.856	74.0453	1.02871	4e-07	1.39e-10	2.23e-12	up
Gh_A03G2157	161.116	78.7459	1.03296	8.85389e-40	2.94009e-10	4.38282e-11	up	Gh_A12G1098	1720.73	729.568	1.21826	4.01035e-37	6.78533e-16	3.63802e-24	up	Gh_D02G2156	117.495	63.3131	1.02104	1.63e-05	6.8e-09	2.1e-10	up
Gh_D06G0745	265.744	125.603	1.0864	6.81912e-39	1.05199e-12	2.48102e-17	up	Gh_A03G1580	409.602	193.07	1.06752	1.31385e-38	3.09748e-12	8.47286e-25	up	Gh_D05G1126	108.034	58.1068	1.02388	2.13e-05	2.93e-08	1.17e-09	up
Gh_D04G1805	522.312	250.094	1.07201	1.32182e-38	3.61183e-11	2.21666e-17	up	Gh_A05G1626	425.986	200.784	1.0642	3.203e-38	4.10959e-12	7.6597e-25	up	Gh_A01G1670	33.6976	18.2711	1.01737	5.64e-05	0.00891321	0.00321418	up
Gh_A12G1166	199.385	97.8392	1.02904	1.86455e-38	3.00896e-11	4.04164e-13	up	Gh_D13G1075	147.028	70.5853	1.02679	4.71678e-41	3.60015e-09	1.58474e-10	up	Gh_D11G3469	170.985	91.5011	1.03365	2.03e-06	3.65e-13	1.99e-15	up
Gh_D13G0445	212.492	103.984	1.03493	1.0254e-39	1.47591e-11	6.99399e-14	up	Gh_A07G0713	151.41	72.6237	1.02561	4.84151e-41	2.5766e-09	8.90299e-11	up	Gh_D05G2615	35.7274	19.4715	1.02388	9.57e-06	0.00609824	0.00204886	up
Gh_A04G1402	303.334	143.319	1.09218	9.48422e-39	1.9559e-12	2.70251e-18	up	Gh_D12G0554	730.896	324.243	1.15473	4.52842e-37	5.28357e-14	2.58858e-27	up	Gh_A08G1271	49.7815	27.3982	1.00186	2.6e-05	0.00079513	0.000185617	up
Gh_D11G3201	336.578	160.52	1.0749	3.43307e-38	3.8248e-11	4.6805e-18	up	Gh_D10G1124	177.486	85.101	1.03609	1.68937e-38	2.19668e-10	9.43112e-13	up	Gh_D10G1617	50.4209	27.1359	1.00186	2.6e-05	0.00079513	0.000185617	up
Gh_D02G1999	1037.4	485.868	1.10366	2.27537e-39	7.69093e-12	5.08282e-16	up	Gh_A08G2420	278.173	126.529	1.10984	2.28646e-38	1.91577e-13	2.1315e-21	up	Gh_A13G1773	116.438	62.1725	1.03156	8.61e-10	5.9e-09	1.76e-10	up
Gh_D02G0696	149.06	72.8062	1.03466	6.10439e-39	8.48662e-10	2.25664e-10	up	Gh_A12G2471	290.15	132.447	1.11522	3.70846e-37	1.35596e-13	2.73231e-22	up	Gh_A05G0632	217.083	115.141	1.04915	1.73e-06	5.29e-17	5.36e-20	up
Gh_A06G1466	8102.73	3640.76	1.16455	5.70253e-39	2.785e-13	9.16935e-12	up	Gh_A12G2365	280.468	127.072	1.12017	5.42231e-37	1.1358e-13	7.16845e-22	up	Gh_A10G1998	40.5365	21.7485	1.01978	0.000233955	0.00304788	0.000900844	up
Gh_A04G1194	218.617	104.893	1.06803	2.31993e-39	2.73392e-12	5.16461e-15	up	Gh_D08G1189	326.431	146.823	1.12905	2.43946e-38	7.54326e-14	1.0238e-24	up	Gh_D07G1702	223.187	117.467	1.06373	1.07e-06	7.86e-18	5.44e-21	up
Gh_D05G3859	165.855	80.0821	1.05897	8.1638e-40	7.48122e-11	6.91773e-12	up	Gh_A09G2226	396.682	183.956	1.08986	2.80165e-38	9.36559e-13	1.56012e-25	up	Gh_A04G0160	100.136	54.5685	1.00186	1.3e-09	2.06e-07	1.16e-08	up
Gh_A13G1450	395.455	181.032	1.13531	3.1271e-39	1.83772e-12	4.51461e-20	up	Gh_D06G1641	110.397	54.459	1.00158	1.02846e-38	3.88158e-07	1.31699e-07	up	Gh_A04G1395	1152.03	539.521	1.23138	4.74e-12	1.67e-63	5.74e-136	up
Gh_A13G1619	191.428	92.9172	1.04507	8.72787e-40	2.27129e-11	4.68745e-13	up	Gh_A02G0264	197.862	94.3001	1.05313	5.35901e-41	2.8856e-11	1.40679e-14	up	Gh_A05G3943	31.6555	17.4665	1.01008	1.21e-05	0.0127733	0.00506791	up
Gh_A03G0803	2616.99	1221.12	1.11025	2.02479e-37	2.61001e-12	2.37787e-13	up	Gh_A11G2312	126.404	60.9032	1.02244	1.1544e-38	3.55649e-08	5.47403e-09	up	Gh_A13G1159	32.1077	17.4246	1.01008	1.21e-05	0.0127733	0.00506791	up
Gh_A05G1447	111.95	56.0557	1.00361	1.17524e-38	1.44496e-07	1.47789e-07	up	Gh_D05G3477	209.411	99.0256	1.05661	7.25139e-39	1.41557e-11	2.03002e-15	up	Gh_D11G2412	31.8748	17.2045	1.01008	1.21e-05	0.0127733	0.00506791	up
Gh_A06G0707	152.112	72.9707	1.06335	1.36424e-38	2.37452e-10	4.51848e-11	up	Gh_D02G1999	1128.64	485.868	1.19696	1.53027e-37	4.93916e-15	6.29671e-26	up	Gh_A11G1961	64.7005	34.9783	1.03245	1.42e-05	4.14e-05	5.72e-06	up
Gh_A03G0057	191.79	93.1854	1.0526	2.01421e-39	1.5751e-11	2.85863e-13	up	Gh_A05G2646	140.388	65.5579	1.0612	1.29456e-37	2.46376e-09	1.32326e-10	up	Gh_A10G1322	199.525	106.772	1.03813	1.04e-05	2.09e-15	4.32e-18	up
Gh_A08G2543	241.754	112.577	1.10656	2.25386e-41	3.39837e-13	4.59823e-17	up	Gh_D05G0435	623.907	269.975	1.18934	3.42179e-38	9.40997e-15	3.37566e-30	up	Gh_A09G1563	31.2287	16.8516	1.00609	0.000206757	0.0155614	0.00627294	up
Gh_D07G0134	96.1597	48.3887	1.00246	1.47163e-38	1.18277e-06	1.57568e-06	up	Gh_A03G1004	232.091	106.779	1.09544	4.3891e-37	1.01003e-12	5.28401e-18	up	Gh_D11G1083	30.6663	16.9213	1.00609	0.000206757	0.0155614	0.00627294	up
Gh_D11G1501	313.44	144.02	1.12899	2.87249e-38	4.29131e-13	1.37272e-19	up	Gh_D09G1147	389.624	175.842	1.12825	1.08333e-38	1.2678e-13	4.76691e-27	up	Gh_D11G1504	448.577	234.295	1.07633	3.85e-07	5.5e-34	4.86e-43	up
Gh_A03G1218	319.134	147.308	1.1267	1.105e-39	5.67993e-13	1.37555e-19	up	Gh_A05G1589	120.996	58.4365	1.03638	1.06666e-38	4.25405e-08	7.75947e-09	up	Gh_D10G2071	33.4159	17.9639	1.01383	0.000178534	0.0107006	0.0040512	up
Gh_A13G1096	1084.53	492.641	1.14831	1.18027e-38	9.15575e-13	3.34047e-17	up	Gh_A11G0866	156.279	73.1252	1.0725	5.56247e-39	3.4846e-10	5.63854e-12	up	Gh_A05G3862	53.0954	28.626	1.0093	2.31e-05	0.000440109	9.35e-05	up
Gh_A05G3047	1003.97	457.286	1.14574	1.50787e-38	1.05199e-12	2.0315e-17	up	Gh_D12G2500	402.3	183.089	1.11576	8.38155e-41	2.59201e-13	8.88301e-27	up	Gh_D11G1146	743.276	390.524	1.06494	2.64e-13	2.29e-44	3.73e-70	up
Gh_A12G2498	125.334	61.0603	1.03914	4.86317e-39	1.10593e-08	6.89246e-09	up	Gh_A07G0536	211.335	99.1375	1.07034	5.25361e-38	7.31864e-12	6.88159e-16	up	Gh_A03G1967	43.4252	23.1287	1.01104	9.26e-05	0.00222179	0.000618646	up
Gh_A10G1656	106.954	52.5128	1.0167	5.83993e-40	1.93996e-07	2.09217e-07	up	Gh_D11G2617	245.931	111.466	1.12716	5.76118e-38	1.49563e-13	6.82737e-20	up	Gh_D13G2121	43.1222	23.0932	1.01104	9.26e-05	0.00222179	0.000618646	up
Gh_A03G2127	131.536	63.5598	1.04879	9.12846e-39	3.56678e-09	1.65961e-09	up	Gh_A12G2280	79.9646	39.0132	1.00885	2.21498e-38	1.34376e-05	1.14578e-05	up	Gh_A09G0658	24.6481	13.1417	1.02833	0.00033282	0.0345627	0.0166181	up
Gh_A04G0778	533.735	246.098	1.12805	3.73847e-38	2.73392e-12	3.71289e-19	up	Gh_D11G1792	315.755	139.673	1.15435	6.78358e-38	1.8718e-14	3.88362e-25	up	Gh_D09G1710	23.7324	12.8509	1.02388	2.61e-05	0.0416601	0.0206712	up
Gh_D07G2369	179.956	85.5028	1.07189	7.62549e-40	1.53082e-11	5.25939e-13	up	Gh_A11G1815	381.467	168.572	1.15304	7.83784e-41	3.26721e-14	6.99112e-28	up	Gh_D12G1776	201.704	107.114	1.04937	1.08e-05	7.39e-16	1.25e-18	up
Gh_A13G2136	178.547	85.2396	1.08064	1.74962e-41	1.14982e-11	4.01117e-13	up	Gh_A12G0364	89.6332	43.5968	1.00587	4.51251e-38	3.93452e-06	2.57198e-06	up	Gh_D08G1128	165.928	87.5744	1.05496	3.47e-06	3.46e-13	1.85e-15	up
Gh_A05G3996	194.754	92.7994	1.07495	7.82713e-40	5.12933e-12	6.14799e-14	up	Gh_A10G0125	73.7061	35.6478	1.01104	6.37343e-39	2.93182e-05	2.77383e-05	up	Gh_A06G1855	37.6257	20.1023	1.02974	4.17e-05	0.00416277	0.00130443	up
Gh_D06G0812	161.647	76.132	1.09738	3.94658e-39	2.65449e-11	2.26154e-12	up	Gh_A05G3980	138.084	63.8172	1.08456	3.5914e-38	1.4808e-09	7.80823e-11	up	Gh_A09G1573	37.6657	20.1797	1.02974	4.17e-05	0.00416277	0.00130443	up
Gh_D12G0600	97.5557	48.0459	1.03206	5.20138e-40	4.54097e-07	5.44869e-07	up	Gh_D13G0729	302.317	132.969	1.16283	6.46438e-41	1.18269e-14	1.10609e-24	up	Gh_D08G1588	178.558	94.2942	1.06093	2.25e-07	2.51e-14	8.28e-17	up
Gh_D08G0035	159.897	75.4511	1.09847	1.77529e-38	3.09458e-11	2.93871e-12	up	Gh_A01G0982	80.6579	38.507	1.02667	2.12073e-38	8.51511e-06	6.74426e-06	up	Gh_D04G0697	43.9167	23.863	1.01383	1.15e-08	0.00183395	0.000494666	up
Gh_D05G0635	155.161	72.9166	1.09149	1.56497e-39	6.54685e-11	8.70529e-12	up	Gh_D11G1095	82.6032	39.6023	1.02559	1.09447e-37	6.7289e-06	5.00899e-06	up	Gh_D08G1684	69.848	37.3928	1.03982	4.92e-06	1.53e-05	1.77e-06	up
Gh_A12G0561	73.5839	36.7978	1.00017	1.03005e-41	2.7054e-05	4.43051e-05	up	Gh_A03G1527	155.611	72.0681	1.09227	3.90793e-41	1.7461e-10	2.40237e-12	up	Gh_A07G0661	41.0519	21.5933	1.03748	4.13e-05	0.0023428	0.000654797	up
Gh_D09G2051	958.377	427.331	1.17601	4.12011e-39	2.49217e-13	1.4738e-18	up	Gh_A07G0397	108.397	51.5317	1.02916	8.84692e-39	2.51566e-07	8.17237e-08	up	Gh_D03G1638	41.1439	21.5941	1.03748	4.13e-05	0.0023428	0.000654797	up
Gh_A01G1725	543.134	246.474	1.15216	7.61519e-39	9.15575e-13	6.53707e-20	up	Gh_A05G1008	159.317	72.9556	1.09993	2.93814e-38	9.9123e-11	1.01962e-12	up	Gh_D06G1168	41.4301	21.8005	1.03748	4.13e-05	0.0023428	0.000654797	up
Gh_A13G1971	303.134	135.545	1.16442	7.29892e-39	5.05425e-14	1.38805e-20	up	Gh_A04G0879	69.4302	33.2498	1.03453	5.47358e-39	3.98558e-05	3.91223e-05	up	Gh_D02G0956	85.6723	46.7911	1.01104	7.09e-06	1.74e-06	1.38e-07	up
Gh_D13G1361	526.851	238.437	1.15667	2.43659e-38	7.43234e-13	3.72277e-20	up	Gh_D12G2552	69.3844	33.3443	1.03453	5.47358e-39	3.98558e-05	3.91223e-05	up	Gh_D10G1376	257.855	134.023	1.07911	8.49e-08	5.34e-21	7.84e-25	up
Gh_A10G1762	90.1643	43.8004	1.034	3.63663e-39	1.38161e-06	1.82484e-06	up	Gh_A09G0629	216.07	98.8832	1.10409	4.84939e-38	1.35098e-12	4.20639e-17	up	Gh_A11G0089	25.7455	13.5666	1.03245	4.06e-05	0.0285658	0.0132028	up
Gh_A10G1882	83.3317	40.7623	1.01852	3.48084e-39	5.12029e-06	7.7366e-06	up	Gh_D05G1804	73.1356	34.7142	1.03162	5.7935e-39	2.38292e-05	2.18677e-05	up	Gh_D12G2335	26.0643	13.8119	1.03245	4.06e-05	0.0285658	0.0132028	up
Gh_A05G1602	76.0528	38.4726	1.00043	1.03214e-39	2.01313e-05	3.26314e-05	up	Gh_D05G2134	88.424	41.5287	1.03997	4.01431e-38	2.6219e-06	1.59024e-06	up	Gh_D05G0543	75.4914	40.3279	1.02833	2.03e-06	7.91e-06	8.17e-07	up
Gh_A13G1988	79.8386	40.0879	1.00091	3.40336e-39	1.11e-05	1.78133e-05	up	Gh_D05G1810	610.451	255.545	1.23338	1.25175e-38	9.48286e-16	1.21448e-32	up	Gh_A09G2012	92.6893	50.2845	1.02031	8.97e-07	4.24e-07	2.7e-08	up
Gh_A01G1647	106.864	51.8607	1.04393	7.31494e-39	1.01113e-07	9.9918e-08	up	Gh_A11G0166	62.2723	29.5062	1.0167	5.07835e-38	0.000135598	0.000159473	up	Gh_D05G3295	277.475	143.068	1.08817	5.28e-07	9.06e-23	5.25e-27	up
Gh_D07G1912	107.175	52.3187	1.04393	7.31494e-39	1.01113e-07	9.9918e-08	up	Gh_D13G1549	62.4521	29.7963	1.0167	5.07835e-38	0.000135598	0.000159473	up	Gh_D08G1876	293.435	152.141	1.08142	2.43e-11	8.84e-24	2.72e-28	up
Gh_D06G1573	117.005	55.891	1.06639	1.28701e-39	1.47218e-08	1.00634e-08	up	Gh_A13G0378	63.9971	30.7436	1.0156	1.59119e-41	0.000103649	0.000118599	up	Gh_D13G0782	27.3185	14.3211	1.03627	0.000269303	0.0235969	0.0104792	up
Gh_A03G0423	102.543	50.0529	1.04523	3.8533e-39	1.67953e-07	1.76545e-07	up	Gh_D08G2694	65.9662	31.9519	1.01458	5.41128e-38	8.03944e-05	8.99174e-05	up	Gh_A08G1296	152.247	80.8208	1.04744	4.16e-06	5.94e-12	5.23e-14	up
Gh_A12G2146	112.46	54.1651	1.05561	5.3011e-40	3.80344e-08	3.16209e-08	up	Gh_A05G0330	515.892	219.617	1.21046	2.65863e-38	3.16293e-15	3.9117e-32	up	Gh_A03G2085	45.4325	24.2005	1.0165	8e-05	0.00151097	0.000393356	up
Gh_A12G0193	109.587	52.7774	1.05643	7.29024e-39	4.86995e-08	4.23415e-08	up	Gh_D11G3432	400.622	176.432	1.16836	2.28115e-38	1.68753e-14	3.95889e-29	up	Gh_D05G2944	74.1593	39.3963	1.04503	4.79e-05	6.82e-06	6.82e-07	up
Gh_A08G1489	1498.2	628.149	1.26454	1.56795e-38	1.26599e-15	1.4515e-19	up	Gh_A03G1426	99.1608	46.8448	1.04858	3.26532e-39	4.98232e-07	2.07967e-07	up	Gh_D01G1255	184.121	96.0819	1.07046	3.38e-08	6.44e-15	1.64e-17	up
Gh_A03G1631	261.26	115.798	1.17794	6.40518e-39	9.94365e-15	7.26372e-20	up	Gh_A02G0455	139.454	63.4069	1.1175	4.35556e-39	4.96549e-10	1.87041e-11	up	Gh_A02G1074	27.6699	14.572	1.03983	1.77e-05	0.0196636	0.00845956	up
Gh_A11G0380	147.566	69.0713	1.1057	6.01876e-40	8.53269e-11	1.49285e-11	up	Gh_D02G2156	139.153	63.3131	1.1175	4.35556e-39	4.96549e-10	1.87041e-11	up	Gh_D05G1598	181.828	95.0279	1.06972	2.62e-06	9.6e-15	2.64e-17	up
Gh_D05G2650	292.749	130.635	1.1699	8.99101e-40	2.88707e-14	1.43806e-20	up	Gh_A10G1599	56.2015	27.4801	1.02045	1.77873e-39	0.000298793	0.000379215	up	Gh_A05G2642	48.1198	25.5291	1.02388	2.31e-05	0.000844646	0.000197945	up
Gh_D05G2909	74.816	36.6146	1.01941	1.0729e-38	1.65144e-05	2.60875e-05	up	Gh_D10G0960	100.873	47.5747	1.04724	4.52424e-38	3.99312e-07	1.54868e-07	up	Gh_A09G0883	119.794	63.103	1.05757	1.48e-05	1.31e-09	3e-11	up
Gh_D04G1269	426.834	190.995	1.17019	1.10617e-39	4.61853e-13	3.66257e-21	up	Gh_D10G2033	73.8454	35.3557	1.05112	1.82546e-41	1.4838e-05	1.27765e-05	up	Gh_A11G2095	145.316	76.2433	1.06188	8.97e-06	1.2e-11	1.18e-13	up
Gh_D13G2149	121.143	57.1223	1.0894	3.03191e-39	4.51106e-09	2.46418e-09	up	Gh_A13G1846	87.4048	41.0098	1.05792	6.59186e-39	2.11447e-06	1.23836e-06	up	Gh_A06G1995	93.341	49.8711	1.03466	5.74e-06	3.01e-07	1.78e-08	up
Gh_D10G1912	90.9126	43.9323	1.04985	1.07063e-39	8.57233e-07	1.06466e-06	up	Gh_D05G2004	87.0055	41.4977	1.05792	6.59186e-39	2.11447e-06	1.23836e-06	up	Gh_A11G3222	36.7919	19.3148	1.06341	8.61e-06	0.00362633	0.00108786	up
Gh_A11G1353	250.664	111.739	1.17202	2.1013e-38	1.25791e-14	2.75363e-19	up	Gh_A08G2418	50.1486	24.0653	1.02512	1.18084e-38	0.000669519	0.000908027	up	Gh_D05G3260	230.419	117.811	1.10219	1.46e-06	2.15e-19	7.16e-23	up
Gh_D06G1799	7768.09	3287.79	1.25076	9.67365e-39	2.6845e-15	1.05119e-13	up	Gh_D10G1903	69.7454	32.5011	1.05514	1.65589e-38	2.50806e-05	2.28192e-05	up	Gh_D11G0509	110.132	57.9484	1.06274	6.24e-07	6.84e-09	2.07e-10	up
Gh_A01G1403	448.974	199.869	1.17632	6.3391e-39	3.53433e-13	2.87886e-21	up	Gh_A06G0308	35.4681	17.4428	1.00205	5.00654e-38	0.00703752	0.0114997	up	Gh_A07G0729	230.885	118.086	1.10235	5.13e-07	1.78e-19	5.66e-23	up
Gh_A10G1483	125.232	59.2264	1.08684	4.02325e-39	2.76074e-09	1.38313e-09	up	Gh_A10G1805	34.6561	16.8013	1.00205	5.00654e-38	0.00703752	0.0114997	up	Gh_D08G2649	35.482	18.1651	1.05919	6.23e-05	0.00527197	0.00173376	up
Gh_D13G2513	194.109	89.6438	1.1146	5.16182e-39	1.03958e-12	8.97633e-15	up	Gh_D12G1593	35.15	17.4438	1.00205	5.00654e-38	0.00703752	0.0114997	up	Gh_D02G0744	870.79	426.546	1.16701	0.0974715	7.71e-54	1.02e-94	up
Gh_D01G0718	119.45	56.3494	1.09075	4.99203e-40	5.71864e-09	3.33034e-09	up	Gh_D06G1750	94.6816	45.3195	1.05142	7.58591e-38	8.12214e-07	3.73898e-07	up	Gh_A03G0963	207.837	108.079	1.07824	1.15e-06	5.29e-17	5.36e-20	up
Gh_A12G2280	79.5113	39.0132	1.03698	3.02693e-39	5.60158e-06	8.32248e-06	up	Gh_D12G2247	94.8187	44.904	1.05142	7.58591e-38	8.12214e-07	3.73898e-07	up	Gh_A12G2581	28.7073	15.0204	1.04315	3.98e-05	0.0163194	0.00667986	up
Gh_D11G1603	91.7332	44.08	1.06554	3.26959e-39	5.18837e-07	6.13207e-07	up	Gh_A11G2024	53.8288	26.3813	1.02189	2.27837e-38	0.000392401	0.000506243	up	Gh_D10G0188	51.5706	27.326	1.05844	2.28e-05	0.000271561	5.25e-05	up
Gh_A10G1593	88.6288	42.7883	1.05075	9.92193e-40	1.12854e-06	1.43612e-06	up	Gh_D05G1598	211.275	95.0279	1.12957	5.91994e-39	5.95071e-13	2.15556e-17	up	Gh_A07G0581	33.2185	17.0922	1.05447	1.08e-05	0.00771539	0.00273109	up
Gh_D11G1041	238.208	105.909	1.17442	5.55631e-39	1.23118e-14	9.07193e-19	up	Gh_D12G1222	851.949	351.763	1.25615	1.07432e-40	2.07263e-16	3.74953e-31	up	Gh_D06G0686	33.0935	17.449	1.05447	1.08e-05	0.00771539	0.00273109	up
Gh_A08G0720	330.996	145.517	1.18981	8.74505e-40	1.61305e-13	8.67432e-22	up	Gh_A11G2132	62.9759	30.4123	1.0396	2.61495e-38	8.5498e-05	9.47852e-05	up	Gh_A05G3344	30.8828	16.4484	1.04916	1.23e-05	0.0112813	0.00428149	up
Gh_A12G2118	62.5112	31.4243	1.02119	3.37494e-40	9.52891e-05	0.000160442	up	Gh_A08G0938	244.902	107.369	1.17404	6.9534e-37	1.68507e-14	3.48697e-21	up	Gh_A02G1086	33.556	17.6051	1.0569	0.000159239	0.00637917	0.00216454	up
Gh_D07G0368	173.643	79.1096	1.14481	1.42062e-39	1.35983e-12	3.97721e-14	up	Gh_D05G0635	163.343	72.9166	1.1357	1.81773e-37	1.92814e-11	9.74633e-14	up	Gh_D01G0935	33.8144	17.5263	1.0569	0.000159239	0.00637917	0.00216454	up
Gh_A12G2487	123.329	56.945	1.11298	3.73037e-39	1.71072e-09	8.00875e-10	up	Gh_A12G2367	41.6825	19.8095	1.03344	1.35842e-39	0.00198672	0.00288052	up	Gh_A13G0667	31.7725	16.7474	1.0519	0.000183147	0.00940451	0.00340417	up
Gh_D05G1242	131.833	61.1556	1.11751	3.87271e-39	4.34012e-10	1.42233e-10	up	Gh_A09G1346	20.7314	10.2168	1.01552	4.07329e-39	0.0474512	0.0836185	up	Gh_D05G3292	32.3637	16.6323	1.0519	0.000183147	0.00940451	0.00340417	up
Gh_A05G0242	76.5714	36.7209	1.05713	8.8106e-42	6.12716e-06	8.85921e-06	up	Gh_D05G1588	21.1013	9.96167	1.01552	4.07329e-39	0.0474512	0.0836185	up	Gh_A07G0616	41.1335	21.2174	1.07065	3.39e-05	0.00166771	0.000438844	up
Gh_D04G1266	310.762	134.869	1.21263	8.23291e-40	5.34713e-15	2.65519e-22	up	Gh_D08G1686	21.0898	10.411	1.01552	4.07329e-39	0.0474512	0.0836185	up	Gh_D01G1920	41.2476	21.4729	1.07065	3.39e-05	0.00166771	0.000438844	up
Gh_D10G1120	125.376	58.3642	1.11129	2.80148e-39	1.35588e-09	6.02285e-10	up	Gh_D12G1501	21.2291	10.2279	1.01552	4.07329e-39	0.0474512	0.0836185	up	Gh_A01G1767	43.2497	22.6715	1.04206	2.89e-05	0.00159428	0.000418223	up
Gh_A13G1464	2243.51	942.548	1.26113	5.20005e-41	9.22235e-16	6.63489e-18	up	Gh_D12G0195	123.027	56.2623	1.11015	1.61477e-37	4.3813e-09	4.60264e-10	up	Gh_A11G3057	52.5802	27.9791	1.05993	3.62e-06	0.000222022	4.16e-05	up
Gh_A12G2430	172.534	77.8971	1.15477	8.1427e-39	1.03543e-12	2.87034e-14	up	Gh_A12G0939	44.1402	21.4912	1.03107	5.28608e-38	0.00149815	0.00215968	up	Gh_A10G1895	49.7479	26.4865	1.0553	2.46e-05	0.000404702	8.41e-05	up
Gh_A09G1504	69.5018	34.0005	1.04083	4.90057e-39	2.46495e-05	3.78635e-05	up	Gh_A12G2506	45.5268	21.7001	1.02891	1.94516e-38	0.00114555	0.00161278	up	Gh_D06G1169	90.7849	48.4127	1.04724	9.11e-07	3.15e-07	1.88e-08	up
Gh_D10G2163	96.8294	46.0129	1.07809	4.18706e-40	1.86956e-07	1.95171e-07	up	Gh_D06G1168	45.6138	21.8005	1.02891	1.94516e-38	0.00114555	0.00161278	up	Gh_A13G1470	129.893	67.2899	1.08491	5.74e-10	8.3e-11	1.16e-12	up
Gh_A03G1680	512.131	223.896	1.2024	2.54678e-39	8.13973e-14	7.85284e-22	up	Gh_D10G2406	22.5884	11.0505	1.0126	1.25907e-41	0.0359315	0.063051	up	Gh_D07G0698	47.8848	25.4597	1.0519	2.71e-05	0.000598709	0.000133097	up
Gh_D11G1301	58.7908	29.0947	1.02195	3.09836e-40	0.000170804	0.000286739	up	Gh_D11G1910	23.0362	11.0806	1.0126	1.25907e-41	0.0359315	0.063051	up	Gh_A11G0751	24.4493	12.1765	1.08047	0.000145008	0.0298781	0.0138795	up
Gh_D04G0598	484.069	212.015	1.20063	7.85824e-39	9.78826e-14	6.30532e-22	up	Gh_D01G0873	390.339	167.558	1.19526	6.69995e-41	3.77998e-15	4.84013e-30	up	Gh_A13G1513	24.0915	12.0191	1.08047	0.000145008	0.0298781	0.0138795	up
Gh_D13G1075	157.589	70.5853	1.1589	3.06011e-39	4.12731e-12	2.91476e-13	up	Gh_A01G1774	24.7903	11.5445	1.01015	1.17438e-38	0.0275405	0.0477893	up	Gh_D11G1844	24.1047	12.3738	1.08047	0.000145008	0.0298781	0.0138795	up
Gh_D10G1310	195.684	89.027	1.14542	1.44446e-41	2.47807e-13	1.27546e-15	up	Gh_A13G1704	25.2099	11.9178	1.01015	1.17438e-38	0.0275405	0.0477893	up	Gh_A06G1787	44.501	23.2035	1.06051	0.000237215	0.00101007	0.000241736	up
Gh_D05G1620	99.6376	46.7967	1.09113	9.7397e-40	8.94644e-08	8.49335e-08	up	Gh_D02G0080	24.5003	12.4324	1.01015	1.17438e-38	0.0275405	0.0477893	up	Gh_A04G0623	622.832	307.811	1.15527	1.12e-08	5.21e-47	1.19e-66	up
Gh_D02G2192	96.2349	44.6662	1.09458	9.46443e-40	1.5056e-07	1.5256e-07	up	Gh_D04G1199	24.83	11.8293	1.01015	1.17438e-38	0.0275405	0.0477893	up	Gh_A08G1260	23.0304	11.9784	1.07796	0.000131275	0.0363701	0.0174598	up
Gh_D05G0751	122.409	55.5139	1.12655	4.53797e-40	1.33996e-09	6.0513e-10	up	Gh_D06G1403	24.694	11.8904	1.01015	1.17438e-38	0.0275405	0.0477893	up	Gh_A08G2321	81.6308	42.5571	1.07065	7.47e-06	9.52e-07	6.79e-08	up
Gh_A11G1985	55.1451	27.0903	1.02283	6.72161e-40	0.000307756	0.000516946	up	Gh_D10G2127	195.61	87.047	1.1496	7.34929e-38	6.7212e-13	1.01543e-16	up	Gh_D06G0230	24.8612	12.6997	1.08278	2.23e-05	0.0247927	0.0109943	up
Gh_A09G2385	59.6859	28.8145	1.046	1.71664e-39	0.00010584	0.000172478	up	Gh_A09G2051	27.3593	12.5229	1.00805	1.121e-41	0.0209479	0.0359868	up	Gh_D10G2100	24.5543	12.735	1.08278	2.23e-05	0.0247927	0.0109943	up
Gh_D05G2691	80.1768	37.8014	1.07397	5.75258e-39	2.82153e-06	3.78527e-06	up	Gh_D13G0868	27.2286	12.5168	1.00805	1.121e-41	0.0209479	0.0359868	up	Gh_D08G2448	32.5102	16.9386	1.07427	0.000485995	0.00718904	0.00248487	up
Gh_D02G1228	50.5639	24.7913	1.02384	6.95995e-39	0.000564371	0.000940073	up	Gh_A06G0025	29.358	13.7298	1.00624	1.04055e-38	0.0157876	0.027112	up	Gh_D05G3022	85.3077	44.2094	1.07302	5.54e-06	5.22e-07	3.34e-08	up
Gh_D03G1599	107.87	49.8572	1.11333	2.37099e-39	1.57375e-08	1.09809e-08	up	Gh_A11G2020	29.0508	13.6754	1.00624	1.04055e-38	0.0157876	0.027112	up	Gh_D01G2291	26.4295	13.3414	1.08491	0.000308835	0.0205982	0.00883783	up
Gh_D06G0006	203.296	90.6177	1.16412	1.41402e-39	6.87867e-14	1.64155e-16	up	Gh_D08G0893	29.4803	13.6962	1.00624	1.04055e-38	0.0157876	0.027112	up	Gh_A07G2025	22.4178	11.3542	1.07523	0.000418679	0.0438337	0.0216934	up
Gh_A02G0006	62.4395	30.4078	1.04483	7.1423e-40	7.8903e-05	0.000127056	up	Gh_D10G0255	29.3511	14.2758	1.00624	1.04055e-38	0.0157876	0.027112	up	Gh_D02G0964	1805.66	771.115	1.36513	5.02e-06	1.01e-97	7.87e-249	up
Gh_A09G1299	61.5001	29.964	1.04483	7.1423e-40	7.8903e-05	0.000127056	up	Gh_D07G1918	30.6194	15.1465	1.00467	7.56904e-38	0.0121304	0.0204395	up	Gh_D04G0312	42.7191	22.3013	1.07377	5.54e-06	0.00113572	0.000278524	up
Gh_A09G2378	52.9942	26.3945	1.02331	1.64367e-38	0.000416255	0.000697768	up	Gh_D10G1116	30.788	15.2437	1.00467	7.56904e-38	0.0121304	0.0204395	up	Gh_A12G1633	297.042	150.082	1.12003	2.61e-07	2.12e-25	2.86e-30	up
Gh_D01G0162	53.1597	25.7809	1.02331	1.64367e-38	0.000416255	0.000697768	up	Gh_D03G1282	33.1898	15.5029	1.00328	3.21957e-38	0.00924726	0.0152529	up	Gh_A05G1782	29.1217	14.7605	1.09045	1.56e-05	0.0117348	0.00446214	up
Gh_A12G1098	1738.6	729.568	1.26265	1.36187e-38	1.0399e-15	6.39341e-19	up	Gh_A03G1770	79.6354	37.3277	1.08382	1.81259e-41	3.54281e-06	2.29001e-06	up	Gh_A11G1542	29.0038	14.7815	1.09045	1.56e-05	0.0117348	0.00446214	up
Gh_A06G0050	326.772	139.785	1.23267	5.84907e-39	2.90299e-15	3.27543e-23	up	Gh_A05G1195	82.0742	38.1159	1.08127	4.39586e-38	2.77182e-06	1.71278e-06	up	Gh_D02G0618	28.5616	14.9286	1.09045	1.56e-05	0.0117348	0.00446214	up
Gh_D05G1113	141.153	63.0312	1.16624	1.11179e-39	2.79054e-11	4.35946e-12	up	Gh_A13G1122	51.097	24.1132	1.05341	5.6213e-38	0.000421417	0.000532344	up	Gh_D06G0149	29.3452	14.9282	1.09045	1.56e-05	0.0117348	0.00446214	up
Gh_D06G1386	49.4432	23.7239	1.02441	2.50479e-40	0.000754481	0.0012765	up	Gh_A12G0827	53.1627	25.3803	1.05067	1.16761e-41	0.000318766	0.000397749	up	Gh_D01G0551	26.9066	13.8551	1.08689	1.82e-05	0.0169725	0.00699998	up
Gh_D11G3519	48.7868	23.5458	1.02441	2.50479e-40	0.000754481	0.0012765	up	Gh_D07G1653	54.5603	26.3696	1.04813	1.5846e-39	0.000244617	0.000298482	up	Gh_D04G0767	26.8343	13.7742	1.08689	1.82e-05	0.0169725	0.00699998	up
Gh_A12G1940	238.115	103.307	1.21567	6.32012e-40	1.61832e-15	6.40525e-20	up	Gh_D02G0812	156.088	68.9101	1.15326	1.02487e-38	2.17024e-11	1.68725e-13	up	Gh_D08G0355	38.3054	19.098	1.10189	7.62e-06	0.00211341	0.000567882	up
Gh_D08G1815	67.284	32.4643	1.06424	1.75535e-39	2.70799e-05	4.00891e-05	up	Gh_D11G1279	66.3504	30.6061	1.05967	1.89329e-39	4.19956e-05	4.07237e-05	up	Gh_A03G2099	166.35	83.8881	1.12208	2.58e-10	1.84e-14	5.45e-17	up
Gh_D12G2121	346.694	147.656	1.23831	1.83671e-39	8.86259e-15	1.38829e-23	up	Gh_D10G0192	154.113	67.6859	1.1556	5.72275e-38	2.47429e-11	2.24763e-13	up	Gh_D04G0855	100.968	52.0553	1.08333	4.52e-06	2.05e-08	7.46e-10	up
Gh_A03G1219	622.188	263.857	1.24631	2.50209e-39	7.95789e-15	1.03082e-22	up	Gh_A01G0170	110.676	50.7103	1.09628	2.43413e-41	3.15146e-08	6.51858e-09	up	Gh_D11G2658	42.5199	21.8115	1.08932	0.000189527	0.00105273	0.000252117	up
Gh_D05G2948	65.1986	30.7643	1.06593	6.96396e-40	3.63081e-05	5.39165e-05	up	Gh_A09G1374	131.719	58.5889	1.13705	2.77523e-38	6.37314e-10	3.29593e-11	up	Gh_D05G1245	92.717	48.4435	1.07861	8.39e-07	1.04e-07	5.02e-09	up
Gh_A13G0951	129.335	57.925	1.15659	4.3155e-40	2.0055e-10	5.87759e-11	up	Gh_A05G0516	175.196	76.4741	1.18026	1.15762e-37	1.15695e-12	1.11727e-15	up	Gh_A04G0240	353.185	180.774	1.10297	6.12e-07	4.74e-29	4.01e-35	up
Gh_A12G1062	426.628	182.499	1.23974	2.04013e-39	1.44533e-14	1.27224e-23	up	Gh_D08G1149	81.0128	37.3595	1.10164	1.71478e-38	2.22213e-06	1.30485e-06	up	Gh_D08G2193	36.3022	18.4551	1.09983	4.42e-05	0.00310689	0.00090487	up
Gh_A01G0170	111.864	50.7103	1.1373	9.43286e-40	4.55064e-09	2.57506e-09	up	Gh_D11G1041	248.022	105.909	1.20508	5.90748e-39	3.52483e-15	2.31913e-22	up	Gh_D05G0112	48.0712	24.8067	1.08047	2.17e-05	0.000422247	8.77e-05	up
Gh_A05G0717	95.9858	43.8964	1.12664	2.07772e-39	7.42529e-08	6.60638e-08	up	Gh_D05G0826	56.2098	26.4956	1.07389	3.66901e-39	0.000153613	0.000173384	up	Gh_A02G0283	391.212	196.972	1.12824	1.3e-07	7.76e-33	2.68e-40	up
Gh_A04G1079	55.8617	26.6923	1.04859	6.17209e-42	0.000190509	0.000304658	up	Gh_D01G1278	36.4897	16.6337	1.04213	6.86267e-39	0.00444483	0.00680381	up	Gh_D09G0237	187.682	94.8814	1.12409	2.51e-06	2.19e-16	2.81e-19	up
Gh_A10G1355	356.864	151.486	1.2504	1.80208e-39	1.01447e-14	4.66897e-24	up	Gh_A06G0628	45.0364	21.3155	1.06314	1.30322e-39	0.000938937	0.00126046	up	Gh_A05G3980	126.141	63.8172	1.11664	2.56e-06	6.18e-11	7.89e-13	up
Gh_A05G2385	352.865	149.869	1.24371	7.54125e-40	1.3688e-14	8.41111e-24	up	Gh_D01G1920	45.423	21.4729	1.06314	1.30322e-39	0.000938937	0.00126046	up	Gh_D12G1593	33.7892	17.4438	1.09754	9.66e-06	0.00456708	0.00143214	up
Gh_D12G1185	371.241	157.076	1.24978	4.39432e-39	1.01447e-14	4.49473e-24	up	Gh_A11G0380	157.751	69.0713	1.1716	9.8104e-39	9.25625e-12	5.0502e-14	up	Gh_A13G1237	80.7226	41.8203	1.08689	1.85e-05	8.15e-07	5.61e-08	up
Gh_D04G1703	108.259	48.7115	1.14218	8.94242e-42	7.53232e-09	4.67883e-09	up	Gh_D05G1665	226.787	97.9554	1.19027	5.41215e-39	1.68507e-14	2.76589e-20	up	Gh_D01G2010	39.3599	19.887	1.10283	4.34e-05	0.00173922	0.000454751	up
Gh_A08G0649	54.4436	26.384	1.05003	1.4249e-39	0.000255713	0.000408866	up	Gh_A11G2307	268.697	113.039	1.23036	4.53335e-38	5.70271e-16	8.60546e-25	up	Gh_A02G0711	30.3366	15.0042	1.09206	3.52e-05	0.00972352	0.0035463	up
Gh_D09G2119	155.786	68.0541	1.20241	1.06371e-41	1.10066e-12	6.09232e-14	up	Gh_A11G1774	229.895	99.4544	1.19462	5.41332e-39	1.18269e-14	1.23185e-20	up	Gh_D12G1258	880.017	417.492	1.21434	8.29e-13	6.6e-58	1.2e-101	up
Gh_A11G0166	64.3762	29.5062	1.09028	2.7233e-40	2.96097e-05	4.18836e-05	up	Gh_A01G1606	104.122	46.6851	1.11935	6.69472e-39	4.72704e-08	1.1826e-08	up	Gh_A13G1122	46.6354	24.1132	1.07924	6.68e-05	0.000512745	0.000110023	up
Gh_D02G1619	64.4167	29.618	1.09028	2.7233e-40	2.96097e-05	4.18836e-05	up	Gh_D08G1228	325.344	133.832	1.2579	6.81602e-39	8.60204e-17	1.02435e-29	up	Gh_A08G1234	114.761	57.9504	1.12687	5.36e-07	3.95e-10	7.06e-12	up
Gh_A03G0003	42.9172	20.62	1.02643	3.79381e-39	0.00185718	0.00311629	up	Gh_A09G2368	416.782	176.017	1.22478	2.05631e-37	9.99346e-16	3.96892e-32	up	Gh_A10G0589	35.2439	17.7652	1.09872	0.000155283	0.00378213	0.00113369	up
Gh_A13G1942	43.2427	21.0975	1.02643	3.79381e-39	0.00185718	0.00311629	up	Gh_A03G1284	79.7589	35.7401	1.12282	1.604e-38	1.76426e-06	9.79233e-07	up	Gh_A07G1327	154.35	77.2366	1.13002	1.31e-06	1.46e-13	6.14e-16	up
Gh_D03G0905	42.7693	21.249	1.02643	3.79381e-39	0.00185718	0.00311629	up	Gh_A02G0653	70.4238	32.1235	1.09887	1.38483e-38	1.24622e-05	1.00338e-05	up	Gh_D08G2596	176.519	88.3772	1.13528	8.37e-06	1.28e-15	2.24e-18	up
Gh_D13G0688	97.056	44.4783	1.14152	3.46358e-40	4.47886e-08	3.67391e-08	up	Gh_A07G0773	166.662	71.5819	1.19038	4.1388e-39	1.77234e-12	3.34699e-15	up	Gh_D12G1659	97.2579	49.5323	1.09542	6.25e-06	3.19e-08	1.24e-09	up
Gh_A08G0016	71.4695	33.3675	1.10359	4.04507e-39	7.23536e-06	9.70569e-06	up	Gh_D06G0343	91.4921	41.4682	1.12244	3.26624e-38	3.21965e-07	1.26489e-07	up	Gh_D05G0937	53.4168	26.7431	1.11239	1.73e-05	0.000109973	1.76e-05	up
Gh_D02G1885	49.6068	24.4389	1.05326	1.75899e-39	0.000464146	0.000745615	up	Gh_D06G1987	29.8119	13.9643	1.05434	4.7077e-38	0.0100859	0.0160818	up	Gh_A05G1776	173.41	86.7299	1.13104	2.23e-07	3.13e-15	6.54e-18	up
Gh_A13G0659	36.5038	17.6905	1.02911	4.12657e-42	0.00453473	0.00761122	up	Gh_D12G0245	30.047	13.648	1.05434	4.7077e-38	0.0100859	0.0160818	up	Gh_A08G2381	173.25	86.6846	1.13104	2.23e-07	3.13e-15	6.54e-18	up
Gh_D09G1193	37.4202	18.2494	1.02911	4.12657e-42	0.00453473	0.00761122	up	Gh_D05G1766	58.7606	27.4661	1.0951	2.07794e-38	7.34252e-05	7.55468e-05	up	Gh_D05G3434	2894.78	1176.49	1.43662	1.57e-10	8.13e-108	0	up
Gh_D06G1835	66.2801	30.7916	1.0878	2.74927e-40	2.20571e-05	3.10764e-05	up	Gh_D07G1085	28.3834	13.0573	1.05958	9.76673e-39	0.0131368	0.0214432	up	Gh_D08G2397	45.7246	23.2217	1.10833	7.21e-05	0.000438176	9.02e-05	up
Gh_D05G1729	751.929	303.314	1.32146	2.45458e-41	1.20861e-16	1.30581e-24	up	Gh_D12G1847	27.9142	12.5096	1.05958	9.76673e-39	0.0131368	0.0214432	up	Gh_D05G3468	541.942	260.802	1.19334	6.46e-08	1.68e-45	6.53e-61	up
Gh_A05G1394	46.1812	22.0584	1.05706	4.96514e-42	0.000840173	0.00135764	up	Gh_D12G0788	26.2997	12.0949	1.06564	1.04409e-41	0.0171859	0.0284301	up	Gh_D10G0162	84.4643	42.8645	1.10541	6.77e-06	3.07e-07	1.76e-08	up
Gh_A06G1403	57.049	27.3048	1.0739	2.43379e-40	0.000116305	0.000181777	up	Gh_A01G0879	195.886	83.9913	1.19996	1.10027e-38	8.45943e-14	5.95282e-18	up	Gh_A06G0221	59.7148	30.1581	1.11551	4.98e-09	2.7e-05	3.36e-06	up
Gh_D05G0190	86.6347	39.815	1.12123	3.13779e-40	3.56259e-07	3.76607e-07	up	Gh_A11G0263	23.7776	10.8244	1.07272	5.37864e-38	0.0228122	0.0376489	up	Gh_A02G0875	79.1693	40.1411	1.10329	2.42e-07	8.45e-07	5.8e-08	up
Gh_A08G0058	50.6268	23.5231	1.08155	5.2661e-40	0.000281766	0.000430017	up	Gh_D02G0715	46.3587	20.695	1.0945	1.66893e-38	0.000584725	0.000731603	up	Gh_D13G0168	61.0579	30.8385	1.1159	3.66e-05	2.21e-05	2.65e-06	up
Gh_A05G0679	90.9027	40.8	1.15055	8.31311e-39	1.01113e-07	9.07662e-08	up	Gh_A10G1862	150.073	63.6665	1.20455	8.66047e-39	7.76981e-12	6.01356e-14	up	Gh_A05G0742	25.3174	12.1886	1.13936	0.000125116	0.0175024	0.00719631	up
Gh_A03G2171	882.639	361.284	1.30056	6.63719e-38	3.71045e-16	4.15752e-23	up	Gh_A05G0547	21.7351	10.1503	1.08111	1.08647e-38	0.0298004	0.0495695	up	Gh_D12G0788	25.0546	12.0949	1.13936	0.000125116	0.0175024	0.00719631	up
Gh_A12G0687	125.718	54.5525	1.1987	2.8453e-39	8.92862e-11	2.27023e-11	up	Gh_D12G2714	22.2789	10.2489	1.08111	1.08647e-38	0.0298004	0.0495695	up	Gh_A01G0577	58.6591	29.8937	1.11511	7.48e-05	3.3e-05	4.23e-06	up
Gh_D08G1788	2957.42	1208.98	1.30073	2.71018e-38	9.45828e-17	5.38629e-18	up	Gh_D01G1252	43.5166	19.7113	1.09979	4.5152e-38	0.000755816	0.000968554	up	Gh_D11G0488	58.9849	29.7354	1.11511	7.48e-05	3.3e-05	4.23e-06	up
Gh_D02G1225	1395.07	541.275	1.37687	1.00408e-38	2.53494e-18	1.45962e-23	up	Gh_A13G0554	42.3953	19.119	1.10559	1.15812e-39	0.000999024	0.00128674	up	Gh_D08G1960	178.036	87.8942	1.15566	2.66e-06	3.56e-16	4.79e-19	up
Gh_D05G3681	41.583	20.2886	1.06159	1.79537e-40	0.00153354	0.00246194	up	Gh_D07G0803	61.6511	28.0847	1.11455	3.90735e-38	3.5325e-05	3.17714e-05	up	Gh_D12G2260	108.484	54.3382	1.12606	1.9e-05	1.66e-09	3.71e-11	up
Gh_A07G0308	162.97	69.2984	1.24471	4.18992e-40	9.57799e-14	2.31482e-15	up	Gh_A02G1292	20.2446	9.06184	1.0912	3.40632e-39	0.0390543	0.0652936	up	Gh_A12G0641	47.1069	23.9227	1.10899	8.87e-09	0.000359774	7.18e-05	up
Gh_A12G1027	1091.89	444.064	1.30858	1.16302e-39	2.08001e-16	2.32475e-22	up	Gh_A02G1382	20.3127	9.37755	1.0912	3.40632e-39	0.0390543	0.0652936	up	Gh_A11G2272	24.314	11.5394	1.13936	0.000112705	0.0210721	0.00904812	up
Gh_D12G2834	72.5341	32.8139	1.1434	2.02963e-39	2.61011e-06	3.06248e-06	up	Gh_A05G2405	19.6873	8.67213	1.0912	3.40632e-39	0.0390543	0.0652936	up	Gh_D11G1095	79.5175	39.6023	1.13032	3.82e-05	4.38e-07	2.62e-08	up
Gh_D12G0693	44.4033	21.4802	1.05922	3.02404e-39	0.00113681	0.00183032	up	Gh_A07G1189	19.8971	8.85813	1.0912	3.40632e-39	0.0390543	0.0652936	up	Gh_A08G1803	102.852	51.7102	1.12542	6.31e-07	4.55e-09	1.21e-10	up
Gh_D05G2200	68.4646	31.3086	1.13055	2.51258e-40	7.78342e-06	9.91253e-06	up	Gh_D10G1353	20.2745	8.71925	1.0912	3.40632e-39	0.0390543	0.0652936	up	Gh_D05G1695	208.171	103.036	1.14631	1.08e-10	1.25e-18	5.71e-22	up
Gh_A09G2507	70.2729	32.2445	1.12699	6.03638e-40	5.75622e-06	7.34682e-06	up	Gh_D12G1439	20.0706	9.42681	1.0912	3.40632e-39	0.0390543	0.0652936	up	Gh_D07G0886	116.901	57.597	1.15174	4.99e-07	1.24e-10	1.71e-12	up
Gh_A10G2089	265.905	109.125	1.29479	5.43665e-40	2.1646e-17	1.13861e-23	up	Gh_D13G1695	40.1015	17.503	1.11199	8.64319e-42	0.00130517	0.00171546	up	Gh_D08G1868	40.582	20.3548	1.13936	3.16e-05	0.000820816	0.000184816	up
Gh_D07G0806	83.1529	37.2796	1.16474	1.59456e-39	3e-07	2.87663e-07	up	Gh_A01G1001	36.8335	17.1239	1.08113	8.78397e-38	0.00280061	0.00396494	up	Gh_A11G2610	38.1054	18.9624	1.13936	0.000110433	0.00147659	0.000368202	up
Gh_A05G3886	236.039	97.0592	1.2897	1.19014e-39	3.99714e-17	6.3461e-22	up	Gh_D01G0399	37.3376	17.0608	1.08113	8.78397e-38	0.00280061	0.00396494	up	Gh_A01G2159	22.155	10.953	1.13936	5.41e-08	0.0308244	0.0142193	up
Gh_A11G1085	39.9598	19.4833	1.0642	4.31707e-39	0.00207056	0.003319	up	Gh_D05G0192	37.175	16.5338	1.08113	8.78397e-38	0.00280061	0.00396494	up	Gh_A02G0554	22.2383	10.9512	1.13936	5.41e-08	0.0308244	0.0142193	up
Gh_A07G0897	86.7199	39.3528	1.1573	7.42077e-39	1.71675e-07	1.6113e-07	up	Gh_A11G1873	35.2319	15.7593	1.08694	2.66638e-39	0.00365742	0.00528111	up	Gh_A06G0830	21.5554	10.8599	1.13936	5.41e-08	0.0308244	0.0142193	up
Gh_A09G2487	33.4226	15.9055	1.03144	1.33785e-40	0.00808416	0.0135274	up	Gh_A04G0893	68.6812	30.6309	1.12334	4.04109e-39	9.87059e-06	7.58068e-06	up	Gh_A09G1388	22.3893	10.539	1.13936	5.41e-08	0.0308244	0.0142193	up
Gh_A12G1993	32.9179	15.7288	1.03144	1.33785e-40	0.00808416	0.0135274	up	Gh_D04G1703	111.333	48.7115	1.15344	2.08648e-41	7.43675e-09	1.10844e-09	up	Gh_A06G1376	28.73	14.2146	1.13936	0.000207842	0.00832682	0.0029178	up
Gh_D10G2532	33.1014	15.726	1.03144	1.33785e-40	0.00808416	0.0135274	up	Gh_D11G3469	217.134	91.5011	1.21607	4.75451e-39	9.29249e-15	3.58691e-20	up	Gh_D01G1530	63.2617	31.3574	1.13936	1.12e-05	1.02e-05	1.04e-06	up
Gh_D12G0195	131.097	56.2623	1.22891	1.9866e-39	1.67329e-11	2.68709e-12	up	Gh_D13G2144	122.267	53.4386	1.17714	4.01105e-38	7.88071e-10	5.6366e-11	up	Gh_D07G1908	39.7114	19.7504	1.13936	3.97e-05	0.00100539	0.000233067	up
Gh_D03G1740	66.7373	30.336	1.15588	2.33519e-40	6.16774e-06	7.40581e-06	up	Gh_A13G0065	345.525	140.115	1.28515	1.62903e-37	2.1182e-17	4.23401e-32	up	Gh_A04G1211	103.968	52.13	1.12555	5.29e-06	3.74e-09	9.56e-11	up
Gh_D12G2170	49.9107	23.3645	1.11338	1.92243e-40	0.000229256	0.00032994	up	Gh_A10G1895	58.4425	26.4865	1.12409	1.05387e-38	5.93136e-05	5.6967e-05	up	Gh_A11G2020	27.6569	13.6754	1.13936	1.6e-05	0.0100471	0.00364001	up
Gh_A05G0128	95.5878	42.3186	1.19298	4.01863e-39	1.68637e-08	1.10021e-08	up	Gh_A04G1294	492.005	199.273	1.28635	1.90906e-38	4.8077e-17	3.78482e-36	up	Gh_A01G2025	25.6467	12.7284	1.13936	3.64e-05	0.0146273	0.00571086	up
Gh_A02G1385	25.4442	11.9721	1.03831	7.39846e-40	0.0258133	0.0430752	up	Gh_A05G0777	33.3833	15.3137	1.09348	2.7475e-38	0.0047683	0.00703208	up	Gh_A11G1133	27.3279	13.1815	1.13936	0.000243387	0.0120991	0.0045805	up
Gh_A03G0956	25.0039	12.2752	1.03831	7.39846e-40	0.0258133	0.0430752	up	Gh_D02G0983	32.941	15.0874	1.09348	2.7475e-38	0.0047683	0.00703208	up	Gh_D01G0664	26.5718	13.1884	1.13936	0.000243387	0.0120991	0.0045805	up
Gh_A05G2140	25.0413	11.7664	1.03831	7.39846e-40	0.0258133	0.0430752	up	Gh_D01G0183	215.005	89.8763	1.23428	1.06721e-38	4.65984e-15	1.74459e-20	up	Gh_D08G1427	44.1976	21.9932	1.13936	3.07e-05	0.000451505	9.21e-05	up
Gh_A09G1354	24.7975	12.1679	1.03831	7.39846e-40	0.0258133	0.0430752	up	Gh_D10G2071	40.6269	17.9639	1.14719	1.43989e-38	0.000797006	0.000969674	up	Gh_D04G0760	42.4227	20.5467	1.13936	4.18e-05	0.000674217	0.00014781	up
Gh_A09G2320	25.385	12.1668	1.03831	7.39846e-40	0.0258133	0.0430752	up	Gh_D06G1519	49.9254	22.4007	1.14798	8.77532e-39	0.00016794	0.000176491	up	Gh_A12G0460	23.2652	11.4265	1.13936	0.00035815	0.0256736	0.0113136	up
Gh_A06G1529	57.0795	25.6196	1.12734	4.93713e-40	5.7758e-05	7.88826e-05	up	Gh_A07G0897	89.8279	39.3528	1.17784	2.05752e-39	1.16923e-07	3.74478e-08	up	Gh_A09G2043	33.833	16.6052	1.13936	0.000147284	0.00320788	0.000926016	up
Gh_A11G0900	57.3309	25.9681	1.12734	4.93713e-40	5.7758e-05	7.88826e-05	up	Gh_A09G1776	28.9344	13.1834	1.10934	8.76329e-39	0.0082653	0.0124005	up	Gh_A13G0935	33.6121	16.5979	1.13936	0.000147284	0.00320788	0.000926016	up
Gh_A08G2548	58.8354	27.1473	1.12324	1.21723e-39	4.28807e-05	5.81671e-05	up	Gh_A13G2331	201.818	83.012	1.2606	4.12958e-39	3.99617e-15	5.15422e-20	up	Gh_A06G0587	31.9304	15.6834	1.13936	0.000110077	0.00469835	0.0014626	up
Gh_D04G0267	27.1012	13.1086	1.03621	6.02388e-40	0.0194255	0.0326848	up	Gh_A02G0370	27.0878	11.8757	1.11908	2.87299e-39	0.0107626	0.0164442	up	Gh_A10G1183	32.2755	15.5949	1.13936	0.000110077	0.00469835	0.0014626	up
Gh_D13G2077	27.0772	12.5101	1.03621	6.02388e-40	0.0194255	0.0326848	up	Gh_A06G0705	27.0317	12.063	1.11908	2.87299e-39	0.0107626	0.0164442	up	Gh_D01G0460	122.003	59.6758	1.16321	8.62e-08	3.12e-11	3.21e-13	up
Gh_A02G0638	44.7431	20.6934	1.09128	1.30242e-39	0.000688717	0.0010521	up	Gh_A01G1717	63.5291	27.6793	1.16	1.08882e-41	1.313e-05	1.00148e-05	up	Gh_A10G1465	233.563	112.578	1.18953	5.17e-07	4.38e-22	3.81e-26	up
Gh_A06G1047	44.9795	21.4192	1.09128	1.30242e-39	0.000688717	0.0010521	up	Gh_A13G1774	206.254	84.9724	1.25469	9.92724e-39	3.77998e-15	3.16394e-20	up	Gh_D05G1804	71.4047	34.7142	1.15982	9.94e-06	1.4e-06	9.83e-08	up
Gh_A05G0223	29.0047	13.9099	1.0344	2.95037e-39	0.0145705	0.0242629	up	Gh_D12G2691	61.8239	26.7913	1.16608	3.43674e-38	1.69822e-05	1.34111e-05	up	Gh_A06G0706	70.289	34.1449	1.16012	8.64e-06	1.71e-06	1.24e-07	up
Gh_D11G2754	29.4904	13.9525	1.0344	2.95037e-39	0.0145705	0.0242629	up	Gh_A01G1909	24.6336	11.3188	1.13044	9.4366e-42	0.0139605	0.0218005	up	Gh_A05G3394	50.0147	24.5722	1.13936	1.88e-05	0.000138436	2.28e-05	up
Gh_D13G2387	29.006	14.1227	1.0344	2.95037e-39	0.0145705	0.0242629	up	Gh_A10G1680	24.7202	10.9863	1.13044	9.4366e-42	0.0139605	0.0218005	up	Gh_A06G0810	242.106	115.525	1.20023	7.74e-08	4.15e-23	2.08e-27	up
Gh_D10G1656	143.452	59.5436	1.25633	8.26412e-40	1.05199e-12	7.79996e-14	up	Gh_A11G0273	25.2199	10.6409	1.13044	9.4366e-42	0.0139605	0.0218005	up	Gh_D09G0530	177.054	85.6235	1.1807	1.07e-06	1.37e-16	1.47e-19	up
Gh_D03G1859	278.806	111.345	1.3375	1.20867e-39	2.46704e-18	1.28129e-25	up	Gh_A11G0395	24.7441	10.7969	1.13044	9.4366e-42	0.0139605	0.0218005	up	Gh_A05G1428	128.029	62.8993	1.16208	2.1e-06	9.25e-12	7.6e-14	up
Gh_D08G1189	370.6	146.823	1.34454	3.41645e-39	8.0874e-17	1.39958e-27	up	Gh_D12G0881	84.2964	36.417	1.1928	1.41184e-41	2.45001e-07	8.99162e-08	up	Gh_A07G0444	56.0842	27.1209	1.16536	1.74e-05	2.85e-05	3.46e-06	up
Gh_D13G2368	157.607	64.8997	1.28537	2.08755e-39	4.03115e-14	9.50921e-16	up	Gh_A08G1555	79.8598	33.8832	1.20412	1.32105e-41	3.98956e-07	1.58418e-07	up	Gh_D02G2222	56.1467	27.4196	1.16536	1.74e-05	2.85e-05	3.46e-06	up
Gh_D03G1444	31.0664	15.2793	1.03283	9.14956e-40	0.010855	0.0180566	up	Gh_D06G1386	55.3196	23.7239	1.16134	1.20552e-39	6.08739e-05	5.65543e-05	up	Gh_A05G0585	158.752	76.9425	1.18545	1.33e-06	5.21e-15	1.09e-17	up
Gh_D07G0761	31.3583	15.04	1.03283	9.14956e-40	0.010855	0.0180566	up	Gh_A08G2100	22.9884	10.0267	1.14385	9.47649e-42	0.0183608	0.0287356	up	Gh_D13G0787	39.8059	19.0598	1.17589	6.36e-06	0.000689816	0.000148575	up
Gh_A04G0698	52.763	23.9164	1.13652	1.09529e-39	0.000103039	0.000143846	up	Gh_A09G1843	23.2249	10.4282	1.14385	9.47649e-42	0.0183608	0.0287356	up	Gh_D01G1278	34.5276	16.6337	1.16042	0.000396098	0.00242949	0.000654797	up
Gh_A03G1376	35.9206	16.644	1.07029	1.02308e-39	0.00375848	0.00598141	up	Gh_D05G0437	23.2104	10.4742	1.14385	9.47649e-42	0.0183608	0.0287356	up	Gh_D05G1184	80.5156	39.4994	1.1665	7.97e-05	1.67e-07	8.14e-09	up
Gh_A04G0707	36.317	17.1368	1.07029	1.02308e-39	0.00375848	0.00598141	up	Gh_A01G0845	223.382	91.4269	1.27107	3.20084e-38	5.70271e-16	3.2959e-22	up	Gh_A13G0607	52.9403	25.5488	1.16684	1.64e-05	5.23e-05	7.04e-06	up
Gh_D13G1732	1682.92	646.767	1.38954	2.98056e-39	7.30799e-19	4.15752e-23	up	Gh_D02G0786	118.407	50.415	1.21248	2.51124e-39	5.4967e-10	3.85373e-11	up	Gh_A08G0792	39.4258	18.8401	1.17684	0.000101004	0.000839232	0.000185617	up
Gh_A05G1751	39.4275	17.506	1.10408	8.24921e-40	0.00168729	0.00257412	up	Gh_A09G0209	53.1333	23.023	1.16851	2.74785e-39	7.88709e-05	7.5187e-05	up	Gh_D04G1623	271.192	128.249	1.21587	3.3e-07	2.87e-26	2.68e-31	up
Gh_A09G0145	39.3167	17.6663	1.10408	8.24921e-40	0.00168729	0.00257412	up	Gh_D04G1397	52.9644	22.7645	1.16851	2.74785e-39	7.88709e-05	7.5187e-05	up	Gh_D03G1747	52.1959	25.2728	1.16738	2.07e-05	6.38e-05	8.89e-06	up
Gh_D11G3395	39.2023	17.8579	1.10408	8.24921e-40	0.00168729	0.00257412	up	Gh_D02G0433	43.8539	18.967	1.17194	1.02411e-39	0.00037413	0.000408513	up	Gh_A11G2109	129.27	62.4955	1.1848	5.65e-10	3.41e-12	2.32e-14	up
Gh_D02G1456	91.5461	40.3285	1.20143	1.50844e-39	2.83198e-08	1.97643e-08	up	Gh_D05G2486	50.7442	22.0031	1.17627	2.63287e-39	0.000101712	9.99828e-05	up	Gh_A08G2230	151.005	72.8141	1.18794	1.5e-06	2.6e-14	7.29e-17	up
Gh_A11G3262	78.0212	33.9917	1.19593	2.36385e-40	4.0803e-07	3.78838e-07	up	Gh_A05G0679	96.3143	40.8	1.19923	1.53822e-38	2.67677e-08	6.14748e-09	up	Gh_A10G1695	102.221	49.9581	1.16793	4.14e-06	1.79e-09	3.84e-11	up
Gh_D12G0097	107.89	46.0537	1.23238	1.13529e-38	7.44876e-10	2.96773e-10	up	Gh_A12G0086	20.8149	8.88831	1.15991	1.64555e-38	0.0242122	0.0376544	up	Gh_D03G1109	64.9751	31.3592	1.18445	1.02e-05	3.17e-06	2.52e-07	up
Gh_D01G0457	20.7425	10.3156	1.04369	5.65351e-40	0.046194	0.0759343	up	Gh_D03G0895	21.347	9.47321	1.15991	1.64555e-38	0.0242122	0.0376544	up	Gh_A13G1359	115.848	55.8498	1.18999	7.42e-06	4.77e-11	5.13e-13	up
Gh_A01G2116	49.1556	21.6946	1.14726	1.72737e-40	0.000185008	0.000254962	up	Gh_D08G1343	20.9342	8.93083	1.15991	1.64555e-38	0.0242122	0.0376544	up	Gh_A05G3692	118.12	56.9024	1.18911	1.36e-05	3.21e-11	3.2e-13	up
Gh_A02G0971	177.688	72.5375	1.29079	8.85533e-42	2.57036e-15	1.21209e-17	up	Gh_D08G1604	20.6848	9.46187	1.15991	1.64555e-38	0.0242122	0.0376544	up	Gh_D11G2617	234.071	111.466	1.20881	1.91e-08	1.34e-22	8.65e-27	up
Gh_D13G0465	96.1558	41.1442	1.22733	6.21617e-40	7.74173e-09	4.36024e-09	up	Gh_D10G2162	20.8213	9.34293	1.15991	1.64555e-38	0.0242122	0.0376544	up	Gh_D13G2340	50.8554	24.7992	1.16793	2.24e-05	7.77e-05	1.13e-05	up
Gh_D12G1841	295.906	116.22	1.35951	3.77189e-39	1.06982e-18	5.25546e-27	up	Gh_D11G0579	20.9894	9.36335	1.15991	1.64555e-38	0.0242122	0.0376544	up	Gh_A07G1291	47.743	23.232	1.16973	6.12e-05	0.000141498	2.3e-05	up
Gh_A04G0708	31.5554	15.2134	1.07791	4.54399e-39	0.00668871	0.0108033	up	Gh_A01G0139	123.748	51.8543	1.22774	1.95732e-41	1.40627e-10	6.22948e-12	up	Gh_A03G0419	37.5917	18.0021	1.17783	3.59e-05	0.00102664	0.000234322	up
Gh_D08G2546	32.3265	15.2811	1.07791	4.54399e-39	0.00668871	0.0108033	up	Gh_D13G1915	93.5841	39.7816	1.20419	1.49577e-38	3.37198e-08	8.16492e-09	up	Gh_D13G1668	429.529	202.449	1.22398	0.0144937	3.95e-40	3.94e-50	up
Gh_D13G0270	31.5075	15.2972	1.07791	4.54399e-39	0.00668871	0.0108033	up	Gh_D02G0232	42.3153	18.4615	1.18154	9.93003e-40	0.000487322	0.000542986	up	Gh_A04G0369	26.1393	12.0344	1.19594	0.000128862	0.010234	0.00364495	up
Gh_D13G1915	92.6706	39.7816	1.21694	2.52306e-40	1.70518e-08	1.073e-08	up	Gh_D02G0507	151.645	62.2139	1.26907	2.25537e-38	6.85889e-13	2.2056e-15	up	Gh_A08G2344	25.8502	12.2599	1.19594	0.000128862	0.010234	0.00364495	up
Gh_A08G0014	44.4412	20.2563	1.12793	1.51032e-40	0.000562934	0.000800107	up	Gh_A06G1130	38.9958	17.3255	1.15609	7.28181e-39	0.00104768	0.00128411	up	Gh_A05G2086	70.5023	33.6148	1.19145	6.17e-05	8.56e-07	5.44e-08	up
Gh_A12G2428	44.3507	20.2258	1.12793	1.51032e-40	0.000562934	0.000800107	up	Gh_A10G1843	31.8676	14.0619	1.14597	7.86217e-42	0.00385198	0.00531014	up	Gh_A12G0583	48.6567	23.824	1.16911	7.7e-09	0.000116083	1.81e-05	up
Gh_A10G1978	51.9089	22.5471	1.16942	2.41654e-39	8.23689e-05	0.000107392	up	Gh_A02G0339	19.4487	8.49855	1.17951	2.65774e-39	0.0313976	0.0495695	up	Gh_A09G1519	19.5305	9.09206	1.17684	0.00139294	0.0415588	0.0200309	up
Gh_D07G0353	130.632	53.9365	1.28091	2.30723e-39	3.33886e-12	3.83208e-13	up	Gh_A10G0956	18.6787	7.82151	1.17951	2.65774e-39	0.0313976	0.0495695	up	Gh_D03G0895	19.5159	9.47321	1.17684	0.00139294	0.0415588	0.0200309	up
Gh_A13G0352	76.9678	33.479	1.21986	2.21669e-40	3.22239e-07	2.78833e-07	up	Gh_D08G0811	19.3286	7.68746	1.17951	2.65774e-39	0.0313976	0.0495695	up	Gh_A07G1000	29.2055	13.9398	1.18999	1.42e-05	0.00580771	0.00184134	up
Gh_D10G1174	76.5815	33.478	1.21986	2.21669e-40	3.22239e-07	2.78833e-07	up	Gh_D10G1878	19.2611	8.09162	1.17951	2.65774e-39	0.0313976	0.0495695	up	Gh_A05G3844	100.537	48.9168	1.1757	3.63e-05	1.99e-09	4.3e-11	up
Gh_D12G2552	77.3577	33.3443	1.21986	2.21669e-40	3.22239e-07	2.78833e-07	up	Gh_D08G1309	37.2664	15.9697	1.16602	2.42671e-38	0.00136577	0.0017034	up	Gh_A02G0017	32.7781	15.6349	1.18375	9.92e-05	0.0026943	0.00073532	up
Gh_A05G0602	80.8058	35.3283	1.20883	2.28622e-40	1.84467e-07	1.57626e-07	up	Gh_D05G0637	29.5466	13.2931	1.15743	4.00605e-38	0.00500818	0.00703208	up	Gh_D08G1309	33.3143	15.9697	1.18375	9.92e-05	0.0026943	0.00073532	up
Gh_D09G1782	638.242	245.501	1.38475	1.69844e-41	4.36686e-18	8.61361e-28	up	Gh_D08G0380	29.9834	12.8357	1.15743	4.00605e-38	0.00500818	0.00703208	up	Gh_A11G0092	35.6974	17.4745	1.18	7.74e-06	0.00150851	0.000370218	up
Gh_D08G0875	279.887	108.92	1.3688	3.4748e-39	4.6299e-19	9.89445e-27	up	Gh_D11G2098	188.845	75.4056	1.31011	3.4796e-39	1.84342e-15	5.42236e-20	up	Gh_D02G0754	34.7773	16.581	1.18118	0.000144925	0.00183277	0.000467073	up
Gh_D06G2270	203.292	82.3921	1.31355	2.18317e-39	7.93996e-17	2.96253e-20	up	Gh_D11G3304	489.427	189.21	1.35183	1.59708e-38	1.05981e-18	1.24348e-39	up	Gh_D11G2014	34.8935	16.9588	1.18118	0.000144925	0.00183277	0.000467073	up
Gh_A03G0468	71.7149	31.3116	1.21244	2.07244e-40	9.6773e-07	9.16381e-07	up	Gh_D01G1588	163.766	65.5957	1.28894	7.31473e-39	7.3326e-14	5.65696e-17	up	Gh_D12G2626	35.1767	16.6915	1.18118	0.000144925	0.00183277	0.000467073	up
Gh_A09G2068	320.479	122.246	1.39947	9.04198e-39	2.29515e-19	4.41804e-29	up	Gh_D09G1813	28.2367	12.3376	1.17061	8.15472e-39	0.00658932	0.0093349	up	Gh_D02G0888	83.2077	39.9984	1.19247	2.02e-07	5.64e-08	2.17e-09	up
Gh_D11G0758	55.3464	24.4564	1.18948	1.72763e-40	3.67723e-05	4.35715e-05	up	Gh_A01G0186	45.3333	18.7748	1.204	7.28494e-39	0.000225897	0.00022671	up	Gh_D01G1428	27.8669	13.3154	1.19183	0.000215382	0.00701213	0.00231742	up
Gh_D11G2324	47.3981	21.3317	1.15335	1.51914e-40	0.000248425	0.000334589	up	Gh_A05G0534	73.8723	31.4326	1.22359	1.09843e-41	8.37731e-07	3.6811e-07	up	Gh_A01G0513	73.9234	35.4218	1.19907	1.41e-06	3.45e-07	1.84e-08	up
Gh_D11G2912	47.0713	21.0413	1.15335	1.51914e-40	0.000248425	0.000334589	up	Gh_D06G1946	61.6229	25.8203	1.21952	6.85035e-39	7.99625e-06	5.25004e-06	up	Gh_A11G2547	73.9369	35.3107	1.19907	1.41e-06	3.45e-07	1.84e-08	up
Gh_A08G0287	36.5447	17.3948	1.10928	2.86854e-42	0.00228462	0.00345919	up	Gh_A06G1047	50.1501	21.4192	1.21357	7.64227e-39	8.03944e-05	7.22207e-05	up	Gh_D01G0027	76.3949	36.1374	1.19746	1.32e-06	2.32e-07	1.15e-08	up
Gh_A07G1705	49.8113	22.0603	1.17612	3.78347e-42	0.000110529	0.000144084	up	Gh_A07G0202	587.484	220.454	1.39641	2.77955e-37	7.10638e-20	6.02727e-42	up	Gh_D02G0786	103.922	50.415	1.18159	1.55e-06	8.05e-10	1.49e-11	up
Gh_D09G1641	40.2691	17.8136	1.14015	1.31567e-40	0.00101465	0.00145638	up	Gh_A09G0145	43.3622	17.6663	1.2151	7.04523e-39	0.000293019	0.000298819	up	Gh_D08G1285	165.292	77.4482	1.22956	1.69e-06	2.12e-16	2.16e-19	up
Gh_A08G1619	24.3269	10.9003	1.10089	1.84681e-40	0.0213874	0.0339991	up	Gh_A05G1090	25.7626	11.0274	1.18594	8.24424e-39	0.0086587	0.0122447	up	Gh_D11G2689	22.5513	10.5023	1.20349	4.66e-08	0.0177898	0.00719631	up
Gh_A11G1122	24.0422	10.9576	1.10089	1.84681e-40	0.0213874	0.0339991	up	Gh_A11G1474	26.3498	10.8228	1.18594	8.24424e-39	0.0086587	0.0122447	up	Gh_A03G0428	115.074	54.846	1.20349	8.11e-10	3.97e-11	4e-13	up
Gh_D09G2035	23.9807	11.0939	1.10089	1.84681e-40	0.0213874	0.0339991	up	Gh_A13G1719	25.6004	10.7947	1.18594	8.24424e-39	0.0086587	0.0122447	up	Gh_D10G0430	38.5085	18.0174	1.19669	0.000211653	0.000766964	0.000164768	up
Gh_D10G0633	23.9998	11.2583	1.10089	1.84681e-40	0.0213874	0.0339991	up	Gh_D10G0633	26.425	11.2583	1.18594	8.24424e-39	0.0086587	0.0122447	up	Gh_D10G1626	27.2479	12.5979	1.19381	1.66e-05	0.0084829	0.00292444	up
Gh_D13G0480	24.1185	11.3354	1.10089	1.84681e-40	0.0213874	0.0339991	up	Gh_A10G1346	183.18	72.4224	1.32216	7.69142e-39	2.16627e-15	1.11321e-19	up	Gh_A03G0708	58.9501	28.1681	1.18911	1.22e-05	1.07e-05	1.05e-06	up
Gh_A02G1620	26.0732	12.4911	1.0938	4.92326e-40	0.0160959	0.0255512	up	Gh_D10G1801	90.033	36.7599	1.25281	2.32685e-38	2.44925e-08	5.42039e-09	up	Gh_A06G1218	95.8754	46.2186	1.18516	7.17e-07	4.09e-09	9.86e-11	up
Gh_A07G2094	26.2307	12.2039	1.0938	4.92326e-40	0.0160959	0.0255512	up	Gh_D09G1375	131.728	52.8734	1.29043	1.81696e-38	6.63731e-12	9.74633e-14	up	Gh_A12G2363	64.306	30.4163	1.20862	4.04e-09	2.63e-06	1.96e-07	up
Gh_D02G2079	27.9851	13.4389	1.08774	4.28568e-39	0.0120181	0.0190506	up	Gh_D10G0579	622.122	225.781	1.44116	5.47337e-38	4.0556e-21	2.9325e-44	up	Gh_A06G1594	22.0884	10.0277	1.20647	0.000744231	0.0214397	0.00904786	up
Gh_D12G0429	29.9206	13.7288	1.0825	2.6431e-39	0.00898892	0.014241	up	Gh_D06G1516	192.131	75.3688	1.3328	1.89508e-37	5.43374e-16	7.90392e-21	up	Gh_A07G0466	21.9934	10.3402	1.20647	0.000744231	0.0214397	0.00904786	up
Gh_D05G1561	79.5527	33.5136	1.23223	2.14839e-40	1.44496e-07	1.13876e-07	up	Gh_A04G1039	23.8139	9.91989	1.20397	1.47626e-38	0.0112768	0.0161156	up	Gh_D01G1880	22.3182	10.1367	1.20647	0.000744231	0.0214397	0.00904786	up
Gh_A13G0851	78.183	32.9623	1.23836	1.61287e-39	1.89028e-07	1.51997e-07	up	Gh_D09G1963	48.1614	19.7841	1.22398	2.26253e-39	0.000103649	9.53066e-05	up	Gh_A05G3297	24.3478	11.0381	1.20076	0.00031067	0.0148717	0.00571219	up
Gh_D10G2359	70.305	30.1369	1.21862	4.68884e-40	1.28669e-06	1.21489e-06	up	Gh_D11G1058	32.9149	13.8914	1.1897	2.38682e-38	0.00234828	0.00297558	up	Gh_D10G1316	45.0604	21.248	1.20495	2.35e-05	0.000174937	2.89e-05	up
Gh_D11G1883	62.1602	27.2446	1.19421	1.82344e-40	8.82694e-06	9.90413e-06	up	Gh_D02G0690	63.3438	25.889	1.24243	1.58103e-38	4.827e-06	2.78696e-06	up	Gh_D06G1180	83.8206	40.1922	1.19183	1.94e-07	4.58e-08	1.72e-09	up
Gh_A08G0380	60.0539	26.466	1.20072	4.21944e-40	1.18155e-05	1.32101e-05	up	Gh_D06G0583	297.301	112.066	1.38594	1.04606e-38	7.45182e-20	1.1597e-32	up	Gh_A03G0405	630.213	280.031	1.30638	2.15e-13	1.61e-57	4.1e-81	up
Gh_D02G0425	52.6149	22.5358	1.19664	1.61347e-40	4.93644e-05	5.82015e-05	up	Gh_D12G2589	340.718	125.549	1.41578	4.83254e-39	9.96258e-21	1.94656e-37	up	Gh_A11G0950	72.7428	34.1461	1.22066	8.08e-06	2.87e-07	1.44e-08	up
Gh_A02G1095	131.097	53.4013	1.30763	5.18816e-39	1.47822e-12	1.36692e-13	up	Gh_A10G1648	50.6591	20.933	1.24186	2.30117e-39	4.86105e-05	3.89524e-05	up	Gh_D08G0287	62.6112	29.812	1.20975	6.06e-05	3.2e-06	2.49e-07	up
Gh_D08G1733	44.8906	20.2388	1.16	2.60524e-39	0.000332574	0.000450838	up	Gh_A11G0911	51.2546	21.1837	1.24186	2.30117e-39	4.86105e-05	3.89524e-05	up	Gh_A01G0035	43.5914	20.9767	1.20647	2.92e-05	0.000211903	3.62e-05	up
Gh_D05G2037	43.4617	18.8953	1.16729	2.48318e-39	0.000449301	0.000603339	up	Gh_A11G2754	133.685	53.2543	1.31207	2.34143e-39	2.52801e-12	2.57436e-14	up	Gh_A13G1422	43.7436	20.5066	1.20647	2.92e-05	0.000211903	3.62e-05	up
Gh_D08G1566	41.407	18.0829	1.17534	1.76823e-39	0.000605538	0.000804091	up	Gh_A03G1631	314.108	115.798	1.41575	4.49279e-39	1.06398e-20	2.51725e-35	up	Gh_D09G0097	47.0878	22.2473	1.2021	4.01e-06	0.000117583	1.8e-05	up
Gh_D06G0402	75.1512	31.7144	1.22586	2.00898e-40	4.22865e-07	3.6809e-07	up	Gh_A12G2465	35.9959	14.6583	1.21722	2.26859e-38	0.00107763	0.00124209	up	Gh_A09G1197	87.7934	41.7261	1.20647	1.39e-05	1.37e-08	4.04e-10	up
Gh_A03G1551	32.7633	14.8433	1.12164	1.02868e-40	0.00412881	0.00621483	up	Gh_D01G1852	35.7253	15.4692	1.21722	2.26859e-38	0.00107763	0.00124209	up	Gh_D12G0809	42.0195	19.8612	1.20975	3.98e-05	0.000315609	5.79e-05	up
Gh_A10G2324	207.693	81.9172	1.34863	3.54435e-40	1.04501e-17	1.45389e-21	up	Gh_D07G0842	35.8003	15.1415	1.21722	2.26859e-38	0.00107763	0.00124209	up	Gh_D12G1478	60.0234	28.0743	1.21336	1.17e-05	5.87e-06	5.07e-07	up
Gh_D09G0853	273.159	104.364	1.39975	2.31516e-39	7.61447e-20	1.87578e-27	up	Gh_A01G1047	31.0852	13.0327	1.20398	1.31352e-38	0.00306354	0.00392372	up	Gh_A13G0995	137.963	64.2831	1.23666	1.58e-06	7.45e-14	2.23e-16	up
Gh_A07G0466	21.809	10.3402	1.10927	1.5406e-42	0.0284244	0.0451376	up	Gh_A10G0588	30.8033	12.9057	1.20398	1.31352e-38	0.00306354	0.00392372	up	Gh_A13G0554	41.5098	19.119	1.229	0.000233731	0.000286045	5.09e-05	up
Gh_A11G1237	22.304	10.3059	1.10927	1.5406e-42	0.0284244	0.0451376	up	Gh_A01G0116	21.8588	9.22191	1.2255	7.93381e-42	0.0145473	0.021177	up	Gh_D02G1199	172.718	80.0236	1.24307	3.4e-08	1.88e-17	1.17e-20	up
Gh_D07G2287	21.7958	10.12	1.10927	1.5406e-42	0.0284244	0.0451376	up	Gh_D07G0334	22.2818	9.05445	1.2255	7.93381e-42	0.0145473	0.021177	up	Gh_D11G2909	58.8948	27.9956	1.21465	2.45e-06	7.18e-06	6.42e-07	up
Gh_D08G1064	21.7329	9.98406	1.10927	1.5406e-42	0.0284244	0.0451376	up	Gh_D09G1275	16.9645	7.34879	1.20396	6.87323e-42	0.0412099	0.0646691	up	Gh_A05G3272	67.6258	31.7924	1.22682	1.06e-05	7.87e-07	4.69e-08	up
Gh_D10G2292	22.0356	9.51804	1.10927	1.5406e-42	0.0284244	0.0451376	up	Gh_D11G1977	17.1447	7.24247	1.20396	6.87323e-42	0.0412099	0.0646691	up	Gh_A03G0666	20.3558	9.2152	1.21336	0.000478738	0.0313336	0.0142138	up
Gh_D10G0498	60.8501	25.7597	1.22438	1.67608e-40	6.89186e-06	7.20367e-06	up	Gh_D13G0869	17.2875	6.59225	1.20396	6.87323e-42	0.0412099	0.0646691	up	Gh_A05G1215	19.6259	9.498	1.21336	0.000478738	0.0313336	0.0142138	up
Gh_A06G0474	186.224	73.4179	1.35415	7.63476e-40	7.15086e-17	8.1659e-20	up	Gh_D06G2371	86.7842	35.2471	1.28323	1.16617e-38	2.31783e-08	4.94269e-09	up	Gh_D01G0525	20.2824	9.32363	1.21336	0.000478738	0.0313336	0.0142138	up
Gh_A10G1188	220.827	86.0824	1.36774	4.95694e-39	1.68445e-18	4.07271e-23	up	Gh_A12G1027	1285.82	444.064	1.51518	1.40418e-37	9.46719e-24	5.78983e-41	up	Gh_D11G1036	19.5751	9.06433	1.21336	0.000478738	0.0313336	0.0142138	up
Gh_A01G0769	19.6364	8.94618	1.11936	1.35881e-40	0.0380867	0.0595549	up	Gh_A06G0361	43.9639	17.9314	1.24789	8.8658e-40	0.000175947	0.000162896	up	Gh_A11G1357	307.806	143.15	1.24121	4.02e-08	1.43e-30	1.1e-36	up
Gh_D08G1235	20.0716	8.62784	1.11936	1.35881e-40	0.0380867	0.0595549	up	Gh_A01G1576	236.47	91.2759	1.35275	8.69102e-39	5.04442e-18	7.98361e-26	up	Gh_D02G0075	68.5993	32.0067	1.22552	1.63e-06	6.43e-07	3.69e-08	up
Gh_D08G1604	20.2262	9.46187	1.11936	1.35881e-40	0.0380867	0.0595549	up	Gh_A10G2091	670.361	240.362	1.46175	1.70842e-38	9.85933e-22	6.33017e-45	up	Gh_A11G2046	31.7492	14.8484	1.23247	1.11e-05	0.00224053	0.000573956	up
Gh_D12G2202	19.5795	9.48885	1.11936	1.35881e-40	0.0380867	0.0595549	up	Gh_D05G1637	206.951	78.8994	1.36669	4.42528e-38	2.76557e-17	2.83349e-23	up	Gh_A01G0993	379.923	176.205	1.24562	2.38e-08	3.44e-37	1.61e-45	up
Gh_D04G0387	71.7642	29.7209	1.25898	1.83447e-40	4.34013e-07	3.48585e-07	up	Gh_A11G0282	19.9906	8.12524	1.25166	3.57715e-38	0.0189551	0.0275858	up	Gh_A05G3645	66.4431	30.5278	1.22956	2.83e-05	1.18e-06	7.47e-08	up
Gh_D13G0175	54.2275	22.6823	1.22336	1.51196e-40	2.90185e-05	3.1648e-05	up	Gh_A13G0662	19.6028	7.64453	1.25166	3.57715e-38	0.0189551	0.0275858	up	Gh_A05G0055	64.0681	29.7964	1.23247	5.83e-05	1.77e-06	1.2e-07	up
Gh_A03G0016	196.939	76.6847	1.36051	2.49926e-39	1.63091e-17	6.00708e-21	up	Gh_A02G0436	576.105	209.274	1.44305	4.89363e-41	3.86616e-21	1.04646e-44	up	Gh_A11G0589	756.505	343.873	1.27576	2.27e-13	8.41e-61	4.52e-94	up
Gh_D04G0517	131.081	52.4623	1.33485	1.46824e-39	6.77102e-13	4.81813e-14	up	Gh_D05G0654	51.6514	20.5188	1.26961	1.26209e-38	2.93864e-05	2.08691e-05	up	Gh_A13G1774	185.405	84.9724	1.26135	7.68e-07	4.81e-19	1.4e-22	up
Gh_D06G2239	79.7967	33.0229	1.27467	4.5745e-40	6.58136e-08	4.28134e-08	up	Gh_D13G2124	102.148	41.319	1.28629	1.32465e-41	1.2615e-09	1.30636e-10	up	Gh_A02G1267	19.4347	8.70957	1.21736	3.75e-05	0.0382307	0.017902	up
Gh_D12G2015	77.073	32.2319	1.26359	1.87542e-40	1.46719e-07	1.08564e-07	up	Gh_A09G2394	47.2786	18.6918	1.26607	8.74487e-40	8.0743e-05	6.6868e-05	up	Gh_A06G0122	19.0216	8.87591	1.21736	3.75e-05	0.0382307	0.017902	up
Gh_D05G0842	30.8823	14.1589	1.12904	9.11835e-41	0.00551692	0.00832698	up	Gh_D08G0312	47.4924	19.4508	1.26607	8.74487e-40	8.0743e-05	6.6868e-05	up	Gh_A08G1144	19.0329	8.94715	1.21736	3.75e-05	0.0382307	0.017902	up
Gh_D10G0255	31.2353	14.2758	1.12904	9.11835e-41	0.00551692	0.00832698	up	Gh_D03G0048	121.588	48.4683	1.31871	7.63817e-38	1.54014e-11	3.77196e-13	up	Gh_D07G2309	18.6173	8.54583	1.21736	3.75e-05	0.0382307	0.017902	up
Gh_A13G1111	46.4005	20.1588	1.19136	9.90017e-40	0.0001979	0.000253876	up	Gh_D12G2260	141.356	54.3382	1.3586	5.62575e-38	1.93459e-13	6.71692e-16	up	Gh_A05G3347	38.2085	17.8197	1.21736	0.000103515	0.000696865	0.000147103	up
Gh_A01G1898	29.2302	12.5907	1.1375	5.1448e-39	0.00731145	0.0110573	up	Gh_D13G0059	60.2908	23.94	1.28581	1.36416e-38	4.76849e-06	2.54397e-06	up	Gh_D12G1496	159.492	73.147	1.25257	5.55e-07	3.13e-16	3.25e-19	up
Gh_D06G0841	28.7929	13.1715	1.1375	5.1448e-39	0.00731145	0.0110573	up	Gh_A12G0668	17.6472	6.51758	1.28414	1.93409e-39	0.024898	0.0358108	up	Gh_A05G3794	32.7544	15.1823	1.22956	2.55e-05	0.00184742	0.000460132	up
Gh_D12G0456	29.2206	13.2044	1.1375	5.1448e-39	0.00731145	0.0110573	up	Gh_D02G2421	17.5731	7.27964	1.28414	1.93409e-39	0.024898	0.0358108	up	Gh_D10G0235	32.8683	15.4569	1.22956	2.55e-05	0.00184742	0.000460132	up
Gh_A07G0301	42.2427	18.1029	1.20969	6.68632e-40	0.000355273	0.000444257	up	Gh_D11G0293	17.6568	6.58164	1.28414	1.93409e-39	0.024898	0.0358108	up	Gh_D11G0927	35.5676	16.848	1.22182	0.000119031	0.00103568	0.000231306	up
Gh_A12G0432	41.6864	17.5728	1.20969	6.68632e-40	0.000355273	0.000444257	up	Gh_A08G0830	55.3939	22.458	1.2842	2.20459e-39	1.32676e-05	8.37786e-06	up	Gh_D07G0797	28.7994	13.446	1.24245	0.000192391	0.00400342	0.00114076	up
Gh_A05G0305	27.1426	11.6024	1.14724	4.41175e-40	0.00982711	0.0146137	up	Gh_D02G1542	25.3679	9.98028	1.26169	7.3311e-42	0.00675049	0.00885712	up	Gh_A06G0991	56.9251	26.1702	1.24433	1.59e-05	7.2e-06	6.25e-07	up
Gh_A11G0140	27.3729	12.3143	1.14724	4.41175e-40	0.00982711	0.0146137	up	Gh_D07G1399	25.3655	9.97238	1.26169	7.3311e-42	0.00675049	0.00885712	up	Gh_A02G1247	17.5821	8.36838	1.22182	0.000601239	0.046095	0.0222549	up
Gh_D01G2157	27.1813	11.6293	1.14724	4.41175e-40	0.00982711	0.0146137	up	Gh_A03G0468	77.8155	31.3116	1.29907	9.49716e-39	1.0284e-07	2.83132e-08	up	Gh_A11G2502	17.8978	8.26472	1.22182	0.000601239	0.046095	0.0222549	up
Gh_A12G1443	176.594	67.7254	1.38433	2.88415e-40	6.38155e-17	1.14087e-19	up	Gh_D06G0337	97.3675	37.632	1.32237	3.7e-39	1.42425e-09	1.51247e-10	up	Gh_D03G0772	18.2797	8.49431	1.22182	0.000601239	0.046095	0.0222549	up
Gh_D01G1852	33.9664	15.4692	1.16407	7.88982e-39	0.00248043	0.00351094	up	Gh_D09G1782	720.557	245.501	1.53198	1.59738e-38	8.8031e-24	1.43974e-48	up	Gh_D04G0629	26.8612	12.1611	1.25039	9.4e-05	0.0058393	0.00179639	up
Gh_D02G1993	165.45	62.8995	1.39254	2.76197e-40	2.63909e-16	1.16623e-18	up	Gh_D02G2018	61.263	23.894	1.30946	7.52152e-42	2.82133e-06	1.33687e-06	up	Gh_A13G1623	111.588	51.5349	1.24628	4.81e-07	2.18e-11	1.81e-13	up
Gh_A05G1554	420.232	156.932	1.42872	1.11559e-39	6.00989e-19	7.5581e-31	up	Gh_D11G1009	332.243	118.072	1.47156	9.79564e-39	3.7293e-22	3.80372e-39	up	Gh_D01G1544	138.849	63.819	1.2583	1.8e-06	2.64e-14	6.28e-17	up
Gh_D13G2076	32.0244	13.7714	1.17413	3.47693e-39	0.00331696	0.00468992	up	Gh_D13G0688	112.475	44.4783	1.31997	1.76167e-39	8.87937e-11	4.16799e-12	up	Gh_A10G1841	42.4891	19.1774	1.24628	1.07e-05	0.000212555	3.54e-05	up
Gh_A11G3089	86.2301	34.7727	1.29475	7.53508e-39	1.31549e-08	6.77276e-09	up	Gh_D11G1131	136.506	51.5864	1.37115	1.54265e-38	2.52655e-13	1.10899e-15	up	Gh_A04G0378	48.0416	22.1457	1.23247	3.75e-06	6.52e-05	8.66e-06	up
Gh_D11G0978	84.3197	33.652	1.30221	2.58643e-39	1.71783e-08	8.93513e-09	up	Gh_D11G3464	30.3366	11.5029	1.26846	1.244e-37	0.00239255	0.0028052	up	Gh_A12G2364	349.12	162.635	1.23766	3.49e-07	3.71e-34	2.15e-41	up
Gh_D08G0048	71.1941	29.2676	1.28704	3.10002e-39	3.34973e-07	2.46811e-07	up	Gh_D08G1868	51.3886	20.3548	1.31057	2.01903e-39	2.23364e-05	1.43879e-05	up	Gh_D11G0925	25.846	11.935	1.25484	0.000104656	0.00703449	0.00226154	up
Gh_A02G0069	39.3762	16.6621	1.18425	7.83125e-40	0.000810316	0.0010791	up	Gh_D10G1605	123.153	47.1932	1.36051	8.06669e-38	4.14334e-12	6.37994e-14	up	Gh_D04G2001	63.5052	29.3391	1.2454	3.23e-05	1.6e-06	1.05e-07	up
Gh_D01G2058	294.058	108.4	1.45245	2.81969e-39	5.04108e-21	3.26054e-30	up	Gh_A03G1584	22.6635	9.06437	1.28824	1.23461e-38	0.00878928	0.0114997	up	Gh_D05G3738	39.9292	18.0037	1.25184	3.04e-05	0.000316182	5.62e-05	up
Gh_A04G0748	45.1625	19.105	1.23215	6.56842e-40	0.000155837	0.000186192	up	Gh_A05G3820	22.696	9.09379	1.28824	1.23461e-38	0.00878928	0.0114997	up	Gh_A01G1105	75.9025	34.5262	1.25801	7.83e-06	6.97e-08	2.54e-09	up
Gh_A13G1726	340.126	122.545	1.47519	9.4682e-40	5.12004e-21	2.67253e-32	up	Gh_A12G0342	22.7989	9.01076	1.28824	1.23461e-38	0.00878928	0.0114997	up	Gh_A08G0924	171.254	76.8562	1.29042	1.08e-06	3.52e-18	1.35e-21	up
Gh_A09G1634	156.019	58.9148	1.40564	6.02143e-40	7.30287e-16	5.45842e-18	up	Gh_A03G1178	45.7018	17.7392	1.31132	1.09218e-38	6.19264e-05	4.60817e-05	up	Gh_A03G1723	73.3495	33.0239	1.2631	7.85e-06	1.28e-07	5.19e-09	up
Gh_A07G0885	43.0841	18.289	1.24324	8.25324e-40	0.000208481	0.000245666	up	Gh_A12G0193	142.448	52.7774	1.3955	2.81149e-38	5.28334e-14	1.06973e-16	up	Gh_D08G2651	23.8418	10.6369	1.26489	4.06e-08	0.0102548	0.00354223	up
Gh_D08G0665	43.2169	17.8579	1.24324	8.25324e-40	0.000208481	0.000245666	up	Gh_A09G0855	138.588	51.8425	1.392	4.73586e-39	9.72234e-14	2.76105e-16	up	Gh_A07G1544	248.547	111.931	1.28909	1.64e-05	3.04e-26	2.49e-31	up
Gh_D01G1467	103.604	41.3128	1.34228	4.71527e-42	1.05162e-10	2.42668e-11	up	Gh_A07G0297	106.008	41.1973	1.34155	2.16825e-38	1.6267e-10	9.36704e-12	up	Gh_A09G1502	83.7757	38.9252	1.24628	9.96e-07	1.38e-08	3.83e-10	up
Gh_D07G2116	65.9956	26.8653	1.28372	3.5875e-40	1.02691e-06	8.17845e-07	up	Gh_A10G1627	71.5965	28.3868	1.32872	8.33645e-42	2.1344e-07	6.33294e-08	up	Gh_A10G0249	77.4869	35.3385	1.2564	1.21e-06	5.71e-08	2.01e-09	up
Gh_A07G1710	22.8484	9.99913	1.17201	4.46567e-40	0.0174453	0.0259027	up	Gh_A01G1685	207.19	75.5537	1.42222	1.07155e-37	2.26199e-18	9.02158e-25	up	Gh_A10G1608	93.1936	42.8748	1.25225	4.8e-06	1.52e-09	2.78e-11	up
Gh_A08G2471	23.1921	9.70452	1.17201	4.46567e-40	0.0174453	0.0259027	up	Gh_A06G1663	37.7971	15.382	1.29419	1.07818e-38	0.000384837	0.000360663	up	Gh_A11G2307	252.939	113.039	1.29579	3.48e-07	6.78e-27	3.83e-32	up
Gh_A12G1895	23.263	10.0937	1.17201	4.46567e-40	0.0174453	0.0259027	up	Gh_D11G0441	158.649	59.3665	1.40487	8.51071e-38	2.48014e-15	7.01931e-19	up	Gh_A10G0081	24.5617	11.299	1.25966	0.000272711	0.00851016	0.00285446	up
Gh_D12G2555	23.3444	9.86185	1.17201	4.46567e-40	0.0174453	0.0259027	up	Gh_A01G2116	56.9931	21.6946	1.33528	2.08195e-39	4.65309e-06	2.25125e-06	up	Gh_A02G1506	87.2421	39.858	1.26038	1.71e-07	5.05e-09	1.13e-10	up
Gh_D13G2357	22.8227	10.247	1.17201	4.46567e-40	0.0174453	0.0259027	up	Gh_A07G0841	69.9654	27.244	1.33988	2.4718e-39	2.73347e-07	8.30728e-08	up	Gh_A05G2944	22.6862	10.4205	1.27061	0.000646723	0.0123283	0.00445717	up
Gh_A05G0388	29.8704	13.1617	1.18559	7.63499e-41	0.00444634	0.00623757	up	Gh_A07G0981	21.0807	8.11615	1.32038	1.92123e-39	0.0114021	0.0148215	up	Gh_D02G0507	138.433	62.2139	1.2821	4.52e-10	1.42e-14	2.78e-17	up
Gh_A12G1619	53.9977	21.7934	1.2861	9.79538e-40	1.28225e-05	1.19205e-05	up	Gh_D01G0249	20.8325	8.19555	1.32038	1.92123e-39	0.0114021	0.0148215	up	Gh_A11G3074	59.1009	26.5343	1.26712	1.19e-05	3.2e-06	2.33e-07	up
Gh_D06G0784	54.2147	22.2147	1.2861	9.79538e-40	1.28225e-05	1.19205e-05	up	Gh_D07G0358	21.1286	7.63758	1.32038	1.92123e-39	0.0114021	0.0148215	up	Gh_A12G1326	38.2026	17.1054	1.25801	6.38e-06	0.000466971	8.9e-05	up
Gh_D12G1222	986.721	351.763	1.49761	6.59461e-40	3.64646e-21	6.37784e-30	up	Gh_A02G1299	51.8099	19.7913	1.33832	1.11079e-38	1.30038e-05	7.43773e-06	up	Gh_A12G1530	46.4121	20.9988	1.27061	2.54e-05	6.5e-05	8.32e-06	up
Gh_A05G1841	75.2228	29.9927	1.31749	1.5942e-40	8.71582e-08	5.19065e-08	up	Gh_D12G0097	122.56	46.0537	1.39121	7.53294e-38	1.7723e-12	2.0549e-14	up	Gh_D13G0576	45.7601	20.6546	1.27061	2.54e-05	6.5e-05	8.32e-06	up
Gh_A08G2531	58.9185	23.5276	1.28989	1.35844e-40	4.10236e-06	3.61298e-06	up	Gh_A10G0455	35.9081	14.3465	1.31344	2.00205e-38	0.000496945	0.000467277	up	Gh_D11G0725	46.7698	21.2061	1.26768	2.02e-05	5.31e-05	6.59e-06	up
Gh_D08G1343	20.8379	8.93083	1.18808	1.20091e-42	0.0231695	0.0342357	up	Gh_D02G1615	36.2347	14.385	1.31344	2.00205e-38	0.000496945	0.000467277	up	Gh_A01G2122	99.1333	45.0456	1.26092	1.91e-05	2.96e-10	4.02e-12	up
Gh_D13G0774	21.2249	8.61277	1.18808	1.20091e-42	0.0231695	0.0342357	up	Gh_D11G0733	35.7865	13.5037	1.31344	2.00205e-38	0.000496945	0.000467277	up	Gh_D01G1044	680.439	289.505	1.36846	5.64e-08	1.11e-64	8.46e-94	up
Gh_A06G0969	28.4261	11.9534	1.19877	5.31284e-40	0.00592274	0.00832395	up	Gh_D02G0888	105.06	39.9984	1.36313	8.67799e-38	1.16491e-10	6.09894e-12	up	Gh_D12G1571	77.8493	35.3853	1.27502	1.17e-06	3.08e-08	9.47e-10	up
Gh_D07G2242	28.3083	12.1427	1.19877	5.31284e-40	0.00592274	0.00832395	up	Gh_A10G2090	195.27	71.2197	1.43371	6.10812e-39	5.46504e-18	1.04783e-23	up	Gh_D06G1080	33.9831	15.3853	1.27263	2.32e-05	0.00103449	0.000222608	up
Gh_D02G0453	94.9369	37.1975	1.35852	4.29619e-40	5.01799e-10	1.42173e-10	up	Gh_D10G0162	112.916	42.8645	1.36554	1.20384e-38	2.32461e-11	7.17243e-13	up	Gh_A10G0416	35.9788	16.2329	1.26489	7.26e-06	0.000696865	0.000142082	up
Gh_D01G2086	34.9336	15.2219	1.2053	6.55652e-40	0.00146407	0.00193346	up	Gh_A10G2089	311.574	109.125	1.49603	3.56044e-39	1.11558e-22	2.05041e-38	up	Gh_A10G0594	90.2639	40.7359	1.27366	2.49e-05	1.85e-09	3.34e-11	up
Gh_D08G2071	77.5834	31.3191	1.32717	1.22494e-39	3.81648e-08	2.03433e-08	up	Gh_D06G0094	63.0438	23.6728	1.35564	1.25017e-38	9.83428e-07	3.52834e-07	up	Gh_D13G2123	72.8634	32.9423	1.28479	2.19e-05	8.44e-08	3.04e-09	up
Gh_D06G1721	220.106	80.8626	1.44713	6.92104e-40	3.86264e-20	2.78229e-25	up	Gh_D06G0963	25.9579	9.91527	1.31718	6.59025e-42	0.00401966	0.00469734	up	Gh_A09G0573	42.0079	18.673	1.28375	8.51e-05	0.000143314	2.12e-05	up
Gh_D05G0356	102.668	40.3397	1.3636	1.86267e-40	7.90099e-11	1.61731e-11	up	Gh_A02G0838	199.074	71.8005	1.44293	3.51744e-38	2.26199e-18	2.06294e-24	up	Gh_A13G1167	140.107	62.6994	1.29136	2.84e-07	6.27e-15	1.04e-17	up
Gh_D05G1946	25.74	10.9088	1.2141	1.48674e-40	0.00787755	0.0109874	up	Gh_D07G0886	158.779	57.597	1.42933	1.22266e-37	1.04737e-15	2.14268e-19	up	Gh_A11G0132	43.8536	19.9948	1.27686	2.81e-05	9.68e-05	1.33e-05	up
Gh_A03G0652	18.6248	7.52274	1.20768	3.298e-40	0.0305018	0.0451626	up	Gh_D07G1956	66.1257	25.4311	1.36453	9.30282e-40	4.41122e-07	1.38925e-07	up	Gh_A12G1909	30.3384	13.331	1.29136	0.000173217	0.00222799	0.00054983	up
Gh_D05G2160	18.8903	7.50458	1.20768	3.298e-40	0.0305018	0.0451626	up	Gh_A03G1709	16.3294	5.68313	1.32553	1.47639e-39	0.0319444	0.0461588	up	Gh_D11G2787	218.375	96.8118	1.30762	1.57e-06	1.51e-23	4.47e-28	up
Gh_D06G0263	18.6721	7.75032	1.20768	3.298e-40	0.0305018	0.0451626	up	Gh_A05G3108	15.6872	6.26755	1.32553	1.47639e-39	0.0319444	0.0461588	up	Gh_D03G0680	22.1069	9.96282	1.27686	2.53e-05	0.0148717	0.00557588	up
Gh_D09G1593	18.532	8.1568	1.20768	3.298e-40	0.0305018	0.0451626	up	Gh_A11G1658	15.8578	6.45114	1.32553	1.47639e-39	0.0319444	0.0461588	up	Gh_D12G2089	22.0009	9.94714	1.27686	2.53e-05	0.0148717	0.00557588	up
Gh_D11G3247	18.8296	7.62923	1.20768	3.298e-40	0.0305018	0.0451626	up	Gh_D03G0209	16.2716	5.95538	1.32553	1.47639e-39	0.0319444	0.0461588	up	Gh_A03G1599	59.4829	26.3803	1.29408	1.41e-05	2.12e-06	1.37e-07	up
Gh_D12G2172	38.3143	16.2607	1.23214	1.24016e-39	0.000642714	0.000785433	up	Gh_D05G0508	15.72	6.17662	1.32553	1.47639e-39	0.0319444	0.0461588	up	Gh_D02G0690	57.5674	25.889	1.2969	1.23e-05	2.6e-06	1.74e-07	up
Gh_D05G0533	419.293	148.824	1.50059	3.10745e-39	9.38663e-21	9.81834e-34	up	Gh_D07G1595	15.5985	5.63136	1.32553	1.47639e-39	0.0319444	0.0461588	up	Gh_A12G2016	334.107	149.833	1.2942	1.45e-11	5.51e-35	2.37e-42	up
Gh_A07G0744	70.4174	28.2789	1.31647	1.10897e-39	2.56406e-07	1.70496e-07	up	Gh_D11G1301	76.857	29.0947	1.3752	2.51955e-39	3.25076e-08	6.33627e-09	up	Gh_D13G1017	29.401	12.6142	1.2969	1.33e-05	0.0026955	0.000688618	up
Gh_A11G3305	149.411	55.0394	1.43994	3.1331e-39	7.70053e-16	6.59521e-18	up	Gh_D10G2361	1633.33	513.102	1.65144	6.8895e-41	1.92176e-28	6.03464e-46	up	Gh_D08G2533	437.271	189.001	1.34469	4.81e-08	1.06e-46	1.07e-58	up
Gh_A03G1300	23.9832	10.0158	1.23213	1.32046e-40	0.0104968	0.0143678	up	Gh_A13G1247	29.4352	10.9927	1.34066	8.14858e-40	0.00183558	0.00192274	up	Gh_D04G1200	222.675	97.5511	1.32554	9.12e-11	1.56e-24	2.67e-29	up
Gh_A05G2646	178.503	65.5579	1.44327	1.89864e-39	4.36686e-18	3.10334e-21	up	Gh_D05G1122	29.046	11.2129	1.34066	8.14858e-40	0.00183558	0.00192274	up	Gh_A10G0948	66.2339	29.2835	1.30111	1.73e-06	3.43e-07	1.59e-08	up
Gh_D02G0983	35.6188	15.0874	1.24537	1.15461e-39	0.000856636	0.00104721	up	Gh_A12G1838	376.99	127.423	1.54915	1.43613e-37	3.28916e-24	4.57515e-46	up	Gh_D12G1704	233.467	101.768	1.33111	7.75e-11	9.39e-26	8.27e-31	up
Gh_D13G1403	78.9029	30.7901	1.34544	1.53843e-40	2.21816e-08	1.05122e-08	up	Gh_A08G0301	36.5902	13.8048	1.35243	1.88157e-38	0.000292609	0.000244963	up	Gh_D10G2305	51.4832	22.9269	1.28822	2.06e-05	1.59e-05	1.53e-06	up
Gh_A05G3393	84.5495	32.9256	1.36163	1.60579e-40	4.33732e-09	1.58892e-09	up	Gh_D12G1633	58.6343	22.1853	1.38462	1.11192e-38	1.59974e-06	5.84274e-07	up	Gh_A11G0370	20.1134	8.96704	1.29136	3.2e-05	0.0214077	0.0087384	up
Gh_A09G0836	110.296	41.9883	1.38852	2.60622e-39	9.73592e-12	1.24677e-12	up	Gh_A07G0058	472.509	162.49	1.52591	6.00525e-38	2.24378e-23	5.20108e-49	up	Gh_A09G1400	224.309	97.6153	1.332	9.03e-11	8.32e-25	1.2e-29	up
Gh_A13G1932	41.3286	16.558	1.25551	6.99046e-40	0.000279061	0.000320551	up	Gh_A07G0308	195.583	69.2984	1.48203	5.52891e-39	6.37711e-19	4.7283e-25	up	Gh_A08G0263	26.8382	11.5478	1.30929	7.48e-05	0.00397403	0.0010812	up
Gh_A01G1576	253.901	91.2759	1.48743	7.08565e-40	7.23694e-22	3.06153e-29	up	Gh_A13G1111	53.632	20.1588	1.39227	1.02861e-38	4.47569e-06	1.91631e-06	up	Gh_A06G0174	40.2391	17.8157	1.29136	8.83e-05	0.000211144	3.37e-05	up
Gh_D07G2304	58.07	22.8708	1.32555	2.90832e-42	3.16266e-06	2.46549e-06	up	Gh_A01G1225	121.351	43.6	1.43107	1.15115e-41	8.95592e-13	8.05968e-15	up	Gh_D13G2216	40.1353	17.5104	1.29136	8.83e-05	0.000211144	3.37e-05	up
Gh_D07G2484	1606.59	545.344	1.57035	7.64168e-40	7.19067e-24	7.85195e-30	up	Gh_D06G0001	35.0681	12.5155	1.37645	1.77552e-39	0.00037799	0.000312385	up	Gh_D13G1808	25.3386	10.9536	1.32379	3.59e-08	0.00577048	0.00171023	up
Gh_D08G0751	65.6477	26.3073	1.33716	3.12373e-42	4.42909e-07	2.92534e-07	up	Gh_D11G1844	31.8823	12.3738	1.3601	5.78923e-39	0.000829113	0.000782321	up	Gh_A13G2279	32.9424	14.2942	1.32577	0.000137147	0.000834951	0.000165895	up
Gh_A06G1217	81.515	31.9987	1.3538	8.70769e-40	9.75874e-09	4.13642e-09	up	Gh_A13G1380	27.2951	10.4814	1.37062	5.97551e-42	0.00237472	0.00246734	up	Gh_D04G0335	79.1064	34.9217	1.31386	6.82e-06	1.1e-08	2.56e-10	up
Gh_A03G0309	31.1387	12.9014	1.23213	6.9782e-41	0.00264223	0.00343144	up	Gh_D01G0291	21.5326	7.60141	1.38597	5.31794e-39	0.00669789	0.00774794	up	Gh_D10G1767	18.7491	8.27899	1.29983	0.000510248	0.0260553	0.0108496	up
Gh_D03G1518	67.2134	26.0427	1.35869	9.90816e-40	2.56406e-07	1.52639e-07	up	Gh_D05G2709	21.6897	7.56937	1.38597	5.31794e-39	0.00669789	0.00774794	up	Gh_D11G2289	18.9894	8.14427	1.29983	0.000510248	0.0260553	0.0108496	up
Gh_D07G0468	45.3888	18.3075	1.3081	7.18422e-40	7.10087e-05	6.96179e-05	up	Gh_A11G2919	79.4376	28.829	1.41197	2.38367e-39	1.0878e-08	1.57109e-09	up	Gh_D01G0157	36.6202	16.2937	1.30442	6.68e-06	0.000380695	6.73e-05	up
Gh_D10G0303	91.7728	35.352	1.39153	3.70509e-42	4.81288e-10	1.22021e-10	up	Gh_D03G1822	162.59	57.1533	1.48999	4.53412e-39	6.76574e-17	3.90683e-21	up	Gh_D05G3737	173.69	75.4017	1.3439	1.01e-06	1.5e-19	2.5e-23	up
Gh_D12G0301	28.532	12.0514	1.24853	3.87215e-39	0.00353082	0.00457233	up	Gh_A05G1492	42.9819	15.9845	1.38016	2.59562e-38	6.08527e-05	3.97143e-05	up	Gh_A09G0100	37.9966	16.6595	1.29983	9.88e-05	0.000313832	5.33e-05	up
Gh_D04G1784	122.474	45.2696	1.43894	1.40182e-39	1.9329e-13	9.32606e-15	up	Gh_D05G2200	85.5981	31.3086	1.43912	7.95574e-42	1.32008e-09	1.14111e-10	up	Gh_A02G0699	723.751	299.667	1.40996	1.95e-13	5.3e-70	2.42e-104	up
Gh_D06G0343	109.8	41.4682	1.42287	4.09058e-40	3.99127e-12	4.02543e-13	up	Gh_A01G1088	75.2983	27.2746	1.43876	1.24349e-38	1.71974e-08	2.55933e-09	up	Gh_A06G1312	42.6643	18.5069	1.3177	7.16e-05	7.77e-05	9.87e-06	up
Gh_D12G0921	48.4587	18.7123	1.32427	2.30893e-40	3.09823e-05	2.73698e-05	up	Gh_A01G2122	127.112	45.0456	1.4686	1.10464e-38	9.72234e-14	3.58063e-16	up	Gh_A09G0107	25.5502	11.4593	1.31624	0.000260785	0.00476977	0.00136243	up
Gh_A02G1212	36.5288	14.8523	1.28437	1.79697e-42	0.000501328	0.000556587	up	Gh_D03G1462	25.4653	8.88691	1.40608	5.51043e-42	0.00306085	0.00314586	up	Gh_D13G1517	26.3828	11.4457	1.31624	0.000260785	0.00476977	0.00136243	up
Gh_A12G1395	37.1434	14.7846	1.28437	1.79697e-42	0.000501328	0.000556587	up	Gh_A03G0228	20.3044	7.17866	1.43224	2.2192e-38	0.00866638	0.00986524	up	Gh_D04G1081	358.836	158.674	1.31426	4.91e-09	3.35e-38	1.37e-46	up
Gh_D01G1934	37.0324	15.2544	1.28437	1.79697e-42	0.000501328	0.000556587	up	Gh_A08G0957	19.9715	7.17062	1.43224	2.2192e-38	0.00866638	0.00986524	up	Gh_D06G0957	35.4187	15.0894	1.31445	3.04e-05	0.000561505	0.000105669	up
Gh_A10G0588	32.1121	12.9057	1.27722	5.1133e-40	0.00153509	0.0018384	up	Gh_A07G1238	17.4707	6.30916	1.41042	1.20697e-39	0.0188474	0.024191	up	Gh_A12G2229	29.5336	12.829	1.32156	0.000285826	0.00200808	0.000477116	up
Gh_D09G1946	32.1062	13.4912	1.27722	5.1133e-40	0.00153509	0.0018384	up	Gh_D05G1321	33.1216	12.2536	1.40382	5.65998e-38	0.000486896	0.00039932	up	Gh_D02G1005	102.25	44.8836	1.31993	1.09e-09	3.12e-11	2.3e-13	up
Gh_D11G0738	27.1083	10.5726	1.26754	4.34993e-40	0.00468259	0.00598141	up	Gh_D13G1970	32.6034	11.656	1.40382	5.65998e-38	0.000486896	0.00039932	up	Gh_D13G1874	131.91	57.1876	1.33826	1.96e-06	8.73e-15	1.3e-17	up
Gh_D11G2309	27.1575	10.7842	1.26754	4.34993e-40	0.00468259	0.00598141	up	Gh_A02G0645	44.2315	15.8268	1.41295	6.52906e-40	3.56126e-05	2.03141e-05	up	Gh_D08G1218	72.0723	31.1946	1.33201	7.19e-06	4.45e-08	1.31e-09	up
Gh_A07G1950	51.2871	20.2447	1.33871	7.67197e-40	1.30485e-05	1.07997e-05	up	Gh_A09G1257	28.2086	9.84866	1.42215	5.37992e-39	0.00137805	0.00126046	up	Gh_A02G0744	211.716	92.4748	1.33589	9.71e-08	1.38e-23	3.52e-28	up
Gh_A03G0035	21.7507	8.97587	1.25366	4.6019e-41	0.0139685	0.0189672	up	Gh_D10G1882	39.0558	14.3052	1.4274	5.03019e-39	9.91673e-05	6.46164e-05	up	Gh_A04G0807	56.7535	24.9604	1.32839	1.25e-05	2.08e-06	1.28e-07	up
Gh_A07G1189	21.9459	8.85813	1.25366	4.6019e-41	0.0139685	0.0189672	up	Gh_A03G0652	22.5855	7.52274	1.4487	4.7885e-42	0.00391581	0.00394995	up	Gh_D04G0190	57.1695	24.6841	1.32839	1.25e-05	2.08e-06	1.28e-07	up
Gh_A09G0041	21.8977	8.82486	1.25366	4.6019e-41	0.0139685	0.0189672	up	Gh_A06G0830	31.3674	10.8599	1.4353	5.24585e-39	0.000622941	0.000505811	up	Gh_D02G0504	31.2662	13.1991	1.33867	0.000157039	0.00122637	0.000261677	up
Gh_A08G1363	64.7149	24.9759	1.37079	2.88805e-40	3.36512e-07	1.96227e-07	up	Gh_A05G2440	36.5262	12.9088	1.45553	1.67117e-38	0.000128427	8.17415e-05	up	Gh_A04G0629	840.117	347.723	1.41007	3.78e-13	5.66e-74	4.25e-121	up
Gh_A07G1868	83.8907	32.3434	1.38837	2.34001e-39	3.18174e-09	1.06149e-09	up	Gh_D11G2249	25.692	9.42671	1.46157	4.93134e-39	0.00177431	0.00158872	up	Gh_A11G1975	17.6063	7.79949	1.30929	3.99e-05	0.0311792	0.0136203	up
Gh_D06G2371	94.3182	35.2471	1.4224	1.14373e-39	1.55719e-10	3.00537e-11	up	Gh_A04G1096	47.8262	16.6284	1.45225	6.17379e-40	9.17138e-06	3.93087e-06	up	Gh_D04G0052	294.583	124.199	1.38391	8.81e-09	3.92e-34	2.7e-41	up
Gh_A03G0663	24.8507	9.98899	1.28985	9.4343e-40	0.00617268	0.00789074	up	Gh_D02G1254	1975.54	554.684	1.81298	1.82599e-38	1.82114e-34	4.91209e-53	up	Gh_D01G2172	449.156	188.804	1.38757	3.44e-07	6.96e-50	3.71e-63	up
Gh_A09G0855	146.325	51.8425	1.49084	4.51745e-40	2.46684e-16	1.50526e-18	up	Gh_D05G1123	21.2582	7.38789	1.50095	1.21159e-39	0.00498819	0.00490358	up	Gh_D09G1513	70.4657	30.0025	1.33791	2.98e-09	6.67e-08	2.08e-09	up
Gh_D11G0757	19.9673	8.37814	1.27983	9.21185e-41	0.0183512	0.0249056	up	Gh_D06G1434	21.1981	6.72504	1.50095	1.21159e-39	0.00498819	0.00490358	up	Gh_D11G2847	48.1513	20.8601	1.33201	2.2e-05	1.9e-05	1.8e-06	up
Gh_D13G0396	65.7576	24.7006	1.39265	1.16179e-40	1.92813e-07	1.02429e-07	up	Gh_A06G1641	48.688	17.0991	1.4817	4.55986e-39	5.31404e-06	1.93615e-06	up	Gh_A06G0661	28.7634	12.2412	1.35349	7.58e-05	0.00180302	0.000408794	up
Gh_A09G1104	51.8639	19.6367	1.36646	1.32761e-39	7.412e-06	5.56824e-06	up	Gh_A11G0455	93.6368	32.3842	1.5217	7.11933e-39	3.9122e-11	1.16768e-12	up	Gh_D03G1452	39.5629	17.17	1.33201	5.47e-06	0.000140658	1.97e-05	up
Gh_D13G1695	46.6396	17.503	1.37016	6.54985e-40	2.35163e-05	1.83739e-05	up	Gh_A05G0390	307.639	96.7818	1.64504	1.8738e-38	2.31103e-26	4.03385e-44	up	Gh_A05G3807	65.0413	27.6345	1.35437	1.86e-06	1.8e-07	6.68e-09	up
Gh_A01G0290	29.703	12.068	1.29662	5.8114e-41	0.00205497	0.00241935	up	Gh_A10G2355	31.5106	10.9948	1.48039	1.54957e-39	0.000361793	0.0002536	up	Gh_A09G1976	30.4471	12.9091	1.34581	1.2e-05	0.00148756	0.000326109	up
Gh_D02G0080	30.446	12.4324	1.29662	5.8114e-41	0.00205497	0.00241935	up	Gh_A08G1434	37.9686	13.0956	1.4935	8.57271e-39	7.36678e-05	4.01027e-05	up	Gh_A07G1752	47.1498	20.3434	1.3364	1.94e-05	2.32e-05	2.26e-06	up
Gh_A04G1182	38.3354	15.192	1.32234	4.06407e-40	0.000287272	0.000295864	up	Gh_A01G1605	24.493	7.81685	1.50882	7.67023e-39	0.00227228	0.00198004	up	Gh_A05G0854	93.7908	40.7643	1.3364	2.11e-05	1.51e-10	1.5e-12	up
Gh_D06G0520	86.4471	31.7361	1.42213	1.33723e-40	1.02251e-09	2.66293e-10	up	Gh_D09G0057	24.2391	7.75762	1.50882	7.67023e-39	0.00227228	0.00198004	up	Gh_A02G0179	15.9121	6.78441	1.33201	0.000276934	0.0456736	0.0211743	up
Gh_A10G1196	40.7394	16.1934	1.34039	7.405e-41	0.000124781	0.00012055	up	Gh_A04G0629	1190.63	347.723	1.75584	4.24857e-41	3.13987e-31	1.70465e-56	up	Gh_A11G0923	16.0889	6.69617	1.33201	0.000276934	0.0456736	0.0211743	up
Gh_A03G1992	35.6264	14.0659	1.34159	6.52027e-41	0.000382753	0.00038362	up	Gh_D10G1617	81.3135	27.1359	1.54912	6.08037e-42	6.03863e-10	3.18838e-11	up	Gh_A12G1414	15.6406	6.64523	1.33201	0.000276934	0.0456736	0.0211743	up
Gh_A08G1647	36.2516	14.035	1.34159	6.52027e-41	0.000382753	0.00038362	up	Gh_A02G0744	294.189	92.4748	1.65396	5.87541e-38	2.39935e-26	7.85609e-43	up	Gh_D05G1187	15.7188	6.75835	1.33201	0.000276934	0.0456736	0.0211743	up
Gh_A07G0355	62.3249	23.0683	1.42098	7.92111e-40	3.32723e-07	1.66899e-07	up	Gh_A12G2430	251.04	77.8971	1.66283	1.55715e-38	2.94712e-25	1.18583e-37	up	Gh_D12G2589	299.595	125.549	1.39087	8.38e-09	6.28e-35	2.64e-42	up
Gh_A08G1439	62.1071	23.0969	1.42098	7.92111e-40	3.32723e-07	1.66899e-07	up	Gh_D09G0876	198.849	62.5263	1.63423	2.34454e-38	6.7849e-22	1.68309e-29	up	Gh_D11G2913	59.0244	25.4353	1.34958	1.37e-05	9.1e-07	4.68e-08	up
Gh_A03G0281	73.3119	27.0447	1.42813	2.74601e-40	2.12834e-08	7.62941e-09	up	Gh_D04G1090	1378.58	392.897	1.79189	1.37653e-38	1.01489e-32	1.11585e-56	up	Gh_A10G0352	27.913	11.6638	1.36175	6.72e-05	0.00218064	0.000510624	up
Gh_D11G2372	49.826	19.2601	1.38257	1.61461e-39	9.86694e-06	7.22516e-06	up	Gh_D08G1146	475.59	146.346	1.68478	7.61742e-39	8.52645e-28	3.58736e-58	up	Gh_D04G0734	27.6287	11.6608	1.36175	6.72e-05	0.00218064	0.000510624	up
Gh_A13G2107	262.399	88.3257	1.5803	3.39769e-39	3.32299e-24	6.93277e-33	up	Gh_D06G1912	140.222	45.3519	1.6088	3.11536e-38	1.24608e-16	1.99189e-20	up	Gh_A05G2958	38.9904	16.5942	1.3373	9.16e-05	0.000171243	2.49e-05	up
Gh_D09G0462	52.73	20.0392	1.39368	3.58937e-39	4.17322e-06	2.81852e-06	up	Gh_A01G0290	35.6727	12.068	1.52756	3.51954e-39	9.35853e-05	4.98136e-05	up	Gh_D13G1626	34.1823	14.129	1.36884	0.000125623	0.000450191	7.75e-05	up
Gh_A08G0830	59.7544	22.458	1.43679	9.86271e-41	4.34013e-07	2.12955e-07	up	Gh_A07G0466	29.6203	10.3402	1.52	2.32946e-38	0.00046362	0.000312385	up	Gh_D05G0111	55.2472	23.0282	1.36613	4.12e-05	2.03e-06	1.17e-07	up
Gh_D11G1279	84.6254	30.6061	1.45043	2.97383e-40	7.50915e-10	1.6831e-10	up	Gh_A03G0003	63.5557	20.62	1.56663	4.88672e-42	3.88185e-08	4.73177e-09	up	Gh_D11G0676	1198.74	457.239	1.5284	3.15e-12	9.25e-93	3.14e-194	up
Gh_D04G1090	1216.16	392.897	1.63973	5.25895e-40	2.03269e-25	2.62248e-34	up	Gh_D12G1886	332.643	101.654	1.68539	3.29708e-38	1.08875e-27	1.46976e-48	up	Gh_D12G2112	36.9948	15.8655	1.34881	6.81e-05	0.000251096	3.9e-05	up
Gh_D09G0039	50.8834	19.2702	1.41086	4.8364e-40	5.52976e-06	3.64877e-06	up	Gh_A12G0504	965.393	275.191	1.79179	1.10873e-38	3.81616e-32	8.17173e-62	up	Gh_A02G0765	73.7927	31.0023	1.37153	6.63e-06	1.26e-08	2.68e-10	up
Gh_A13G1728	92.7462	32.9738	1.49071	9.66928e-40	4.69574e-11	5.78681e-12	up	Gh_A03G0803	4726.79	1221.12	1.93384	8.01989e-38	1.29377e-39	1.64245e-49	up	Gh_A03G1284	83.966	35.7401	1.36175	1.42e-05	1.13e-09	1.54e-11	up
Gh_A11G2875	30.6639	11.5015	1.34317	1.40559e-39	0.00118661	0.00127271	up	Gh_D08G1145	527.872	157.673	1.72057	2.51331e-41	7.07744e-29	2.51773e-61	up	Gh_D03G1135	512.079	208.058	1.43529	1.34e-08	8.87e-58	1.17e-75	up
Gh_D07G1908	54.0171	19.7504	1.4204	8.53357e-41	2.39596e-06	1.40424e-06	up	Gh_D01G0090	25.1665	8.14078	1.56654	3.90316e-42	0.00129957	0.000962262	up	Gh_D10G0641	112.752	47.683	1.37458	4.87e-06	3.9e-13	1.08e-15	up
Gh_D01G0544	61.4829	21.8293	1.46044	4.30706e-39	2.46999e-07	1.08383e-07	up	Gh_D09G0168	15.818	4.93842	1.56653	2.43552e-42	0.0139469	0.0150058	up	Gh_D05G0976	20.6413	8.51503	1.36175	2.78e-05	0.0120991	0.00413806	up
Gh_D08G2486	20.5447	7.67531	1.34854	3.53329e-41	0.0108486	0.0132992	up	Gh_D10G0472	84.9902	27.0763	1.61827	5.47749e-39	6.15315e-11	1.49483e-12	up	Gh_A12G2035	25.8087	10.7464	1.38037	1.11e-05	0.00318483	0.000792784	up
Gh_D12G1035	20.5148	8.29991	1.34854	3.53329e-41	0.0108486	0.0132992	up	Gh_D01G1934	45.8298	15.2544	1.56658	7.39732e-39	4.92139e-06	1.42878e-06	up	Gh_D05G2710	334.596	142.409	1.37252	8.71e-07	4.45e-38	2.4e-46	up
Gh_D02G0081	83.5054	29.8612	1.48	2.78191e-40	5.485e-10	1.05603e-10	up	Gh_D07G0353	177.898	53.9365	1.6941	1.02626e-38	2.5993e-21	6.91267e-28	up	Gh_D03G1026	1117.11	418.889	1.55307	0.0105427	2.77e-92	4.37e-185	up
Gh_D07G0417	123.849	42.8521	1.52717	1.1232e-39	1.0295e-14	1.91622e-16	up	Gh_A03G0281	85.5074	27.0447	1.63505	5.42393e-39	3.51977e-11	6.98232e-13	up	Gh_D07G0786	180.681	74.623	1.41038	7.64e-07	1.08e-21	4.72e-26	up
Gh_A13G1985	66.5485	23.5696	1.4719	5.72662e-40	4.64365e-08	1.58749e-08	up	Gh_D01G0480	49.9774	16.0006	1.59544	3.98307e-39	1.28535e-06	2.58407e-07	up	Gh_D13G1381	44.6872	18.6314	1.38329	6.28e-05	2.24e-05	2.04e-06	up
Gh_A11G1231	24.227	9.37269	1.37652	2.30529e-40	0.00479458	0.00542312	up	Gh_A05G2958	52.509	16.5942	1.59382	2.01379e-38	5.61711e-07	1.01666e-07	up	Gh_A04G0894	51.487	21.4736	1.38552	2.03e-05	4.47e-06	2.91e-07	up
Gh_A13G1604	320.148	102.715	1.64287	9.95237e-39	1.0848e-25	2.48221e-38	up	Gh_A04G0378	71.4166	22.1457	1.64972	1.43179e-39	1.73373e-09	8.20012e-11	up	Gh_A02G1679	20.0056	8.30429	1.37383	0.000440267	0.0145868	0.0051682	up
Gh_A01G1615	17.2085	7.26385	1.23213	6.3079e-43	0.0408216	0.0594248	up	Gh_D12G1906	29.1206	8.6444	1.6163	3.88148e-39	0.000334151	0.000183799	up	Gh_D02G0542	74.8315	31.1091	1.3909	8.38e-06	6.74e-09	1.2e-10	up
Gh_A08G0056	17.3311	7.36586	1.23213	6.3079e-43	0.0408216	0.0594248	up	Gh_D08G0014	31.5341	10.3245	1.61164	4.12828e-42	0.000151143	7.40515e-05	up	Gh_D06G1456	16.5267	6.50232	1.3764	0.00123457	0.0339551	0.0144966	up
Gh_D08G0312	52.193	19.4508	1.43861	1.49213e-39	3.14195e-06	1.80527e-06	up	Gh_A07G0301	59.2143	18.1029	1.66702	7.17598e-39	4.31276e-08	3.7791e-09	up	Gh_D03G1116	93.6745	39.28	1.39017	2.08e-05	4.2e-11	2.72e-13	up
Gh_A09G1405	376.73	118.66	1.67178	7.07223e-39	1.0427e-25	1.16969e-40	up	Gh_A12G1728	58.5703	18.0022	1.66702	7.17598e-39	4.31276e-08	3.7791e-09	up	Gh_D10G2187	67.8134	28.0419	1.39393	8e-06	4.15e-08	1.06e-09	up
Gh_D09G2258	55.4972	20.0532	1.44663	6.36585e-40	1.35054e-06	7.03139e-07	up	Gh_D06G1833	42.2223	13.3077	1.63611	5.24485e-40	7.82676e-06	2.07122e-06	up	Gh_A10G2091	611.252	240.362	1.48423	1.21e-07	3.42e-68	8.33e-95	up
Gh_A07G1610	2194.59	686.465	1.6883	1.55962e-39	7.14836e-28	2.29713e-32	up	Gh_A03G1723	110.736	33.0239	1.71676	6.06764e-42	8.42516e-15	7.83234e-18	up	Gh_A06G0687	1131.47	419.306	1.56934	0.00506696	2.5e-94	3.57e-190	up
Gh_D08G0037	102.998	35.628	1.51362	1.79869e-39	2.38758e-12	1.57213e-13	up	Gh_D10G2360	99.7041	30.199	1.70218	1.69549e-39	2.24051e-13	7.1189e-16	up	Gh_A11G2469	158.014	65.0846	1.40972	2.91e-06	6.18e-19	9.99e-23	up
Gh_A13G0065	431.35	140.115	1.63102	2.23844e-39	4.38999e-24	3.72783e-39	up	Gh_A08G2566	43.0719	12.7484	1.66966	3.85478e-42	4.48453e-06	9.56257e-07	up	Gh_D13G2210	38.5929	16.1787	1.38037	5.63e-06	0.000112201	1.41e-05	up
Gh_A01G1844	128.863	44.12	1.55123	1.46752e-40	1.63657e-15	1.66382e-17	up	Gh_A01G0096	50.0117	14.6873	1.68564	3.63141e-39	5.00183e-07	6.57813e-08	up	Gh_D01G0742	35.3092	14.052	1.41066	0.000126127	0.000241897	3.5e-05	up
Gh_D10G2127	265.971	87.047	1.61858	1.68656e-39	3.50385e-25	1.71231e-34	up	Gh_D10G2359	101.887	30.1369	1.73062	5.19332e-39	7.5336e-14	1.41557e-16	up	Gh_D11G0486	34.7379	14.1427	1.41066	0.000126127	0.000241897	3.5e-05	up
Gh_D05G0639	31.566	12.0768	1.38825	7.23334e-40	0.000677058	0.000649936	up	Gh_A08G1350	27.9243	7.78256	1.72701	3.0393e-39	0.000241026	0.000102339	up	Gh_A07G1784	52.8675	21.9846	1.40785	1.72e-05	1.95e-06	1.04e-07	up
Gh_D06G1898	32.078	11.5452	1.38825	7.23334e-40	0.000677058	0.000649936	up	Gh_D08G0947	67.0866	19.0438	1.7731	6.64661e-39	1.04303e-09	2.6175e-11	up	Gh_A01G1774	28.9247	11.5445	1.41238	6.09e-05	0.00118657	0.000234322	up
Gh_A10G2090	216.297	71.2197	1.60957	4.53448e-40	2.07772e-23	1.41103e-29	up	Gh_D07G2004	38.8993	10.9815	1.76182	3.51463e-39	7.09216e-06	1.27767e-06	up	Gh_A04G0975	17.5909	7.34621	1.4024	0.000210798	0.0209855	0.00797021	up
Gh_D09G2122	596.812	186.593	1.68414	7.85405e-40	7.64635e-26	1.41972e-40	up	Gh_A11G0060	32.1277	9.39745	1.75603	1.02293e-39	6.15658e-05	1.84177e-05	up	Gh_D04G1462	17.6874	7.46871	1.4024	0.000210798	0.0209855	0.00797021	up
Gh_D09G1728	86.4067	29.8032	1.51376	2.87404e-39	1.75546e-10	2.42668e-11	up	Gh_D12G2555	36.0009	9.86185	1.7791	1.13592e-38	1.56258e-05	3.20585e-06	up	Gh_A03G1103	19.0595	7.85807	1.38729	3.42e-05	0.0173828	0.00634886	up
Gh_D13G0668	27.4347	10.109	1.39878	4.25885e-41	0.00208855	0.00213732	up	Gh_A05G0508	29.2952	8.19502	1.77676	3.79175e-40	0.00013643	4.59657e-05	up	Gh_A05G3375	18.7754	7.99671	1.38729	3.42e-05	0.0173828	0.00634886	up
Gh_A11G0260	52.7107	18.8008	1.46583	4.35829e-40	1.76063e-06	9.04529e-07	up	Gh_A03G0871	1731.56	416.146	2.03867	1.00198e-38	1.79303e-42	2.68248e-69	up	Gh_A12G0599	18.7897	7.87358	1.38729	3.42e-05	0.0173828	0.00634886	up
Gh_A08G0736	581.14	183.071	1.6761	3.24229e-40	1.32154e-25	2.39504e-40	up	Gh_A07G0924	26.3845	7.41585	1.80261	2.40015e-42	0.00030119	0.000113377	up	Gh_A13G2225	19.0898	7.61736	1.38729	3.42e-05	0.0173828	0.00634886	up
Gh_A01G0514	35.0944	12.6459	1.4046	7.45747e-40	0.000289241	0.000260042	up	Gh_A11G0959	23.1802	5.93848	1.83573	5.8909e-40	0.00067238	0.000280999	up	Gh_D08G2486	18.7816	7.67531	1.38729	3.42e-05	0.0173828	0.00634886	up
Gh_A11G1435	34.8499	12.8989	1.4046	7.45747e-40	0.000289241	0.000260042	up	Gh_D04G1444	40.8682	10.9689	1.83308	4.32197e-40	2.2601e-06	2.45505e-07	up	Gh_D01G1940	15.5186	6.11117	1.39312	0.00139964	0.0407815	0.0181679	up
Gh_D12G1517	35.3516	12.6857	1.4046	7.45747e-40	0.000289241	0.000260042	up	Gh_D09G1187	37.7041	10.0395	1.85607	5.64252e-39	4.97563e-06	6.21264e-07	up	Gh_D13G0233	34.4952	13.9024	1.41947	8.8e-06	0.000294166	4.37e-05	up
Gh_D09G1080	37.6009	13.6017	1.41855	1.34705e-40	0.000125128	0.000103839	up	Gh_A12G1755	27.829	7.03261	1.90758	2.06994e-39	9.73527e-05	2.21612e-05	up	Gh_A13G0219	23.7323	9.84113	1.4024	1.97e-05	0.00463948	0.00123164	up
Gh_A08G2115	41.2504	14.9465	1.43059	2.22838e-39	5.4833e-05	3.99909e-05	up	Gh_A01G2000	16.5651	3.60631	1.94093	1.02107e-42	0.00331622	0.00165396	up	Gh_D13G0836	69.2701	28.1309	1.415	7.68e-06	2.2e-08	4.69e-10	up
Gh_D01G0904	17.5489	6.73399	1.3123	1.01767e-39	0.0242319	0.0328518	up	Gh_A10G0539	897.243	195.611	2.17453	5.5742e-39	4.6876e-45	2.76806e-90	up	Gh_D05G1711	69.9795	28.7444	1.41066	9.09e-06	1.81e-08	3.75e-10	up
Gh_D09G0971	17.9444	7.10372	1.3123	1.01767e-39	0.0242319	0.0328518	up	Gh_D07G2385	36.9192	9.3513	1.96249	8.36574e-40	3.54281e-06	2.78057e-07	up	Gh_D03G0069	32.9313	13.4938	1.42887	0.000131511	0.000356594	5.45e-05	up
Gh_D01G0331	102.542	35.4354	1.5537	9.0433e-40	9.83444e-13	4.53727e-14	up	Gh_D05G2704	21.8637	4.76103	2.014	1.13764e-42	0.000482256	0.000127942	up	Gh_A12G1130	1594.55	553.612	1.66393	6.88e-06	8.05e-130	3.39e-291	up
Gh_D13G1379	103.112	34.8675	1.5537	9.0433e-40	9.83444e-13	4.53727e-14	up	Gh_A08G0937	510.54	112.816	2.15582	1.51918e-39	9.96833e-42	7.52022e-88	up	Gh_A13G0674	95.8407	39.1087	1.42054	1.95e-05	1.18e-11	5.3e-14	up
Gh_A01G1701	152.55	50.432	1.61429	1.48468e-40	9.59765e-19	7.01819e-22	up	Gh_D01G1883	200.345	45.7214	2.0911	1.78654e-39	2.457e-29	5.80899e-42	up	Gh_D06G0939	365.764	149.997	1.42619	1.15e-11	1.7e-43	1.42e-53	up
Gh_A05G0572	150.166	48.7676	1.61464	2.05275e-39	1.83449e-18	1.73643e-21	up	Gh_A10G0948	125.369	29.2835	2.07098	2.85409e-38	7.33946e-20	5.97036e-26	up	Gh_D13G1243	158.944	64.3721	1.44101	1.01e-06	1.34e-19	1.32e-23	up
Gh_A09G2488	115.762	38.6378	1.57045	2.96686e-42	2.30814e-14	4.53664e-16	up	Gh_D05G0507	169.216	37.6318	2.12085	8.39843e-39	3.22561e-26	3.11823e-36	up	Gh_D01G1853	50.0179	20.069	1.42566	1.63e-05	3.5e-06	2.03e-07	up
Gh_A11G2754	164.005	53.2543	1.63102	1.532e-40	5.13175e-20	1.03967e-23	up	Gh_D05G1100	52.1374	12.1319	2.05202	1.35422e-38	9.14203e-09	9.30227e-11	up	Gh_A08G0884	107.123	43.4037	1.43788	2.65e-06	3.41e-13	7.24e-16	up
Gh_D06G1519	63.9901	22.4007	1.52916	2.0043e-40	4.45199e-08	1.22615e-08	up	Gh_A13G0935	74.3544	16.5979	2.07161	2.70636e-42	2.73709e-12	1.97462e-15	up	Gh_D12G2716	36.6124	14.7234	1.44192	7.08e-06	0.000107282	1.25e-05	up
Gh_A09G2229	134.31	44.1445	1.60594	1.0311e-39	1.00004e-16	3.81761e-19	up	Gh_A07G1752	88.9605	20.3434	2.10807	9.00165e-40	8.42516e-15	5.54328e-19	up	Gh_A08G1562	32.1811	12.7362	1.43892	1e-05	0.000431523	6.82e-05	up
Gh_A10G1332	36.3127	12.5138	1.44468	1.35228e-39	0.000164594	0.000132559	up	Gh_D02G1225	2893.2	541.275	2.39981	4.85407e-38	5.44501e-60	8.5089e-85	up	Gh_D12G2435	31.9489	12.5558	1.43892	1e-05	0.000431523	6.82e-05	up
Gh_D12G1518	33.0075	12.2684	1.43198	1.14136e-40	0.000383527	0.000328321	up	Gh_D13G2340	111.617	24.7992	2.12333	4.1931e-40	2.26199e-18	4.6955e-24	up	Gh_D05G0905	90.6131	36.7825	1.4377	1.15e-05	3.15e-11	1.64e-13	up
Gh_A05G1938	25.1685	9.16576	1.43424	2.83099e-40	0.00275675	0.00274267	up	Gh_A01G0280	28.276	6.10755	2.11403	1.32643e-39	4.01313e-05	3.87375e-06	up	Gh_D11G3022	39.3784	15.6197	1.42476	5.78e-05	7.26e-05	7.95e-06	up
Gh_A08G1812	24.6619	8.59819	1.43424	2.83099e-40	0.00275675	0.00274267	up	Gh_D06G2009	29.3202	6.00556	2.16379	1.68238e-40	2.2898e-05	1.56435e-06	up	Gh_D12G2500	469.828	183.089	1.49613	2.09e-07	2.17e-57	9.95e-74	up
Gh_D07G0358	22.0169	7.63758	1.41413	3.2501e-41	0.0062745	0.00696119	up	Gh_A11G2927	68.143	14.3662	2.22175	3.14836e-40	5.52485e-12	1.58547e-15	up	Gh_D12G0554	863.376	324.243	1.54996	6.73e-08	9.97e-87	1.62e-142	up
Gh_A11G1830	385.429	116.553	1.72646	1.83607e-39	4.26282e-27	5.16931e-43	up	Gh_A04G0927	45.0834	9.25477	2.24148	2.75566e-40	3.45928e-08	1.87283e-10	up	Gh_D11G2971	52.0382	20.8599	1.44748	1.78e-05	1.53e-06	7.16e-08	up
Gh_D10G0497	41.6828	14.7413	1.46495	1.34264e-40	3.08728e-05	1.96759e-05	up	Gh_A06G1149	31.0881	6.44328	2.25843	8.92226e-39	7.41636e-06	2.4328e-07	up	Gh_D12G1114	78.9669	31.9969	1.44314	6.56e-06	8.11e-10	8.35e-12	up
Gh_D12G1415	142.197	45.9056	1.62595	1.33449e-40	8.16179e-18	1.3068e-20	up	Gh_D02G0453	207.193	37.1975	2.45109	6.29152e-39	1.6227e-34	4.91209e-53	up	Gh_A12G0086	21.6346	8.88831	1.42887	2.37e-05	0.00669504	0.00190218	up
Gh_A11G0646	64.8286	22.42	1.55136	1.13377e-39	2.51248e-08	5.99648e-09	up	Gh_D01G1853	132.785	20.069	2.68531	1.98027e-42	3.98893e-25	4.83447e-38	up	Gh_D13G1875	22.2177	8.82005	1.42887	2.37e-05	0.00669504	0.00190218	up
Gh_A08G2100	28.3441	10.0267	1.45031	3.01339e-40	0.00118669	0.00107292	up	Gh_A10G1332	86.4815	12.5138	2.66153	1.84348e-42	1.45962e-16	2.54554e-24	up	Gh_A02G1674	58.5161	23.2849	1.45514	0.000150081	2.18e-07	6.78e-09	up
Gh_A09G1825	44.9984	15.6991	1.47315	1.38041e-40	1.2881e-05	7.61014e-06	up	Gh_D11G0676	2.77517	457.239	-7.05369	3.75463e-41	8.35436e-34	1.38574e-233	down	Gh_D06G2249	91.6949	36.7344	1.45347	1.16e-05	1.64e-11	7.11e-14	up
Gh_A03G0871	1420.16	416.146	1.78145	1.0397e-39	4.56804e-30	3.72783e-39	up	Gh_D05G1190	1.03918	108.588	-6.20868	3.23652e-40	1.13532e-11	5.48366e-60	down	Gh_D07G1290	21.4639	8.25284	1.44422	0.000385404	0.00805545	0.0023666	up
Gh_D05G0701	112.939	36.7242	1.60776	1.13574e-40	1.98633e-14	3.17497e-16	up	Gh_D03G1135	5.64427	208.058	-5.02362	1.25687e-41	1.44233e-31	1.64863e-104	down	Gh_A01G1088	68.8299	27.2746	1.46653	9.23e-06	8.98e-09	1.41e-10	up
Gh_A09G2489	148.65	47.2343	1.66451	7.43403e-40	4.79269e-19	2.42574e-22	up	Gh_A09G0635	4.01726	51.9335	-3.56282	4.79397e-41	8.47496e-11	1.1535e-20	down	Gh_A12G0538	953.27	356.971	1.55522	7.49e-13	3.37e-89	3.56e-158	up
Gh_D10G1605	149.492	47.1932	1.66451	7.43403e-40	4.79269e-19	2.42574e-22	up	Gh_D11G2500	11.7196	122.049	-3.31178	6.90616e-40	9.16854e-25	2.09495e-45	down	Gh_D07G0447	70.0716	27.5697	1.46129	1.48e-06	7.4e-09	1.13e-10	up
Gh_D05G0457	31.2524	11.0224	1.46346	3.16781e-40	0.000509762	0.000418997	up	Gh_D02G2031	16.796	166.581	-3.27828	1.25519e-42	4.09296e-33	1.73764e-61	down	Gh_A05G3718	14.1284	5.06911	1.48728	6.27e-05	0.0437704	0.0186527	up
Gh_A07G2086	53.0165	18.4751	1.54178	4.90346e-40	7.28216e-07	2.69208e-07	up	Gh_A01G1279	19.2802	180.77	-3.23815	2.29868e-39	2.01074e-35	7.43689e-66	down	Gh_A11G1554	14.4869	5.41505	1.48728	6.27e-05	0.0437704	0.0186527	up
Gh_D01G1853	59.2555	20.069	1.54704	1.64709e-40	1.34873e-07	4.02387e-08	up	Gh_A05G0320	4.02677	45.6062	-3.38772	4.81701e-41	1.03942e-09	1.59456e-17	down	Gh_D06G2145	42.6473	17.0499	1.43634	4.34e-06	2.14e-05	1.79e-06	up
Gh_A06G0682	25.8716	8.86195	1.48973	3.43476e-41	0.00155582	0.00136458	up	Gh_D09G1582	2.3572	27.3947	-3.47788	9.08259e-40	6.66512e-06	1.25022e-10	down	Gh_A01G1321	152.376	60.3104	1.46842	1.11e-06	3.32e-19	3.44e-23	up
Gh_A07G2310	25.859	9.38597	1.48973	3.43476e-41	0.00155582	0.00136458	up	Gh_A08G2105	63.3967	485.427	-2.9568	5.48305e-39	5.4309e-62	1.60338e-127	down	Gh_A08G1769	24.9525	9.67475	1.46129	1.77e-05	0.00251807	0.000555202	up
Gh_D03G0836	26.3592	9.12246	1.48973	3.43476e-41	0.00155582	0.00136458	up	Gh_A02G1200	1.13301	18.5406	-3.71887	3.22271e-40	0.000266753	5.37938e-08	down	Gh_A01G0149	104.117	41.3157	1.46476	7.37e-07	3.91e-13	7.69e-16	up
Gh_D08G1717	18.805	7.03815	1.38825	3.26855e-40	0.0142984	0.01714	up	Gh_A09G1010	2.42131	22.5016	-3.2511	1.03628e-39	3.58919e-05	1.44017e-08	down	Gh_A04G1412	39.6638	15.7656	1.46129	5.4e-05	3.85e-05	3.48e-06	up
Gh_D04G0335	109.109	34.9217	1.63504	1.03299e-40	2.99131e-14	4.66023e-16	up	Gh_A11G2110	3.18819	30.6127	-3.18838	3.18731e-41	9.95096e-07	3.10611e-11	down	Gh_A13G1960	57.2048	22.3889	1.4804	2.32e-06	2.32e-07	6.95e-09	up
Gh_A05G0961	15.6563	6.16291	1.35369	1.45858e-40	0.0315787	0.0421994	up	Gh_A03G0943	2.82795	28.7056	-3.09374	3.27284e-41	2.50402e-06	3.04401e-10	down	Gh_D11G3481	32.9234	12.8734	1.48332	9.22e-06	0.000228356	3.01e-05	up
Gh_D07G2266	16.4945	5.80583	1.35369	1.45858e-40	0.0315787	0.0421994	up	Gh_D08G2475	140.09	795.088	-2.52273	5.80169e-39	1.30242e-56	4.62745e-104	down	Gh_D11G0166	29.1091	11.0414	1.47378	0.000174332	0.000769015	0.000130935	up
Gh_D12G1201	15.9711	6.29117	1.35369	1.45858e-40	0.0315787	0.0421994	up	Gh_D01G0592	15.7075	111.266	-2.7754	4.78328e-40	5.68797e-22	1.15326e-34	down	Gh_D01G1778	89.6566	35.1428	1.48147	1.05e-06	1.55e-11	5.99e-14	up
Gh_A11G0230	95.6066	31.0892	1.62509	2.24067e-40	1.35129e-12	4.81813e-14	up	Gh_D07G1927	8.93573	65.3622	-2.80406	2.5626e-39	3.02536e-13	1.57393e-20	down	Gh_A03G0170	56.1679	21.5095	1.48728	1.48e-05	2.83e-07	8.65e-09	up
Gh_A05G0415	530.872	158.5	1.74878	1.89489e-39	2.58679e-27	7.46529e-44	up	Gh_A08G1859	3.85385	30.6202	-2.82581	5.27433e-41	1.30327e-06	5.60608e-10	down	Gh_D09G0057	19.818	7.75762	1.46129	2.98e-05	0.00972352	0.00293991	up
Gh_A06G1663	43.9294	15.382	1.53129	5.0637e-41	9.44888e-06	4.70211e-06	up	Gh_A09G1400	14.6237	97.6153	-2.68663	8.10312e-39	2.94759e-19	1.62983e-29	down	Gh_A04G0100	27.9604	10.7835	1.48728	2.55e-08	0.000932905	0.000161345	up
Gh_A03G2013	113.299	36.2296	1.64675	1.01755e-40	7.95789e-15	7.97854e-17	up	Gh_D04G0335	4.57851	34.9217	-2.70877	2.01879e-40	2.69532e-07	9.60974e-11	down	Gh_A12G2271	38.4114	14.6282	1.4804	6.48e-06	5.66e-05	5.4e-06	up
Gh_A04G1193	64.4162	20.909	1.59475	1.62767e-40	1.8162e-08	3.46469e-09	up	Gh_A02G0378	4.08151	28.5055	-2.73117	5.51252e-41	3.5744e-06	5.10916e-09	down	Gh_D05G0874	37.9291	14.6274	1.4804	6.48e-06	5.66e-05	5.4e-06	up
Gh_D09G1409	174.53	53.491	1.72454	3.09525e-40	1.60375e-22	2.14052e-27	up	Gh_A01G1126	29.6373	144.933	-2.27338	1.34238e-38	5.69626e-25	5.05643e-36	down	Gh_D05G0507	96.4036	37.6318	1.4764	1.69e-06	3.01e-12	8.52e-15	up
Gh_D09G0854	135.727	41.835	1.69359	2.66338e-40	4.88735e-18	5.25315e-21	up	Gh_A11G2286	3.38013	19.23	-2.49648	5.51619e-41	0.00037506	1.81074e-05	down	Gh_D13G0059	61.0819	23.94	1.48514	4.08e-09	6.77e-08	1.54e-09	up
Gh_A05G0161	24.2459	7.87518	1.53699	6.84554e-43	0.00205077	0.00171443	up	Gh_A05G0867	4.43149	23.8581	-2.46323	6.67519e-41	5.14614e-05	1.02553e-06	down	Gh_D06G1593	2527.35	805.46	1.78739	4.55e-11	3.57e-161	0	up
Gh_D10G0773	23.6299	7.81331	1.53699	6.84554e-43	0.00205077	0.00171443	up	Gh_A07G1315	9.12457	47.0204	-2.34042	1.05557e-40	5.98747e-09	3.77191e-12	down	Gh_A05G0493	15.4019	5.64475	1.46129	0.000305879	0.0365336	0.0151231	up
Gh_D12G2247	147.715	44.904	1.71688	3.04572e-39	1.20854e-19	3.06533e-23	up	Gh_A07G1129	4.4868	23.2514	-2.4031	7.09314e-41	8.83089e-05	2.83003e-06	down	Gh_D03G0414	15.3819	5.93365	1.46129	0.000305879	0.0365336	0.0151231	up
Gh_D11G3304	666.819	189.21	1.82875	6.37185e-40	3.39139e-30	1.55868e-46	up	Gh_A03G0151	2.75049	18.242	-2.42053	4.65273e-40	0.000644606	4.94776e-05	down	Gh_D03G1414	15.3875	5.87041	1.46129	0.000305879	0.0365336	0.0151231	up
Gh_D10G2360	95.1056	30.199	1.6566	6.76447e-40	9.81733e-13	2.75699e-14	up	Gh_D01G1622	2.78489	17.6138	-2.42053	4.65273e-40	0.000644606	4.94776e-05	down	Gh_D07G1016	24.4453	9.20409	1.4764	0.000274335	0.00303415	0.000686927	up
Gh_A01G1843	172.894	52.2164	1.7352	1.76787e-39	1.65717e-22	2.31346e-27	up	Gh_A08G1444	6.48133	32.4013	-2.34038	6.52977e-40	2.82633e-06	2.4177e-08	down	Gh_A09G1748	50.7425	19.6625	1.48986	2.27e-05	1.18e-06	4.86e-08	up
Gh_A05G3820	27.3381	9.09379	1.54317	5.97215e-40	0.000872642	0.000661453	up	Gh_A13G1960	4.36328	22.3889	-2.34037	1.03077e-39	0.000153613	7.80587e-06	down	Gh_A10G0212	333	129.683	1.49634	2.99e-07	1.91e-42	3.12e-52	up
Gh_A07G1363	26.6499	9.04376	1.54317	5.97215e-40	0.000872642	0.000661453	up	Gh_A06G1269	183.193	677.108	-1.90526	3.38974e-39	7.73109e-35	2.53195e-67	down	Gh_D07G1956	65.8189	25.4311	1.51133	1.03e-05	1.02e-08	1.45e-10	up
Gh_D03G1822	190.561	57.1533	1.74661	1.8217e-39	2.60238e-24	3.27924e-30	up	Gh_D06G2148	2.90611	17.3117	-2.34036	5.82526e-40	0.00112068	0.00013194	down	Gh_D06G1068	58.4458	22.3988	1.50549	2.21e-06	1.22e-07	2.96e-09	up
Gh_D12G0153	76.6777	24.178	1.67124	1.71074e-40	1.34144e-10	8.58809e-12	up	Gh_D05G2420	4.01788	20.6038	-2.27478	1.12044e-39	0.000267806	2.08691e-05	down	Gh_A12G2299	35.4177	13.302	1.51376	0.000122609	0.000100882	1.04e-05	up
Gh_A06G1641	51.5904	17.0991	1.59473	8.50043e-40	5.21378e-07	1.59498e-07	up	Gh_D10G2193	17.9496	78.1369	-2.1038	1.73617e-38	2.47495e-13	1.33254e-17	down	Gh_D12G2421	34.8024	13.2653	1.51376	0.000122609	0.000100882	1.04e-05	up
Gh_D01G1136	14.3415	5.18046	1.40829	2.04775e-40	0.0419659	0.0537223	up	Gh_D11G0246	22.6417	98.7085	-2.10082	4.65417e-39	1.45599e-16	2.93617e-22	down	Gh_A06G0545	18.089	6.66926	1.50193	0.000201566	0.0138399	0.00446214	up
Gh_D10G2527	13.5741	5.42156	1.40829	2.04775e-40	0.0419659	0.0537223	up	Gh_A11G2206	83.7544	315.625	-1.92602	7.31913e-42	1.12207e-33	5.40302e-60	down	Gh_D10G2566	17.5969	6.93454	1.50193	0.000201566	0.0138399	0.00446214	up
Gh_D13G0428	13.5193	4.66261	1.40829	2.04775e-40	0.0419659	0.0537223	up	Gh_D07G1945	17.7988	75.2928	-2.04757	7.92742e-39	1.44442e-12	2.3872e-16	down	Gh_D12G1372	17.8446	6.67646	1.50193	0.000201566	0.0138399	0.00446214	up
Gh_D02G1254	2061.48	554.684	1.90311	1.01297e-41	3.96202e-35	1.87518e-41	up	Gh_A02G0236	199.944	686.962	-1.79843	3.99518e-39	1.17986e-31	5.06262e-61	down	Gh_A02G0645	41.4025	15.8268	1.49691	5.07e-05	2.02e-05	1.51e-06	up
Gh_D11G0244	190.904	56.3404	1.77192	1.70696e-39	9.60042e-25	7.51001e-31	up	Gh_D05G0161	7.7588	35.7568	-2.12082	2.02178e-42	1.59314e-06	2.64487e-08	down	Gh_D13G0189	40.6908	15.7462	1.49691	5.07e-05	2.02e-05	1.51e-06	up
Gh_D10G0472	87.332	27.0763	1.67972	1.79e-40	6.15935e-12	2.22026e-13	up	Gh_D05G1245	10.5028	48.4435	-2.09484	1.36301e-40	1.93276e-08	7.80847e-11	down	Gh_A04G0199	22.6764	8.82931	1.493	2.11e-05	0.00366296	0.000855456	up
Gh_A06G1149	16.8476	6.44328	1.43858	2.45174e-40	0.0185999	0.0218889	up	Gh_A06G1217	7.15454	31.9987	-2.13393	3.04153e-39	6.66512e-06	1.81721e-07	down	Gh_D13G1983	71.7009	27.0675	1.52793	8.18e-06	1.29e-09	1.11e-11	up
Gh_A07G1238	16.9681	6.30916	1.43858	2.45174e-40	0.0185999	0.0218889	up	Gh_A11G2438	3.63694	18.5729	-2.13391	1.00876e-40	0.000831711	0.000138919	down	Gh_A05G0054	39.7875	15.2842	1.50709	1.42e-05	2.45e-05	1.87e-06	up
Gh_D07G0552	136.111	39.8976	1.76313	2.27768e-40	7.30799e-19	2.8236e-22	up	Gh_A11G3166	4.24819	19.0302	-2.13391	1.00876e-40	0.000831711	0.000138919	down	Gh_A06G0886	39.6385	15.337	1.50709	1.42e-05	2.45e-05	1.87e-06	up
Gh_A10G0474	58.1492	17.6912	1.67069	1.26048e-40	3.90563e-08	6.18269e-09	up	Gh_A12G2228	4.07093	18.5247	-2.13391	1.00876e-40	0.000831711	0.000138919	down	Gh_D02G1348	82.4504	31.1502	1.51963	4.9e-06	7.25e-11	3.48e-13	up
Gh_A13G1845	125.875	36.9591	1.76431	6.99997e-40	1.12052e-17	1.06038e-20	up	Gh_A08G0954	8.89733	39.316	-2.07432	1.30309e-40	6.69826e-07	9.74588e-09	down	Gh_A02G1280	29.2709	10.5204	1.53791	2.33e-08	0.000489919	7.04e-05	up
Gh_A08G2307	41.3041	13.4958	1.6299	3.96555e-41	8.96591e-06	3.38183e-06	up	Gh_D01G2294	14.3119	57.9256	-2.03091	2.48356e-42	8.11546e-10	1.52599e-12	down	Gh_A03G0225	37.5927	14.3951	1.52931	8.98e-05	3.6e-05	2.88e-06	up
Gh_A09G1570	18.1615	6.11021	1.51875	1.6876e-41	0.0107711	0.0110753	up	Gh_D12G1661	4.64912	23.4887	-2.1136	3.20205e-40	0.000203357	2.14337e-05	down	Gh_D01G0588	38.3309	14.1689	1.52931	8.98e-05	3.6e-05	2.88e-06	up
Gh_A11G1717	18.0491	6.4421	1.51875	1.6876e-41	0.0107711	0.0110753	up	Gh_D05G2500	5.5287	27.1227	-2.09937	4.3514e-40	4.92335e-05	3.14754e-06	down	Gh_D06G1514	26.0355	9.79709	1.51787	2.96e-05	0.00135401	0.000247044	up
Gh_D09G0876	226.504	62.5263	1.85246	2.93677e-40	6.7991e-29	3.88029e-38	up	Gh_D08G1739	6.72971	31.0979	-2.08884	9.90402e-41	1.17644e-05	4.67314e-07	down	Gh_A08G2003	61.675	23.4293	1.53897	2.94e-05	2.22e-08	3.44e-10	up
Gh_A02G1268	2465.66	658.563	1.91418	3.22023e-39	1.05736e-35	1.70595e-40	up	Gh_D04G2024	14.4239	56.2583	-1.98072	2.57544e-42	2.65216e-09	1.0045e-11	down	Gh_D10G1012	170.807	63.8045	1.55721	1.02e-06	3.16e-23	2.29e-28	up
Gh_D10G0595	21.2052	6.65146	1.52911	1.55233e-40	0.00472863	0.00441539	up	Gh_A02G1340	63.4836	219.201	-1.80942	1.19287e-38	9.97988e-27	4.90346e-40	down	Gh_A05G1823	17.149	6.1786	1.52638	0.00023288	0.0165359	0.00548766	up
Gh_D13G2503	105.272	30.8129	1.75379	5.88891e-40	7.15687e-15	3.72223e-17	up	Gh_D07G1832	28.1248	104.961	-1.90704	3.39677e-39	5.52482e-16	8.20334e-21	down	Gh_A06G1149	16.8914	6.44328	1.52638	0.00023288	0.0165359	0.00548766	up
Gh_A09G0700	26.4786	8.46849	1.6502	6.04294e-41	0.000640964	0.000383629	up	Gh_A02G0393	5.28237	22.2992	-2.05086	2.70601e-39	0.000361093	5.40359e-05	down	Gh_A09G0368	16.8243	6.26378	1.52638	0.00023288	0.0165359	0.00548766	up
Gh_A07G0114	251.068	67.7326	1.88813	9.44485e-40	6.60577e-31	3.16343e-42	up	Gh_D08G1454	3.71987	17.9068	-2.05796	1.55113e-39	0.00148147	0.000345987	down	Gh_A11G2364	16.9816	6.46846	1.52638	0.00023288	0.0165359	0.00548766	up
Gh_A05G2909	15.2087	5.42095	1.5045	7.62848e-41	0.0242319	0.0276486	up	Gh_A05G0717	11.3048	43.8964	-1.97065	8.50307e-40	2.17994e-07	3.36259e-09	down	Gh_A13G2154	16.5594	6.11932	1.52638	0.00023288	0.0165359	0.00548766	up
Gh_A05G2955	14.8704	4.75865	1.5045	7.62848e-41	0.0242319	0.0276486	up	Gh_D12G1398	13.8885	54.3986	-1.92872	8.40759e-40	9.07643e-09	6.19946e-11	down	Gh_D05G0612	17.1594	6.14198	1.52638	0.00023288	0.0165359	0.00548766	up
Gh_A09G0455	82.9448	23.821	1.77885	4.69817e-40	3.8388e-12	7.06593e-14	up	Gh_A11G1225	5.86723	25.1428	-1.99043	4.89332e-40	0.00015554	2.03141e-05	down	Gh_D06G1915	17.3042	6.38732	1.52638	0.00023288	0.0165359	0.00548766	up
Gh_D11G3083	172.296	46.6039	1.87124	2.2402e-42	1.86268e-24	2.22188e-30	up	Gh_A07G1108	190.123	573.093	-1.61058	1.9779e-39	8.92588e-26	1.25027e-51	down	Gh_D03G1505	40.5209	15.1406	1.52501	0.000147464	1.78e-05	1.22e-06	up
Gh_D05G3808	26.5703	7.99059	1.70364	1.37499e-40	0.000353961	0.000183544	up	Gh_D06G1939	37.3671	124.857	-1.76174	1.45778e-39	3.90334e-17	3.10163e-22	down	Gh_A10G0603	69.4524	25.7493	1.54745	7.57e-06	2.29e-09	2.12e-11	up
Gh_D07G2254	27.052	8.10784	1.70364	1.37499e-40	0.000353961	0.000183544	up	Gh_A09G0764	393.661	1165.84	-1.58411	7.35184e-39	1.0836e-25	2.57613e-44	down	Gh_A01G1863	32.2253	11.7656	1.5544	4.7e-05	0.000177584	1.97e-05	up
Gh_D08G0310	18.5114	6.34293	1.5947	9.06185e-41	0.00612673	0.00543254	up	Gh_D03G1026	135.499	418.889	-1.65115	4.13208e-38	6.55637e-27	2.56305e-54	down	Gh_A10G2203	31.8862	11.6159	1.5544	4.7e-05	0.000177584	1.97e-05	up
Gh_D09G1775	66.4329	18.5955	1.77967	4.82153e-41	8.4215e-10	4.27424e-11	up	Gh_A08G2543	32.993	112.577	-1.77936	1.4502e-38	6.84827e-16	2.09076e-20	down	Gh_A11G0725	31.8133	11.5888	1.5544	4.7e-05	0.000177584	1.97e-05	up
Gh_D08G0380	43.6501	12.8357	1.7306	3.43229e-41	1.50628e-06	3.22934e-07	up	Gh_A07G2341	18.2238	62.8753	-1.79778	9.09545e-40	1.77162e-09	1.41187e-11	down	Gh_A04G0863	2642.64	797.128	1.86654	4.5e-11	3.42e-174	0	up
Gh_A10G1862	247.664	63.6665	1.9576	2.59241e-40	3.08541e-32	3.71435e-44	up	Gh_A02G0063	3.81784	17.0832	-1.97779	1.43678e-40	0.00266029	0.000854398	down	Gh_A13G0221	51.6404	19.488	1.5544	2.87e-06	3.85e-07	1.08e-08	up
Gh_A01G0531	79.5523	22.2788	1.8489	5.24668e-41	3.41246e-12	4.00086e-14	up	Gh_A10G0372	8.24291	30.5367	-1.90827	2.50264e-42	2.9659e-05	2.68072e-06	down	Gh_D12G1439	24.7741	9.42681	1.53529	0.000247182	0.00162444	0.000302775	up
Gh_D10G1353	31.2991	8.71925	1.73909	2.50973e-41	8.44318e-05	3.19118e-05	up	Gh_D05G0532	4.61716	20.0694	-1.91656	3.27767e-39	0.00114555	0.000316036	down	Gh_D06G0788	1636.7	522.647	1.78454	5.25e-07	1.23e-146	0	up
Gh_D12G0864	15.8279	4.84702	1.5947	2.9206e-41	0.0140084	0.0135274	up	Gh_D09G2122	58.485	186.593	-1.70005	9.50277e-40	1.9521e-22	1.66915e-31	down	Gh_D08G0811	20.6873	7.68746	1.53168	2.63e-05	0.00524199	0.00129855	up
Gh_A08G0301	49.3378	13.8048	1.78113	1.96844e-40	1.93249e-07	2.54052e-08	up	Gh_A09G0284	6.78357	27.3814	-1.89291	6.7492e-40	0.000120686	1.81912e-05	down	Gh_D06G0371	28.3895	10.4408	1.5544	0.000365869	0.000591741	8.7e-05	up
Gh_A13G0935	59.7043	16.5979	1.79936	4.0027e-41	4.68897e-09	2.89727e-10	up	Gh_A05G3949	338.678	931.513	-1.47777	2.30858e-41	2.12277e-22	9.93659e-41	down	Gh_D05G1519	259.627	96.0342	1.56926	1.14e-08	1.7e-35	1.34e-43	up
Gh_D03G0408	1573.82	387.187	2.03421	3.77679e-39	5.50804e-39	1.53495e-49	up	Gh_A11G0276	5.99091	22.6286	-1.87259	4.4752e-41	0.000496945	0.00011723	down	Gh_D04G1442	362.845	136.215	1.55039	5.27e-07	3.97e-48	6.86e-60	up
Gh_D11G0279	22.554	7.36578	1.65744	4.3025e-41	0.00149259	0.00099112	up	Gh_D07G0895	6.18757	22.5085	-1.87259	4.4752e-41	0.000496945	0.00011723	down	Gh_D07G0448	163.321	60.1935	1.56922	9.5e-07	2.3e-22	2.45e-27	up
Gh_A10G1622	12.6154	4.43482	1.5947	6.32608e-40	0.0310663	0.0339991	up	Gh_D01G1682	13.6078	49.7286	-1.81873	5.34089e-39	1.00952e-07	2.22161e-09	down	Gh_A07G0938	40.4807	14.8296	1.5544	5.69e-06	1.56e-05	9.8e-07	up
Gh_A12G0696	12.9113	3.75697	1.5947	6.32608e-40	0.0310663	0.0339991	up	Gh_D09G0792	97.1561	294.985	-1.62019	3.41312e-39	1.0836e-25	2.35211e-44	down	Gh_D07G0842	40.6952	15.1415	1.54272	1.33e-05	1.29e-05	7.88e-07	up
Gh_A13G0480	13.3234	4.10521	1.5947	6.32608e-40	0.0310663	0.0339991	up	Gh_A05G0073	66.8783	205.297	-1.62601	8.56406e-42	2.12277e-22	2.73403e-32	down	Gh_D10G1938	26.5414	9.65194	1.54535	0.000324555	0.000992059	0.000161934	up
Gh_D04G1118	12.813	4.30171	1.5947	6.32608e-40	0.0310663	0.0339991	up	Gh_A11G0366	5.24693	19.0409	-1.84441	4.69435e-40	0.00205866	0.000756665	down	Gh_A12G0803	23.5966	8.87121	1.5544	1.9e-05	0.00195695	0.000371758	up
Gh_D06G0291	13.1103	3.54518	1.5947	6.32608e-40	0.0310663	0.0339991	up	Gh_A13G0846	3.53149	16.0315	-1.8929	1.73731e-40	0.0046969	0.0020431	down	Gh_A13G0171	30.8002	11.289	1.57	0.00014725	0.000213116	2.43e-05	up
Gh_D06G0344	12.7379	4.2882	1.5947	6.32608e-40	0.0310663	0.0339991	up	Gh_D06G0151	4.4867	16.4811	-1.8929	1.73731e-40	0.0046969	0.0020431	down	Gh_D10G1050	30.7456	11.0948	1.57	0.00014725	0.000213116	2.43e-05	up
Gh_D09G0421	12.8732	4.34916	1.5947	6.32608e-40	0.0310663	0.0339991	up	Gh_D13G1392	4.32591	15.8007	-1.8929	1.73731e-40	0.0046969	0.0020431	down	Gh_D06G0592	16.436	5.53361	1.5544	0.000260532	0.0198384	0.00668395	up
Gh_D08G1802	19.8528	5.62942	1.66685	8.57215e-41	0.00348482	0.00255717	up	Gh_D03G1246	19.5548	65.6391	-1.7163	1.02887e-39	1.97432e-09	2.22173e-11	down	Gh_D02G2236	14.7385	5.43871	1.58682	5.05e-05	0.0235765	0.00823694	up
Gh_D04G1229	66.5093	17.5128	1.87716	3.15256e-40	1.80664e-10	3.83964e-12	up	Gh_D09G1404	52.7374	164.271	-1.63988	3.62174e-38	1.44351e-19	2.69049e-26	down	Gh_D13G2211	14.8075	5.18257	1.58682	5.05e-05	0.0235765	0.00823694	up
Gh_A11G2919	111.247	28.829	1.92826	4.54437e-40	2.90237e-17	1.02605e-20	up	Gh_A10G0807	7.73904	28.574	-1.81363	2.39998e-39	9.32193e-05	1.56719e-05	down	Gh_D05G3710	67.5581	24.8141	1.58297	7.77e-06	1.75e-09	1.35e-11	up
Gh_D04G0414	33.0458	9.39081	1.8279	2.3241e-41	2.60328e-05	6.33279e-06	up	Gh_A11G2851	5.8784	21.7049	-1.80985	6.19177e-40	0.000887731	0.00027635	down	Gh_A08G0291	75.6459	27.8958	1.57993	1.19e-06	1.45e-10	6.45e-13	up
Gh_A12G2185	155.399	38.6106	1.98742	7.12091e-41	5.78242e-24	5.62791e-30	up	Gh_D11G0511	5.68774	21.917	-1.80985	6.19177e-40	0.000887731	0.00027635	down	Gh_D11G0852	19.4386	6.85382	1.57993	0.000176255	0.00757529	0.00194093	up
Gh_A13G2000	63.4122	16.766	1.86919	8.77623e-41	7.59718e-10	2.32587e-11	up	Gh_A02G1781	9.41155	32.1878	-1.79289	9.69831e-40	4.08757e-05	5.54781e-06	down	Gh_A10G1346	200.799	72.4224	1.6105	2.22e-07	2.12e-28	6.05e-35	up
Gh_D10G2310	69.3025	17.8264	1.91929	2.23387e-40	5.48118e-11	7.0096e-13	up	Gh_A06G0066	29.0245	93.4521	-1.68298	4.38572e-39	1.3291e-12	1.46577e-15	down	Gh_A03G0901	596.627	206.756	1.66724	7.64e-08	9.11e-79	3.94e-109	up
Gh_D05G2704	17.11	4.76103	1.67959	6.62469e-41	0.00791023	0.00650961	up	Gh_A09G0073	11.349	37.5512	-1.76169	1.03775e-39	7.56559e-06	6.90942e-07	down	Gh_D04G1170	1107.67	365.174	1.73861	1.46e-06	3.85e-110	1.06e-214	up
Gh_D13G2399	166.776	40.6754	2.02356	1.70263e-40	6.99442e-26	5.57349e-33	up	Gh_A09G2418	10.0018	33.9285	-1.73466	1.89124e-40	3.17027e-05	4.58264e-06	down	Gh_A06G1269	2280.98	677.108	1.88949	2.51e-11	6.16e-177	0	up
Gh_A05G0520	20.9793	6.13214	1.73556	3.37496e-41	0.00193437	0.00117075	up	Gh_A02G1361	6.03178	21.2695	-1.74426	6.84024e-40	0.00158084	0.000630744	down	Gh_D06G0999	29.2388	10.1443	1.60502	0.000335905	0.000311776	3.64e-05	up
Gh_D12G1364	34.0568	9.34098	1.87034	5.25565e-41	1.39692e-05	2.74874e-06	up	Gh_D13G0007	6.01086	20.743	-1.74426	6.84024e-40	0.00158084	0.000630744	down	Gh_A10G1805	45.7775	16.8013	1.57546	5.77e-05	1.95e-06	7.37e-08	up
Gh_A13G1380	38.0341	10.4814	1.88422	2.36625e-41	3.241e-06	4.61085e-07	up	Gh_D13G1985	15.5996	51.6347	-1.68836	3.35012e-42	2.01087e-07	8.23286e-09	down	Gh_D10G1707	46.2842	16.5851	1.57546	5.77e-05	1.95e-06	7.37e-08	up
Gh_A10G1084	14.1432	3.61822	1.69779	4.53443e-41	0.0179406	0.016218	up	Gh_D07G1229	21.9209	67.7447	-1.62475	3.8357e-42	4.00482e-09	7.32165e-11	down	Gh_D12G1005	39.927	14.3379	1.60331	7.91e-05	9.81e-06	5.02e-07	up
Gh_D07G2265	13.7304	3.77797	1.69779	4.53443e-41	0.0179406	0.016218	up	Gh_A05G1145	7.43726	23.7116	-1.72626	1.50496e-40	0.000686542	0.000228401	down	Gh_D01G1541	71.6041	25.7695	1.60885	6.76e-06	3.12e-10	1.49e-12	up
Gh_D04G0951	31.1282	7.75373	1.89956	1.48325e-40	3.37195e-05	6.96257e-06	up	Gh_D13G0680	7.05229	24.4794	-1.72626	1.50496e-40	0.000686542	0.000228401	down	Gh_A07G2285	13.6473	4.783	1.62479	0.00101221	0.0282769	0.00997641	up
Gh_A10G1894	38.8587	10.2558	1.92121	5.33987e-43	1.7742e-06	2.00484e-07	up	Gh_D04G1399	48.1484	140.507	-1.5639	3.70384e-38	2.07688e-16	3.58252e-21	down	Gh_D07G1463	13.903	4.63133	1.62479	0.00101221	0.0282769	0.00997641	up
Gh_A12G2465	58.5192	14.6583	1.9504	4.8655e-40	1.27449e-09	2.69618e-11	up	Gh_D07G0812	9.83115	32.6482	-1.69223	1.98313e-40	5.65363e-05	1.05198e-05	down	Gh_A05G2440	36.1362	12.9088	1.60885	7.29e-06	3.31e-05	2.25e-06	up
Gh_A10G0539	918.173	195.611	2.23713	1.58826e-40	3.08599e-44	3.03549e-64	up	Gh_A01G1923	33.1557	99.8506	-1.60375	1.77368e-38	1.01155e-12	1.27463e-15	down	Gh_D13G0235	31.8549	11.181	1.6158	0.000136376	0.000112437	1.01e-05	up
Gh_A10G2003	68.4729	16.6448	1.97855	1.29967e-39	3.86076e-11	3.15194e-13	up	Gh_D09G0853	35.2908	104.364	-1.57643	1.76083e-39	6.79355e-13	7.5512e-16	down	Gh_A07G0459	20.9354	7.26619	1.62479	0.000142153	0.00338517	0.000676116	up
Gh_A10G1144	19.0068	5.31639	1.83571	6.14244e-41	0.00250046	0.00133707	up	Gh_A01G0805	8.64134	29.9026	-1.70126	6.19558e-39	0.000129888	2.9709e-05	down	Gh_A11G3177	20.9953	7.02395	1.62479	0.000142153	0.00338517	0.000676116	up
Gh_D07G0550	19.0876	4.8937	1.83571	6.14244e-41	0.00250046	0.00133707	up	Gh_A09G1746	9.36161	29.5265	-1.70126	6.19558e-39	0.000129888	2.9709e-05	down	Gh_A08G2270	38.5904	13.9938	1.61741	5.98e-06	1.18e-05	6.14e-07	up
Gh_D06G0286	15.316	3.82817	1.79401	1.74993e-43	0.0101841	0.00756693	up	Gh_D09G2158	15.8832	51.2819	-1.66061	1.06872e-39	3.66703e-07	1.90532e-08	down	Gh_D13G1392	43.9596	15.8007	1.59879	4.15e-05	2.85e-06	1.12e-07	up
Gh_D04G1444	44.8149	10.9689	1.99399	2.23939e-41	1.28744e-07	6.17145e-09	up	Gh_A12G1219	20.5582	62.9037	-1.58097	1.19977e-39	3.04266e-08	1.07169e-09	down	Gh_A09G2067	22.4658	7.99227	1.59879	2.29e-05	0.00280523	0.000555202	up
Gh_A05G1463	279.395	60.2987	2.22005	1.79373e-40	3.97123e-39	2.41867e-57	up	Gh_A01G0224	22.0831	66.1263	-1.58199	3.99436e-42	1.2911e-08	3.65733e-10	down	Gh_D05G2709	21.864	7.56937	1.59879	2.29e-05	0.00280523	0.000555202	up
Gh_D01G1883	209.34	45.7214	2.18284	3.63261e-40	5.37315e-33	7.65959e-45	up	Gh_A05G1444	15.0029	46.5005	-1.63415	3.47786e-39	1.5427e-06	1.255e-07	down	Gh_A12G1454	104.012	36.8262	1.63035	9.48e-06	5.92e-15	2.07e-18	up
Gh_D05G0407	28.0752	6.89167	1.93574	3.47795e-41	7.8314e-05	1.7436e-05	up	Gh_A01G0783	11.3299	35.1742	-1.64464	1.18026e-39	4.3883e-05	8.37786e-06	down	Gh_A07G0301	52.1781	18.1029	1.63035	1.45e-05	1.51e-07	2.77e-09	up
Gh_A05G2440	55.6378	12.9088	2.07506	2.36891e-41	1.17536e-09	1.15506e-11	up	Gh_D02G0220	11.1057	34.5479	-1.64464	1.18026e-39	4.3883e-05	8.37786e-06	down	Gh_D05G2338	35.502	12.0427	1.64525	0.000226745	2.88e-05	1.77e-06	up
Gh_D10G2162	38.9201	9.34293	2.0656	1.83274e-41	7.05654e-07	3.67634e-08	up	Gh_A01G1826	6.19131	20.4826	-1.67555	7.63979e-40	0.00282575	0.00142115	down	Gh_D10G0360	41.4215	14.0232	1.63893	7.46e-05	5.05e-06	2.04e-07	up
Gh_D05G2284	16.2392	4.13071	1.88421	1.32009e-40	0.00573355	0.00335451	up	Gh_A03G1947	5.5505	20.4326	-1.67555	7.63979e-40	0.00282575	0.00142115	down	Gh_D11G1446	89.489	31.4358	1.63781	5.48e-06	6.95e-13	7.11e-16	up
Gh_A04G0927	41.8569	9.25477	2.17121	3.97807e-41	1.22548e-07	2.40635e-09	up	Gh_D06G0035	28.4538	82.3986	-1.55209	6.44485e-40	2.95559e-10	3.05815e-12	down	Gh_D04G1363	1679.53	497.105	1.89369	8.38e-12	1.15e-162	0	up
Gh_D11G1131	269.703	51.5864	2.37737	1.38077e-40	1.65671e-41	1.10995e-61	up	Gh_A08G2179	8.13071	25.8413	-1.6589	3.3921e-42	0.000531241	0.000184077	down	Gh_D04G1053	60.4472	20.8457	1.65393	1.24e-05	7.94e-09	6.77e-11	up
Gh_D09G2341	31.4266	6.70437	2.08013	3.08015e-41	1.30485e-05	1.24799e-06	up	Gh_A09G1714	8.88036	29.2208	-1.65316	2.06637e-40	0.000230369	6.66364e-05	down	Gh_A05G3050	13.4929	4.12895	1.66988	7.05e-05	0.0338112	0.0120612	up
Gh_D05G0951	26.5334	5.81115	2.09066	1.13681e-41	5.69161e-05	7.39792e-06	up	Gh_D01G0937	10.3966	31.686	-1.6485	2.14213e-40	9.91789e-05	2.367e-05	down	Gh_D12G2362	13.4053	4.31922	1.66988	7.05e-05	0.0338112	0.0120612	up
Gh_A06G1308	567.751	93.6962	2.60213	1.54699e-40	7.68215e-52	4.95564e-84	up	Gh_D04G0855	16.8434	52.0553	-1.60347	3.68161e-42	5.00183e-07	3.38028e-08	down	Gh_A07G0981	24.3989	8.11615	1.63686	0.000269433	0.00124617	0.000193133	up
Gh_D10G1425	20.9383	4.39362	2.26608	6.26576e-42	0.000312023	4.0511e-05	up	Gh_A09G0789	182.791	459.588	-1.34779	3.7949e-38	1.27673e-18	1.07776e-38	down	Gh_A11G0734	17.2078	5.91096	1.64186	0.000225894	0.0107746	0.00289923	up
Gh_A02G0333	159.295	27.315	2.54652	7.22375e-41	9.03908e-30	2.84544e-42	up	Gh_A05G0194	5.1708	17.4845	-1.68829	2.8577e-40	0.00649136	0.00393373	down	Gh_A12G2365	365.793	127.072	1.66067	1.63e-11	9.48e-53	1.75e-66	up
Gh_D05G1637	505.404	78.8994	2.68221	3.12951e-40	1.01391e-52	2.59777e-87	up	Gh_A11G0918	4.73083	16.7444	-1.68829	2.8577e-40	0.00649136	0.00393373	down	Gh_D03G1590	14.5105	4.63075	1.67541	0.00282309	0.0208021	0.0064204	up
Gh_D02G0399	467.062	69.4232	2.7635	1.10976e-40	3.31484e-54	2.16512e-90	up	Gh_D12G1021	4.99583	16.6745	-1.68829	2.8577e-40	0.00649136	0.00393373	down	Gh_A01G1245	109.926	37.7849	1.67279	1.23e-06	2.79e-16	3.62e-20	up
Gh_A05G1989	37.3602	5.51949	2.53812	4.91511e-41	1.81177e-07	5.45639e-10	up	Gh_D09G0765	660.336	1493.16	-1.19665	4.48864e-41	3.16293e-15	1.20119e-24	down	Gh_D03G0364	28.5335	9.7982	1.65032	0.000275208	0.000270446	2.88e-05	up
Gh_D06G1636	503.742	72.2731	2.81248	1.09481e-40	8.34871e-56	4.16699e-93	up	Gh_D01G1933	15.7484	48.1115	-1.57401	3.75228e-42	2.1117e-06	2.15844e-07	down	Gh_D06G1599	16.0253	5.04306	1.67993	4.34e-05	0.0127297	0.00347428	up
Gh_A08G0937	834.897	112.816	2.89332	4.49802e-40	1.94395e-65	7.85889e-98	up	Gh_D06G1593	344.775	805.46	-1.24113	3.21328e-41	5.2488e-16	3.37566e-30	down	Gh_D07G1120	15.8079	5.04135	1.67993	4.34e-05	0.0127297	0.00347428	up
Gh_A07G0924	49.3558	7.41585	2.73222	4.80867e-41	5.29115e-10	2.84812e-14	up	Gh_D09G1818	9.89001	30.9037	-1.60341	1.26104e-39	0.000177207	5.257e-05	down	Gh_D11G0117	16.2806	5.21334	1.67993	4.34e-05	0.0127297	0.00347428	up
Gh_D08G1145	1313.65	157.673	3.06495	1.61282e-39	2.60593e-77	1.21477e-103	up	Gh_D06G2283	9.24635	27.663	-1.60341	7.05068e-39	0.0004098	0.000145814	down	Gh_A10G2355	32.4721	10.9948	1.67993	1.84e-08	7.02e-05	4.99e-06	up
Gh_D13G0015	12.4849	1.47857	3.06863	3.2952e-44	0.00558687	0.000286739	up	Gh_A12G0083	31.4132	86.7289	-1.49262	1.02471e-38	2.56114e-10	2.89304e-12	down	Gh_D01G2006	48.2286	16.9421	1.63686	5.16e-05	5.2e-07	1.26e-08	up
Gh_A08G0938	1066.25	107.369	3.32412	5.82261e-40	7.30965e-83	3.92958e-118	up	Gh_A06G0267	6.86084	21.9489	-1.6034	1.00541e-39	0.00218543	0.00112534	down	Gh_A13G1686	43.2266	14.5175	1.65873	4.66e-06	2.14e-06	6.83e-08	up
Gh_D08G1146	1671.36	146.346	3.52542	8.10024e-40	1.87874e-99	5.37396e-125	up	Gh_A08G2114	7.14173	22.369	-1.6034	1.00541e-39	0.00218543	0.00112534	down	Gh_A07G1096	34.6357	11.5867	1.68368	4.69e-05	2.5e-05	1.36e-06	up
Gh_A07G0003	29.7759	2.63169	3.13312	8.10618e-44	1.6158e-06	3.23993e-10	up	Gh_A12G0574	6.3039	18.6613	-1.6034	6.81522e-41	0.00498642	0.00313425	down	Gh_D01G1450	150.02	51.8973	1.66774	2.11e-07	4.11e-22	2.19e-27	up
Gh_D07G1560	25.0703	1.16994	4.0972	9.8129e-42	3.94225e-05	9.03717e-11	up	Gh_D10G2032	16.9277	50.0719	-1.54743	3.89965e-42	1.62491e-06	1.66471e-07	down	Gh_D13G2489	205.571	69.7474	1.69657	1.05e-07	6.56e-31	1.66e-38	up
Gh_D06G1593	9.01566	805.46	-6.40216	3.52915e-42	1.44047e-68	3.74504e-255	down	Gh_A08G2544	47.1415	124.807	-1.42068	2.65398e-39	3.32818e-13	2.44652e-16	down	Gh_A12G2357	19.1389	6.16027	1.68685	0.000178894	0.00483501	0.000989348	up
Gh_D11G0676	4.74108	457.239	-6.37351	2.87913e-42	1.40485e-42	2.38286e-211	down	Gh_D02G0304	338.504	772.379	-1.20605	1.04077e-38	3.42031e-15	7.27278e-29	down	Gh_D08G1276	19.1737	6.3887	1.68685	0.000178894	0.00483501	0.000989348	up
Gh_A06G1269	11.9304	677.108	-5.75619	3.65857e-40	2.38394e-70	2.82448e-233	down	Gh_A12G0179	37.0129	99.7973	-1.44101	2.3061e-38	3.6283e-11	2.27891e-13	down	Gh_A13G1197	39.5318	13.0868	1.68825	0.000237829	5.27e-06	1.92e-07	up
Gh_D06G1939	2.79991	124.857	-5.15475	2.01696e-41	2.59795e-18	7.37239e-64	down	Gh_A01G0577	10.424	29.8937	-1.55687	1.34342e-39	0.00031143	0.000113198	down	Gh_D12G1847	37.7171	12.5096	1.68685	6.33e-06	8.91e-06	3.68e-07	up
Gh_D03G1135	7.0388	208.058	-4.78853	3.91908e-42	3.62738e-33	1.94116e-101	down	Gh_D05G3506	9.94365	29.6737	-1.55687	1.34342e-39	0.00031143	0.000113198	down	Gh_A12G0793	25.4532	8.24646	1.69575	0.000245536	0.000653067	8e-05	up
Gh_D07G0317	0.77208	63.2297	-5.39402	4.01246e-44	7.97617e-09	8.43343e-33	down	Gh_A05G3844	17.1738	48.9168	-1.51857	4.02182e-42	2.84908e-06	3.61213e-07	down	Gh_A03G1621	35.558	11.7925	1.72432	3.5e-05	1.3e-05	5.4e-07	up
Gh_D10G2193	2.01207	78.1369	-4.96302	5.89173e-41	3.42029e-12	5.40974e-39	down	Gh_D01G0689	8.74531	27.4436	-1.55188	7.57986e-39	0.000720109	0.000312385	down	Gh_A04G0771	12.4852	3.79792	1.72432	0.00146882	0.0402631	0.0144474	up
Gh_D12G1398	0.837913	54.3986	-5.1735	2.33542e-42	3.959e-08	1.39958e-27	down	Gh_D01G1683	9.18751	26.6535	-1.55188	7.57986e-39	0.000720109	0.000312385	down	Gh_D06G0984	12.2633	3.67131	1.72432	0.00146882	0.0402631	0.0144474	up
Gh_A07G0261	0.954377	42.785	-4.84825	2.64369e-41	3.68413e-07	2.83134e-21	down	Gh_D13G0415	9.00553	27.0562	-1.55188	7.57986e-39	0.000720109	0.000312385	down	Gh_D07G0050	11.9056	3.91543	1.72432	0.00146882	0.0402631	0.0144474	up
Gh_A08G0954	0.529525	39.316	-4.70909	1.94305e-42	9.33726e-07	4.98189e-19	down	Gh_D07G1197	249.935	571.295	-1.21004	2.87967e-41	3.40234e-15	6.83129e-31	down	Gh_D07G2248	15.3113	4.89046	1.72432	0.000833048	0.015293	0.00417866	up
Gh_D06G0035	4.35854	82.3986	-4.18674	3.6846e-42	3.49728e-15	5.73702e-37	down	Gh_A03G0805	5.31953	16.0628	-1.6034	8.24309e-40	0.0114401	0.00865449	down	Gh_A11G0102	20.9982	6.7642	1.72432	0.000139764	0.00214769	0.000338096	up
Gh_A03G0901	13.5015	206.756	-3.8305	5.58453e-41	3.31619e-39	6.49922e-87	down	Gh_D01G0761	17.7772	49.956	-1.46726	1.2743e-39	3.85036e-06	5.82901e-07	down	Gh_A04G1093	50.4307	16.7473	1.69575	4.71e-05	1.37e-07	2.01e-09	up
Gh_A05G0320	1.70859	45.6062	-4.20751	6.46022e-42	1.07035e-08	7.39446e-21	down	Gh_D11G3277	7.61572	23.6109	-1.54569	4.01817e-42	0.00165884	0.000875361	down	Gh_D05G0685	50.2421	16.9869	1.69575	4.71e-05	1.37e-07	2.01e-09	up
Gh_D04G2024	2.53446	56.2583	-4.00311	2.91202e-40	7.83981e-11	1.8977e-24	down	Gh_D02G0869	90.1471	221.273	-1.31116	1.99411e-39	7.49704e-17	4.57959e-25	down	Gh_A05G3404	67.2906	21.8956	1.74602	9.61e-06	1.9e-10	4.49e-13	up
Gh_A13G1565	2.03813	37.9879	-3.93513	4.13548e-41	1.34873e-07	1.74942e-16	down	Gh_D10G1772	158.612	388.713	-1.30843	2.19365e-38	2.13324e-17	2.03954e-36	down	Gh_D02G0403	30.4337	9.80683	1.72432	1.12e-05	0.000101965	7.32e-06	up
Gh_D03G1026	41.2108	418.889	-3.33145	9.27756e-41	1.65459e-62	2.8035e-129	down	Gh_D05G0723	6.56777	20.8485	-1.53781	1.12276e-39	0.00383093	0.00243065	down	Gh_D05G1100	38.0353	12.1319	1.74343	3.7e-05	5.49e-06	1.76e-07	up
Gh_A12G0583	1.01147	23.824	-4.02001	2.14415e-42	6.01586e-05	1.0532e-10	down	Gh_D05G1322	7.29692	21.3394	-1.53781	1.12276e-39	0.00383093	0.00243065	down	Gh_D02G1724	18.4084	5.54434	1.72432	0.000198722	0.00578479	0.00119293	up
Gh_A12G1276	1.24929	24.4476	-4.02001	2.14415e-42	6.01586e-05	1.0532e-10	down	Gh_D07G1715	6.9011	20.9929	-1.53781	1.12276e-39	0.00383093	0.00243065	down	Gh_D11G2822	17.721	5.60618	1.72432	0.000198722	0.00578479	0.00119293	up
Gh_D05G1519	8.86008	96.0342	-3.33493	1.73963e-40	2.14522e-19	4.14783e-36	down	Gh_A08G0832	14.8206	43.3356	-1.50723	4.0616e-39	1.50462e-05	2.92355e-06	down	Gh_A02G1200	57.6744	18.5406	1.74941	3.34e-05	4.46e-09	2.32e-11	up
Gh_D13G1902	1.69878	32.9635	-3.73443	2.41065e-41	7.81413e-07	8.48072e-14	down	Gh_D02G2437	14.8863	42.6792	-1.50723	4.0616e-39	1.50462e-05	2.92355e-06	down	Gh_A12G1838	390.53	127.423	1.75415	0.00043195	1.21e-59	1.84e-76	up
Gh_A08G1444	2.4427	32.4013	-3.69071	2.45782e-41	1.1305e-06	2.89319e-13	down	Gh_A12G1287	6.03988	17.8174	-1.52745	9.96682e-40	0.00878928	0.00666615	down	Gh_D01G0291	23.8047	7.60141	1.72432	1.88e-05	0.000786136	9.54e-05	up
Gh_A06G0058	4.3561	50.0219	-3.47857	2.77767e-41	2.80988e-10	1.39865e-19	down	Gh_D11G2994	6.34332	17.9237	-1.52745	9.96682e-40	0.00878928	0.00666615	down	Gh_D11G0816	24.062	7.8202	1.72432	1.88e-05	0.000786136	9.54e-05	up
Gh_A09G1400	9.71004	97.6153	-3.22015	1.75767e-41	7.83118e-20	1.05715e-35	down	Gh_A10G1515	9.5051	28.7938	-1.50877	2.58678e-40	0.000554339	0.00024132	down	Gh_D07G2245	16.8419	5.10125	1.76739	3.8e-05	0.00688182	0.00142924	up
Gh_A05G1432	33.8088	289.733	-3.06661	3.99625e-41	2.62482e-51	7.32419e-95	down	Gh_A12G0226	12.2933	33.9969	-1.48313	4.58601e-42	0.00018376	6.62773e-05	down	Gh_D07G0523	14.1714	4.42681	1.77679	5.96e-05	0.0179762	0.00498505	up
Gh_D13G2489	7.19517	69.7474	-3.22298	8.57925e-41	2.59964e-14	1.60024e-25	down	Gh_A05G1329	21.4058	55.824	-1.41243	1.43913e-39	1.74617e-06	2.36232e-07	down	Gh_D10G1795	14.3173	4.08491	1.77679	5.96e-05	0.0179762	0.00498505	up
Gh_A01G1324	2.3188	30.1193	-3.59908	3.29868e-42	2.41747e-06	3.20064e-12	down	Gh_A03G0248	16.2073	44.826	-1.48188	1.3132e-39	1.15276e-05	2.21128e-06	down	Gh_A07G0383	91.4006	29.5696	1.74026	2.18e-05	4.28e-14	1.25e-17	up
Gh_A11G2095	8.19795	76.2433	-3.16026	5.16197e-41	1.70965e-15	3.25382e-27	down	Gh_D04G0047	9.37646	26.265	-1.49844	2.57662e-40	0.00126809	0.000668234	down	Gh_A12G0365	53.2647	17.0956	1.738	2.63e-06	2.97e-08	2.59e-10	up
Gh_A09G0482	6.08529	56.6657	-3.13534	3.41205e-41	9.8946e-12	2.72081e-20	down	Gh_D13G1806	8.95435	25.926	-1.49844	2.57662e-40	0.00126809	0.000668234	down	Gh_D01G0978	37.2505	11.7247	1.76385	3.29e-05	6.61e-06	2.11e-07	up
Gh_D01G0592	12.8456	111.266	-3.0365	1.77115e-40	2.47209e-22	2.92858e-38	down	Gh_D13G2389	14.1281	39.4571	-1.46427	7.88925e-39	6.1021e-05	1.78835e-05	down	Gh_D04G1199	36.5721	11.8293	1.76385	3.29e-05	6.61e-06	2.11e-07	up
Gh_D04G1954	1.06333	19.9029	-3.76285	1.57266e-41	0.000231595	1.44085e-08	down	Gh_D12G2601	52.0731	128.83	-1.32158	5.24026e-38	2.85297e-12	3.96373e-15	down	Gh_A01G0280	20.0021	6.10755	1.76085	0.000159727	0.00256913	0.000405981	up
Gh_A02G1200	1.25822	18.5406	-3.6907	2.66822e-42	0.000332574	4.88432e-08	down	Gh_D03G1194	10.8916	30.5453	-1.47217	2.71546e-40	0.000422998	0.000182255	down	Gh_D05G3846	180.404	57.4373	1.78572	9.12e-07	1.41e-28	4.65e-36	up
Gh_A08G1834	5.38762	49.5884	-3.18906	4.55919e-41	2.31384e-10	4.03511e-18	down	Gh_A03G0901	88.374	206.756	-1.24906	2.92086e-38	3.35735e-15	6.57443e-22	down	Gh_A05G1223	142.721	46.2578	1.76007	2.46e-07	2.2e-22	4.2e-28	up
Gh_D02G2031	21.6676	166.581	-2.88715	3.49668e-41	1.56408e-32	1.44743e-54	down	Gh_D12G0180	27.0216	69.6241	-1.37677	5.89559e-42	1.12805e-07	8.37645e-09	down	Gh_A09G1398	43.1861	13.9005	1.75827	4.68e-06	8.23e-07	1.58e-08	up
Gh_D07G0841	3.94581	40.6611	-3.19539	4.22765e-41	1.3791e-08	6.33439e-15	down	Gh_A04G0619	25.588	67.1833	-1.36746	5.64978e-39	2.59328e-07	2.4177e-08	down	Gh_D01G0608	39.3261	12.3047	1.78091	3.5e-05	2.81e-06	6.91e-08	up
Gh_D05G2756	1.2769	17.5302	-3.61475	9.84185e-41	0.000488264	1.61718e-07	down	Gh_A06G0058	18.6675	50.0219	-1.39131	1.42208e-39	8.89435e-06	1.90594e-06	down	Gh_A11G2344	85.2148	27.1157	1.76739	5.35e-06	2.16e-13	7.95e-17	up
Gh_D05G1605	49.6378	312.672	-2.62696	6.11245e-43	4.11267e-48	2.28295e-84	down	Gh_A13G1531	5.06957	15.0323	-1.5132	1.02774e-39	0.019955	0.0183423	down	Gh_D13G2124	129.14	41.319	1.77555	6.07e-10	2.24e-20	1.19e-25	up
Gh_D09G0489	8.60193	65.15	-2.7758	6.75966e-41	5.36784e-13	1.79722e-20	down	Gh_D01G2338	4.6637	14.8414	-1.5132	1.02774e-39	0.019955	0.0183423	down	Gh_A04G1459	32.6144	10.4871	1.79144	0.000250661	2.24e-05	9.29e-07	up
Gh_A12G1108	0.702068	15.9987	-3.44969	4.51908e-44	0.00107401	1.71738e-06	down	Gh_A11G1456	19.928	51.7288	-1.3752	2.39028e-38	6.8559e-06	1.39361e-06	down	Gh_D05G1605	1098.88	312.672	1.95064	1.18e-07	4.74e-130	3.55e-248	up
Gh_A13G1960	2.3509	22.3889	-3.16019	2.75232e-41	7.07946e-05	4.23415e-08	down	Gh_D13G2157	130.627	297.388	-1.19797	2.9197e-39	1.98398e-15	1.02927e-27	down	Gh_D03G1150	204.834	65.2097	1.78541	1.52e-06	1.57e-32	4.54e-41	up
Gh_A01G1126	23.5576	144.933	-2.56092	1.39898e-40	3.76168e-27	1.06356e-41	down	Gh_D03G1490	8.81564	25.2648	-1.44294	8.97966e-39	0.00223014	0.00139034	down	Gh_A11G2691	44.5912	14.3764	1.77323	5.92e-05	3.47e-07	5.13e-09	up
Gh_D06G1400	69.744	395.084	-2.48112	3.36967e-41	3.93589e-47	3.88943e-89	down	Gh_D04G0620	8.59591	25.3236	-1.44294	8.97966e-39	0.00223014	0.00139034	down	Gh_A07G0765	10.8516	3.45185	1.79144	0.000100431	0.0481907	0.0173455	up
Gh_D05G2757	1.49034	15.3528	-3.3595	7.62132e-41	0.00161333	5.63747e-06	down	Gh_D11G2913	9.41459	25.4353	-1.44294	8.97966e-39	0.00223014	0.00139034	down	Gh_A09G0818	11.2527	3.44572	1.79144	0.000100431	0.0481907	0.0173455	up
Gh_A11G2469	10.3069	65.0846	-2.63141	7.81562e-41	9.58289e-13	2.44571e-19	down	Gh_A07G1512	12.5276	35.0425	-1.41332	4.87941e-42	0.000243053	0.000103308	down	Gh_D06G0407	10.9014	3.02296	1.79144	0.000100431	0.0481907	0.0173455	up
Gh_D08G1076	4.76802	38.161	-2.79763	1.04366e-40	7.51817e-08	3.46155e-12	down	Gh_A08G2217	13.2612	35.0501	-1.41332	4.87941e-42	0.000243053	0.000103308	down	Gh_D07G1781	10.8361	3.03304	1.79144	0.000100431	0.0481907	0.0173455	up
Gh_D05G3846	8.75503	57.4373	-2.58786	1.86473e-40	3.61183e-11	1.11074e-16	down	Gh_D08G0319	12.8982	34.7915	-1.41332	4.87941e-42	0.000243053	0.000103308	down	Gh_D13G1493	68.113	21.2508	1.80056	7.93e-06	6.01e-11	7.98e-14	up
Gh_D13G1806	2.50471	25.926	-2.91083	4.19174e-41	1.30841e-05	8.81138e-09	down	Gh_D13G1102	13.2419	35.4095	-1.41332	4.87941e-42	0.000243053	0.000103308	down	Gh_D06G0035	261.297	82.3986	1.80094	3.69e-07	1.04e-41	6.14e-53	up
Gh_A12G1464	2.16323	20.4705	-3.02589	2.76667e-41	0.000176044	4.01126e-07	down	Gh_D10G1845	103.279	234.504	-1.20597	6.10303e-39	4.49359e-15	2.97042e-23	down	Gh_A06G1622	718.747	217.79	1.86074	3.72e-08	2.2e-102	1.58e-152	up
Gh_A05G3321	0.509144	14.4329	-3.26328	7.60562e-41	0.00248188	1.79649e-05	down	Gh_D12G0974	31.5251	80.1869	-1.32719	2.27897e-39	2.9819e-08	1.68758e-09	down	Gh_D03G0321	35.6565	11.4621	1.78572	0.000103041	7.96e-06	2.53e-07	up
Gh_A12G2298	5.24583	37.2242	-2.75966	7.62554e-42	1.25535e-07	1.04545e-11	down	Gh_A01G1324	10.9644	30.1193	-1.42563	2.91117e-40	0.000733301	0.000377824	down	Gh_D10G1124	273.867	85.101	1.81953	5.4e-08	3.11e-44	2.44e-56	up
Gh_D11G1446	4.41662	31.4358	-2.79762	6.95511e-42	1.61707e-06	5.45023e-10	down	Gh_D05G0119	10.6965	30.4729	-1.42563	2.91117e-40	0.000733301	0.000377824	down	Gh_D06G1400	1347.34	395.084	1.90652	3.64e-05	8.33e-139	2.9e-295	up
Gh_D05G1184	6.32054	39.4994	-2.59361	8.21719e-42	7.9396e-08	1.55362e-11	down	Gh_D03G1321	17.6653	46.1119	-1.34819	1.46316e-39	3.56438e-05	1.08678e-05	down	Gh_A12G0144	21.7221	6.63535	1.79144	0.000123416	0.00112973	0.000136881	up
Gh_D08G2192	6.0355	39.1108	-2.59361	8.21719e-42	7.9396e-08	1.55362e-11	down	Gh_D12G2100	7.94187	21.9304	-1.42283	4.93148e-42	0.00506475	0.00382475	down	Gh_D01G1469	63.5978	19.699	1.81743	1.1e-05	2.05e-10	3.53e-13	up
Gh_D12G0977	7.16144	43.8967	-2.55912	2.13856e-41	1.06462e-08	8.77052e-13	down	Gh_D12G1452	36.4548	87.6145	-1.29647	9.16168e-38	1.06381e-08	4.48968e-10	down	Gh_D04G1954	64.3048	19.9029	1.81743	1.1e-05	2.05e-10	3.53e-13	up
Gh_A05G0759	2.49787	19.4034	-2.95374	8.60226e-42	0.000282946	1.23973e-06	down	Gh_D09G1751	13.9576	36.948	-1.3893	1.51673e-39	0.000185101	7.64822e-05	down	Gh_D13G2355	40.2318	12.441	1.81743	3.32e-05	1.45e-06	2.67e-08	up
Gh_D03G1283	2.32747	19.0365	-2.95374	8.60226e-42	0.000282946	1.23973e-06	down	Gh_A06G0622	10.2702	27.4975	-1.40749	1.68017e-39	0.00168511	0.00103984	down	Gh_D02G1652	84.3446	26.1617	1.80376	5.59e-06	1.61e-13	4.37e-17	up
Gh_D05G1551	2.0026	19.4979	-2.95374	8.60226e-42	0.000282946	1.23973e-06	down	Gh_A01G0074	41.65	101.855	-1.28887	1.27953e-39	8.38853e-10	1.55986e-11	down	Gh_D11G2086	15.7249	4.79258	1.81743	0.000725978	0.00819834	0.00169375	up
Gh_D11G1693	2.30935	19.2625	-2.95374	8.60226e-42	0.000282946	1.23973e-06	down	Gh_D05G2161	6.23331	17.0136	-1.44728	2.36961e-39	0.015119	0.0139329	down	Gh_A10G1843	46.1541	14.0619	1.80494	5.65e-05	1.78e-07	1.96e-09	up
Gh_A01G1279	36.1938	180.77	-2.30515	7.19052e-40	8.96657e-31	1.17701e-45	down	Gh_D08G0240	5.61153	16.7597	-1.44728	2.36961e-39	0.015119	0.0139329	down	Gh_A05G3111	18.9955	5.83141	1.80233	0.00017705	0.00306632	0.000481449	up
Gh_A02G0258	1.43595	12.7766	-3.16019	1.45708e-41	0.00383619	5.69479e-05	down	Gh_D12G2230	5.63252	16.6897	-1.44728	2.36961e-39	0.015119	0.0139329	down	Gh_A12G0827	80.6144	25.3803	1.80679	6.15e-06	4.54e-13	1.61e-16	up
Gh_A11G1370	0.900855	12.5295	-3.16019	1.45708e-41	0.00383619	5.69479e-05	down	Gh_D11G1967	23.4353	56.6489	-1.30942	1.74446e-39	5.15379e-06	1.0799e-06	down	Gh_D02G1282	364.857	113.823	1.81819	1.54e-07	2.82e-58	5.35e-75	up
Gh_D11G1967	9.81735	56.6489	-2.44347	1.63281e-40	7.42101e-11	1.21942e-15	down	Gh_A01G0158	12.7074	33.5842	-1.37209	5.16633e-42	0.000423395	0.000206242	down	Gh_A05G3615	17.9009	5.14448	1.84985	3.36e-05	0.00366528	0.000562543	up
Gh_A05G0145	1.58584	18.1787	-2.87779	3.62453e-42	0.000463912	3.80041e-06	down	Gh_D08G2303	13.0334	33.9573	-1.37209	5.16633e-42	0.000423395	0.000206242	down	Gh_D03G1635	12.7457	3.77503	1.8398	0.00123651	0.0213899	0.00582601	up
Gh_A05G3831	1.54078	18.1194	-2.87779	3.62453e-42	0.000463912	3.80041e-06	down	Gh_A13G0157	7.28653	18.7995	-1.39695	2.62122e-40	0.0116168	0.0104605	down	Gh_D07G0834	27.3898	8.27371	1.80679	0.000204285	0.000176385	1.25e-05	up
Gh_A08G1296	14.8554	80.8208	-2.38488	2.91123e-40	5.60034e-15	1.59129e-21	down	Gh_D02G0973	7.11046	18.8745	-1.39695	2.62122e-40	0.0116168	0.0104605	down	Gh_D08G0790	22.5143	6.79148	1.82386	0.000574641	0.000813564	8.59e-05	up
Gh_D12G0974	14.8253	80.1869	-2.36707	1.57867e-41	9.77914e-15	4.43565e-21	down	Gh_A11G0065	14.9025	39.2095	-1.36805	4.83892e-39	0.000139847	5.62234e-05	down	Gh_A12G0504	988.164	275.191	1.98131	4.35e-07	5.39e-129	1.33e-227	up
Gh_D12G2434	21.0612	105.163	-2.28529	4.8781e-43	1.10115e-18	1.63654e-26	down	Gh_D04G1368	14.8034	38.5506	-1.36805	4.83892e-39	0.000139847	5.62234e-05	down	Gh_D01G0424	53.4163	16.4026	1.82289	2.64e-06	1.12e-08	5.55e-11	up
Gh_D13G0836	3.83952	28.1309	-2.65323	7.59733e-42	7.72963e-06	1.3957e-08	down	Gh_A13G1604	43.0245	102.715	-1.26933	1.00579e-38	1.10788e-09	2.20765e-11	down	Gh_D12G0159	53.6972	16.4038	1.84985	2.57e-06	5.77e-09	2.12e-11	up
Gh_A12G0237	5.89411	34.567	-2.43958	2.1736e-41	6.95166e-07	1.06149e-09	down	Gh_D05G0131	43.8902	105.076	-1.26417	1.04621e-41	8.71329e-10	1.58466e-11	down	Gh_A13G0328	26.1806	7.56027	1.8398	2.91e-05	0.0002108	1.47e-05	up
Gh_D04G1363	116.357	497.105	-2.08686	1.31214e-40	1.43965e-36	4.73038e-74	down	Gh_A06G1779	18.0493	45.0504	-1.31682	1.64506e-38	6.08739e-05	2.18387e-05	down	Gh_A10G1925	15.1333	4.1778	1.87633	4.99e-05	0.00972352	0.00196496	up
Gh_D04G0293	0.593006	11.6605	-3.04916	5.04618e-41	0.00598685	0.000179312	down	Gh_D01G2180	55.924	127.692	-1.20443	4.05746e-39	1.05466e-10	5.22877e-13	down	Gh_A12G2182	15.1678	4.2344	1.87633	4.99e-05	0.00972352	0.00196496	up
Gh_D05G3291	1.35726	11.7121	-3.04916	5.04618e-41	0.00598685	0.000179312	down	Gh_A09G1803	19.1068	47.1579	-1.30294	1.58462e-39	4.64131e-05	1.59032e-05	down	Gh_D09G0421	15.0993	4.34916	1.87633	4.99e-05	0.00972352	0.00196496	up
Gh_D11G1706	0.665797	12.3819	-3.04916	5.04618e-41	0.00598685	0.000179312	down	Gh_D04G1926	67.6632	152.341	-1.17383	2.76764e-38	1.20855e-11	8.30094e-15	down	Gh_D10G0852	15.2609	4.00722	1.87633	4.99e-05	0.00972352	0.00196496	up
Gh_D13G2355	0.971422	12.441	-3.04916	5.04618e-41	0.00598685	0.000179312	down	Gh_A13G0170	22.8356	55.6319	-1.28411	1.79978e-39	8.75566e-06	2.14169e-06	down	Gh_A05G1432	1088.88	289.733	2.04762	2.77e-07	1.15e-138	1.1e-261	up
Gh_D11G2500	26.438	122.049	-2.19928	1.90205e-40	6.56352e-21	2.08302e-29	down	Gh_A10G0483	24.7053	60.6491	-1.28863	6.22638e-42	2.9725e-06	5.60744e-07	down	Gh_A11G2550	49.5361	14.8892	1.86183	8.88e-05	2.75e-08	1.47e-10	up
Gh_A07G1461	3.67852	27.1861	-2.6017	7.80936e-42	1.31661e-05	4.07651e-08	down	Gh_D10G1431	93.6391	207.064	-1.15438	2.62829e-39	2.00268e-13	2.16753e-19	down	Gh_D13G2550	162.67	48.8305	1.87338	5.63e-06	3.32e-27	8.28e-35	up
Gh_D13G0415	3.52633	27.0562	-2.6017	7.80936e-42	1.31661e-05	4.07651e-08	down	Gh_D01G1586	23.7985	58.1054	-1.27418	1.08759e-38	6.7289e-06	1.54757e-06	down	Gh_D04G2024	190.543	56.2583	1.89283	6.48e-05	4.01e-32	3.03e-41	up
Gh_D09G1404	35.7472	164.271	-2.16307	2.3823e-40	6.75683e-27	1.73021e-38	down	Gh_A08G1267	30.0351	72.2453	-1.26776	1.36979e-37	4.44952e-07	5.37076e-08	down	Gh_A09G1975	16.5647	4.5603	1.9049	0.000641907	0.00435431	0.000654797	up
Gh_A04G1093	1.97957	16.7473	-2.79762	5.11462e-41	0.00075955	1.13584e-05	down	Gh_D07G0821	30.8455	73.8884	-1.26049	1.39316e-38	3.45101e-07	3.81736e-08	down	Gh_D05G2704	16.781	4.76103	1.9049	0.000641907	0.00435431	0.000654797	up
Gh_D05G0685	1.65709	16.9869	-2.79762	5.11462e-41	0.00075955	1.13584e-05	down	Gh_A05G2165	8.08789	20.5829	-1.35724	5.57669e-42	0.00879668	0.00769375	down	Gh_D10G1613	17.325	4.65295	1.9049	0.000641907	0.00435431	0.000654797	up
Gh_A05G3949	236.116	931.513	-1.97077	8.32421e-41	2.06437e-35	1.38302e-63	down	Gh_A07G0667	12.3481	30.9983	-1.35188	1.392e-40	0.000965493	0.000566068	down	Gh_D11G0146	16.6272	4.98435	1.9049	0.000641907	0.00435431	0.000654797	up
Gh_D01G2015	5.14934	30.5594	-2.50812	1.69747e-40	2.99364e-06	6.72241e-09	down	Gh_A09G2421	12.3089	31.2234	-1.35188	1.392e-40	0.000965493	0.000566068	down	Gh_D08G1570	30.1063	8.74049	1.87633	1.14e-05	3.91e-05	1.54e-06	up
Gh_A04G0863	199.68	797.128	-1.98362	5.95686e-40	1.93168e-35	1.95225e-66	down	Gh_A06G0816	12.5458	33.2033	-1.32966	7.18866e-40	0.000725262	0.00041113	down	Gh_A03G1396	11.9498	3.33723	1.91697	8.38e-05	0.0256153	0.0067725	up
Gh_A12G1554	30.5468	140.893	-2.1581	2.26355e-40	1.48235e-23	4.02202e-33	down	Gh_D10G2574	13.1753	33.3917	-1.32966	7.18866e-40	0.000725262	0.00041113	down	Gh_A11G0060	32.2795	9.39745	1.89143	0.00014023	1.67e-05	4.92e-07	up
Gh_D01G1541	3.51352	25.7695	-2.54826	6.13892e-41	2.31497e-05	1.17376e-07	down	Gh_A09G1914	15.4248	37.7122	-1.33106	5.09139e-39	0.000241336	0.000111708	down	Gh_A02G0453	18.6744	5.08641	1.92786	3.01e-05	0.00192391	0.000218698	up
Gh_A10G1465	24.5111	112.578	-2.14463	6.01319e-43	4.6299e-19	2.09452e-26	down	Gh_A05G2578	16.508	42.8937	-1.33214	5.05503e-39	8.03435e-05	2.99545e-05	down	Gh_D05G1738	21.8722	6.39391	1.89835	0.000128221	0.000702372	6.24e-05	up
Gh_A11G1803	5.1844	30.3579	-2.46157	2.20572e-43	5.14138e-06	1.88326e-08	down	Gh_D10G1429	125.522	267.867	-1.10575	4.51259e-38	2.36144e-13	1.53091e-22	down	Gh_D11G2013	33.6406	9.65767	1.9049	8.6e-06	7.1e-06	1.57e-07	up
Gh_D01G0450	2.41271	16.2157	-2.71273	8.72177e-44	0.0012731	3.36699e-05	down	Gh_D04G1081	71.9746	158.674	-1.15676	1.69741e-41	9.99031e-12	3.99898e-15	down	Gh_A11G1298	104.482	30.1885	1.90906	8.14e-07	1.07e-17	8.96e-23	up
Gh_A07G1489	3.95275	25.1927	-2.49277	6.30793e-41	3.96747e-05	3.26206e-07	down	Gh_D08G1556	31.5544	76.2761	-1.25363	2.54278e-39	2.62311e-07	2.74148e-08	down	Gh_A04G0377	605.068	167.09	1.99198	4.76e-08	2.93e-98	2.96e-140	up
Gh_A02G0236	180.731	686.962	-1.91323	4.48599e-40	7.79274e-33	9.77097e-64	down	Gh_A13G1624	18.7714	46.0397	-1.27224	1.6493e-39	7.82621e-05	3.0926e-05	down	Gh_D05G0341	24.2595	6.84311	1.91697	0.000103495	0.00030371	2.02e-05	up
Gh_D05G1711	5.16401	28.7444	-2.41348	7.37359e-41	9.10079e-06	5.29491e-08	down	Gh_D04G1957	40.3921	93.6942	-1.24112	1.01205e-41	1.10144e-08	4.60702e-10	down	Gh_A01G2000	13.793	3.60631	1.94672	0.00106422	0.0115791	0.00227961	up
Gh_D01G0423	3.3727	19.7609	-2.54046	6.17764e-42	0.000288006	5.72395e-06	down	Gh_D12G1686	359.687	716.081	-1.01074	6.40991e-39	6.54584e-11	5.92131e-21	down	Gh_A10G0099	13.7715	3.81856	1.94672	0.00106422	0.0115791	0.00227961	up
Gh_D07G1927	13.6471	65.3622	-2.16575	4.67644e-40	2.29717e-11	1.92981e-15	down	Gh_A08G2542	27.0875	64.4149	-1.24842	2.17766e-39	2.91113e-06	5.67728e-07	down	Gh_D12G1188	14.131	3.76016	1.94672	0.00106422	0.0115791	0.00227961	up
Gh_A03G1211	19.485	83.7783	-2.10584	8.8726e-40	3.28171e-14	3.17094e-19	down	Gh_A05G0671	13.6121	34.5481	-1.31022	1.69617e-39	0.000551352	0.000302165	down	Gh_D10G1195	116.63	33.0091	1.94364	2.24e-06	2.96e-20	3.16e-26	up
Gh_A05G1145	3.86397	23.7116	-2.43505	8.50851e-42	6.87025e-05	9.19936e-07	down	Gh_D09G2194	19.7789	48.3043	-1.26085	2.75931e-38	5.93212e-05	2.23901e-05	down	Gh_D12G0517	1984.07	487.597	2.16187	0.00205442	1.56e-212	0	up
Gh_D04G1662	4.33151	24.0683	-2.43505	8.50851e-42	6.87025e-05	9.19936e-07	down	Gh_D10G0954	20.4249	47.5054	-1.26085	2.75931e-38	5.93212e-05	2.23901e-05	down	Gh_D04G1710	123.454	34.7088	1.95259	2.35e-06	2.14e-21	9.79e-28	up
Gh_D06G1991	41.7352	168.849	-1.98675	9.23865e-41	1.79355e-25	1.5956e-35	down	Gh_A01G0388	10.718	27.905	-1.32777	3.4094e-40	0.0022132	0.00153132	down	Gh_A13G0294	145.119	41.4126	1.94423	4.74e-10	4.12e-25	1.64e-32	up
Gh_D05G1190	26.0878	108.588	-2.03735	2.88123e-41	1.11801e-17	7.3141e-24	down	Gh_A10G1534	31.5407	75.4439	-1.23464	2.61105e-39	4.41092e-07	5.37856e-08	down	Gh_A10G1904	35.1326	9.59727	1.94672	1.57e-05	3.62e-06	5.86e-08	up
Gh_D12G1850	19.354	82.2854	-2.07128	3.19315e-40	1.07994e-13	2.16309e-18	down	Gh_A04G1436	9.02046	22.5762	-1.3251	3.47343e-40	0.00662208	0.00562509	down	Gh_A11G0263	39.4546	10.8244	1.96533	1.18e-08	6.55e-07	5.94e-09	up
Gh_A02G1074	2.30047	14.572	-2.62253	3.78556e-42	0.00213912	9.9403e-05	down	Gh_D09G0001	8.64251	23.0193	-1.3251	3.47343e-40	0.00662208	0.00562509	down	Gh_D05G1029	23.4397	6.46874	1.96248	0.000117681	0.000362892	2.34e-05	up
Gh_D08G0432	2.45954	15.1566	-2.62253	3.78556e-42	0.00213912	9.9403e-05	down	Gh_D13G1234	9.04328	23.381	-1.3251	3.47343e-40	0.00662208	0.00562509	down	Gh_A03G1274	18.4647	4.58774	1.98736	0.000574374	0.00229919	0.000250716	up
Gh_A11G1298	5.99247	30.1885	-2.22056	2.54839e-41	1.18424e-05	1.61926e-07	down	Gh_D02G1979	17.4331	41.9144	-1.29858	5.293e-39	0.000137263	5.96083e-05	down	Gh_A09G0775	18.3681	4.57866	1.98736	0.000574374	0.00229919	0.000250716	up
Gh_A05G3807	5.13458	27.6345	-2.36372	2.40135e-41	1.61015e-05	1.46685e-07	down	Gh_A08G0467	20.8201	49.9237	-1.25044	1.80832e-39	4.49723e-05	1.6172e-05	down	Gh_A10G1589	19598.7	3995.31	2.4311	1.11e-09	3.23e-300	0	up
Gh_A09G0334	5.11993	27.9705	-2.36372	2.40135e-41	1.61015e-05	1.46685e-07	down	Gh_A10G0474	6.67003	17.6912	-1.321	1.70296e-39	0.0198707	0.0207448	down	Gh_A03G0389	53.8472	14.5756	1.98736	2.93e-06	1.34e-09	1.66e-12	up
Gh_A08G0316	9.92131	45.7687	-2.13712	8.68012e-41	3.93627e-08	7.90158e-11	down	Gh_D05G0116	7.14924	18.4407	-1.321	1.70296e-39	0.0198707	0.0207448	down	Gh_A06G0058	181.782	50.0219	1.98894	1.49e-07	3.48e-32	5.04e-42	up
Gh_D08G1960	21.2615	87.8942	-2.03172	2.58382e-41	2.073e-14	3.05335e-19	down	Gh_A08G1294	66.6803	145.672	-1.13708	1.65797e-38	8.36598e-11	1.56035e-13	down	Gh_D04G1398	315.93	89.4728	1.95931	3.73e-08	8.66e-55	1.25e-71	up
Gh_A04G0349	14.3021	61.3969	-2.07483	4.56235e-43	2.34429e-10	9.18122e-14	down	Gh_A02G0462	6.41573	16.1104	-1.36239	1.24483e-40	0.0263104	0.0280706	down	Gh_A05G0855	85.4982	23.2588	1.99416	1.42e-05	4.3e-15	1.06e-19	up
Gh_A08G2483	5.12677	27.2216	-2.31219	6.00134e-41	2.87415e-05	3.87157e-07	down	Gh_A03G0731	12.3978	30.4485	-1.30533	3.51652e-39	0.00165614	0.00111808	down	Gh_D09G1857	67.7508	18.2334	2.01737	8.25e-06	3.22e-12	5.08e-16	up
Gh_D11G1389	13.3679	56.205	-2.05558	8.66506e-40	1.75198e-09	1.62809e-12	down	Gh_A13G1350	12.0579	29.6278	-1.30533	3.51652e-39	0.00165614	0.00111808	down	Gh_D02G0505	10.5528	2.71794	2.01383	0.00196378	0.0303515	0.00777373	up
Gh_D12G2433	11.7164	52.2526	-2.06068	7.15354e-40	7.44821e-09	1.11445e-11	down	Gh_D07G0745	12.0654	30.1392	-1.30533	3.51652e-39	0.00165614	0.00111808	down	Gh_D12G2632	11.2786	2.98324	2.01383	0.00196378	0.0303515	0.00777373	up
Gh_A12G2296	9.97772	43.5991	-2.07369	3.77934e-41	1.26514e-07	5.42868e-10	down	Gh_A09G2185	21.9757	52.098	-1.2409	6.01139e-39	3.39978e-05	1.15611e-05	down	Gh_A12G0245	74.3503	19.9791	2.02689	8.12e-06	2.39e-13	1.58e-17	up
Gh_A05G3404	4.1567	21.8956	-2.31219	1.26053e-40	0.00020669	6.9809e-06	down	Gh_A09G1232	20.495	46.8823	-1.23079	2.87428e-38	9.91673e-05	4.30929e-05	down	Gh_A08G2167	135.672	36.1826	2.037	3.08e-07	1.38e-24	2.24e-32	up
Gh_A03G0291	2.67869	17.7109	-2.39236	8.98931e-41	0.000859732	4.49512e-05	down	Gh_D05G1687	19.0623	44.5029	-1.24087	7.40206e-40	0.000132752	6.04071e-05	down	Gh_A12G2409	34.9069	9.32228	2.02072	0.000128663	2.23e-06	2.43e-08	up
Gh_D12G0779	2.71937	18.1973	-2.39236	8.98931e-41	0.000859732	4.49512e-05	down	Gh_D10G1490	19.4179	45.2868	-1.24087	7.40206e-40	0.000132752	6.04071e-05	down	Gh_D06G1948	16.9831	4.05006	2.0569	3.92e-05	0.00273402	0.000284124	up
Gh_A05G3787	2.18736	14.3408	-2.52632	5.45152e-41	0.00363012	0.000277327	down	Gh_A05G0098	10.0526	25.3964	-1.29855	2.02867e-39	0.00498642	0.00410681	down	Gh_A05G3321	54.5334	14.4329	2.04956	0.000129154	5.89e-10	4e-13	up
Gh_D11G0486	1.52571	14.1427	-2.52632	5.45152e-41	0.00363012	0.000277327	down	Gh_A09G2237	10.4123	25.0052	-1.29855	2.02867e-39	0.00498642	0.00410681	down	Gh_A07G2036	73250.8	10092.7	2.99605	2.97e-09	0	0	up
Gh_A10G0238	4.51288	25.6447	-2.25875	8.28074e-41	5.07026e-05	1.05718e-06	down	Gh_D10G0380	10.3758	24.9723	-1.29855	2.02867e-39	0.00498642	0.00410681	down	Gh_A08G0560	14.9766	3.7378	2.04625	0.000905385	0.00616566	0.000858173	up
Gh_A04G0623	88.9612	307.811	-1.77754	6.5784e-41	2.35911e-29	3.60961e-49	down	Gh_A08G2018	36.0304	81.3974	-1.17754	1.09585e-37	4.23436e-07	5.10917e-08	down	Gh_D03G0757	14.6095	3.99166	2.04625	0.000905385	0.00616566	0.000858173	up
Gh_D10G0217	5.624	27.9075	-2.12272	6.70248e-41	3.8543e-05	1.10554e-06	down	Gh_D01G0652	14.2501	34.4426	-1.269	1.80436e-39	0.000936027	0.000589985	down	Gh_A04G0592	42.5191	11.2782	2.02519	0.000210942	1.02e-07	4.04e-10	up
Gh_D13G1668	58.3735	202.449	-1.78277	7.59218e-40	1.21942e-25	4.22091e-36	down	Gh_D11G1527	14.0461	34.0356	-1.269	1.80436e-39	0.000936027	0.000589985	down	Gh_D11G0283	19.2496	4.82992	2.06536	0.000519368	0.00121204	9.21e-05	up
Gh_A12G1526	4.71819	25.0002	-2.20326	2.66364e-41	8.88622e-05	2.83391e-06	down	Gh_D12G2521	13.8489	34.1822	-1.269	1.80436e-39	0.000936027	0.000589985	down	Gh_D12G0236	211.346	55.6623	2.0531	1.64e-06	2.19e-38	9.15e-51	up
Gh_D05G2500	6.15781	27.1227	-2.07119	2.87806e-41	6.86282e-05	2.87022e-06	down	Gh_D02G0467	20.819	49.1619	-1.22159	1.88092e-39	7.49e-05	3.0926e-05	down	Gh_D06G1991	666.169	168.849	2.11767	4.84e-07	3.94e-112	7.37e-167	up
Gh_D01G0723	15.1369	60.2327	-1.95497	6.00719e-40	1.06591e-09	1.45195e-12	down	Gh_D07G1177	26.3586	60.2983	-1.20948	7.20484e-42	1.08455e-05	2.96695e-06	down	Gh_A07G0826	32.4645	8.27143	2.0519	0.000147366	6.36e-06	8.61e-08	up
Gh_D11G0725	4.15592	21.2061	-2.2466	1.31861e-40	0.000363564	1.87173e-05	down	Gh_A03G0396	8.33813	19.6459	-1.28853	6.39393e-42	0.0148359	0.0150432	down	Gh_D02G1413	49.1811	12.6641	2.05363	3.68e-06	5.55e-09	7.75e-12	up
Gh_D12G0236	14.0752	55.6623	-1.95249	5.75463e-40	4.54691e-09	9.85186e-12	down	Gh_A08G0398	7.99454	19.6931	-1.28853	6.39393e-42	0.0148359	0.0150432	down	Gh_A05G1008	285.436	72.9556	2.10435	3.29e-07	7.61e-53	9.53e-71	up
Gh_A06G1539	19.115	72.21	-1.88483	2.31876e-39	3.90762e-11	2.55319e-14	down	Gh_D01G2064	8.27032	20.1146	-1.28853	6.39393e-42	0.0148359	0.0150432	down	Gh_A06G1545	48.2381	12.1595	2.08047	2.27e-05	6.71e-09	8.67e-12	up
Gh_A01G2025	2.27467	12.7284	-2.42322	4.04712e-42	0.0061379	0.000759657	down	Gh_D04G1954	8.3814	19.9029	-1.28853	6.39393e-42	0.0148359	0.0150432	down	Gh_D09G1776	103.928	26.5017	2.08491	4.36e-06	3.42e-19	1.7e-25	up
Gh_A11G2604	1.52453	13.0166	-2.42322	4.04712e-42	0.0061379	0.000759657	down	Gh_D10G0045	8.44495	19.7791	-1.28853	6.39393e-42	0.0148359	0.0150432	down	Gh_A01G0186	73.8889	18.7748	2.10089	2.05e-05	9.23e-14	2.49e-18	up
Gh_D02G0504	2.07929	13.1991	-2.42322	4.04712e-42	0.0061379	0.000759657	down	Gh_A10G0594	16.6704	40.7359	-1.26423	5.55842e-39	0.000234346	0.000115061	down	Gh_A04G0242	23.1814	5.53674	2.07796	0.000119896	0.000225639	9.55e-06	up
Gh_D04G1489	1.77915	12.7158	-2.42322	4.04712e-42	0.0061379	0.000759657	down	Gh_A03G0649	11.3075	27.0626	-1.27624	3.7271e-40	0.00375517	0.00299738	down	Gh_D09G0905	28.9718	7.30588	2.09045	7.05e-05	1.8e-05	3.03e-07	up
Gh_D07G1384	1.73259	12.5385	-2.42322	4.04712e-42	0.0061379	0.000759657	down	Gh_A08G2548	10.9315	27.1473	-1.27624	3.7271e-40	0.00375517	0.00299738	down	Gh_D07G2314	41.4161	10.4002	2.1046	0.000160345	1.06e-07	3.02e-10	up
Gh_D12G0146	2.06756	13.4815	-2.42322	4.04712e-42	0.0061379	0.000759657	down	Gh_D13G0188	11.3034	27.1823	-1.27624	3.7271e-40	0.00375517	0.00299738	down	Gh_A02G0368	14.2034	3.02432	2.13936	6.25e-05	0.00741015	0.000951203	up
Gh_A02G0063	3.39469	17.0832	-2.31219	5.12699e-41	0.00150711	0.000123924	down	Gh_D05G3613	15.2284	36.0096	-1.25409	5.69805e-39	0.00070137	0.000423661	down	Gh_A10G0107	57.1243	14.1752	2.11427	3.75e-05	1.1e-10	2.92e-14	up
Gh_A08G2381	23.6142	86.6846	-1.82688	7.92982e-43	6.88527e-13	1.40539e-16	down	Gh_A12G1102	20.4352	45.6474	-1.20009	3.00071e-38	0.000167033	8.31151e-05	down	Gh_D04G0482	18.0252	4.21218	2.13936	3.54e-05	0.00145404	0.000101927	up
Gh_D13G0680	5.27732	24.4794	-2.14554	1.16515e-41	0.000155973	7.40581e-06	down	Gh_A08G1748	16.2006	38.0522	-1.24086	1.81156e-39	0.000527914	0.00030634	down	Gh_A03G0894	46.6801	11.717	2.10899	1.98e-05	8.07e-09	9.61e-12	up
Gh_D03G1150	16.5296	65.2097	-1.89445	2.64513e-41	3.68291e-10	4.70434e-13	down	Gh_D05G2745	16.3525	38.0344	-1.24086	1.81156e-39	0.000527914	0.00030634	down	Gh_A07G2101	45.069	11.2249	2.10765	6.5e-05	1.91e-08	3.06e-11	up
Gh_A10G0603	6.36292	25.7493	-2.01775	9.63081e-41	0.000120889	7.31856e-06	down	Gh_D11G3503	15.9521	38.33	-1.24086	1.81156e-39	0.000527914	0.00030634	down	Gh_D09G0595	9.72826	2.3956	2.13936	0.000129766	0.0365276	0.0086764	up
Gh_A08G1183	4.0149	19.7031	-2.17789	5.58003e-41	0.000643733	4.96197e-05	down	Gh_D05G2605	32.2214	71.6735	-1.17613	9.12071e-39	2.10054e-06	3.82173e-07	down	Gh_D12G0898	16.3953	3.90042	2.13936	0.000806959	0.00330322	0.000311986	up
Gh_A08G2236	4.42839	19.5505	-2.17789	5.58003e-41	0.000643733	4.96197e-05	down	Gh_A03G0500	8.54201	22.1456	-1.26237	1.24945e-38	0.0112902	0.011031	down	Gh_D12G2792	12.4159	2.84177	2.13936	0.00167392	0.016367	0.00289203	up
Gh_D12G0212	3.8187	20.3701	-2.17789	5.58003e-41	0.000643733	4.96197e-05	down	Gh_A05G2466	9.37253	22.295	-1.26237	1.24945e-38	0.0112902	0.011031	down	Gh_A06G1139	668.257	160.579	2.19197	1.18e-07	3.05e-116	1.16e-174	up
Gh_D07G0448	16.1265	60.1935	-1.86477	3.68283e-40	2.76074e-09	7.89235e-12	down	Gh_D03G1823	8.98065	22.1693	-1.26237	1.24945e-38	0.0112902	0.011031	down	Gh_A05G1352	135.298	33.127	2.15009	1.7e-06	1.51e-25	2.18e-34	up
Gh_A07G0583	8.54619	35.5245	-1.93217	1.00623e-40	5.40534e-06	1.5065e-07	down	Gh_D06G2284	9.47634	22.325	-1.26237	1.24945e-38	0.0112902	0.011031	down	Gh_A11G0985	27.6424	6.80732	2.13936	7.67e-05	2.18e-05	3.35e-07	up
Gh_A04G1436	5.28237	22.5762	-2.08542	1.20988e-41	0.000278089	1.92128e-05	down	Gh_A08G0994	34.363	74.9692	-1.14848	1.273e-39	2.01524e-06	3.65631e-07	down	Gh_A03G1059	34.1515	8.24351	2.13936	0.000132448	1.69e-06	1.07e-08	up
Gh_A10G2163	5.33571	23.0878	-2.08542	1.20988e-41	0.000278089	1.92128e-05	down	Gh_A02G1669	27.7897	63.084	-1.17434	7.94333e-39	1.03521e-05	2.88147e-06	down	Gh_D09G1187	43.2139	10.0395	2.17331	0.00014488	2.81e-08	3.68e-11	up
Gh_D11G2913	5.52199	25.4353	-1.96225	3.11014e-41	0.000215867	1.83222e-05	down	Gh_D07G0317	27.7142	63.2297	-1.17434	7.94333e-39	1.03521e-05	2.88147e-06	down	Gh_A03G0154	130.37	31.0951	2.18445	1.88e-06	6.46e-25	9.07e-34	up
Gh_D02G1282	34.1173	113.823	-1.72119	1.83275e-39	1.45462e-15	5.33805e-20	down	Gh_D11G1589	20.8426	47.7032	-1.19214	1.96094e-39	0.000126373	5.93733e-05	down	Gh_A10G1287	129.797	31.0087	2.18445	1.88e-06	6.46e-25	9.07e-34	up
Gh_D01G0937	7.65907	31.686	-1.92517	1.26742e-40	2.32845e-05	9.99012e-07	down	Gh_D02G0446	12.3255	28.5397	-1.25724	6.68559e-42	0.00282575	0.00217768	down	Gh_D11G2953	124.419	29.7845	2.18667	1.21e-05	8.79e-24	2.98e-32	up
Gh_A12G1852	2.62148	15.7499	-2.2273	6.98447e-42	0.00265429	0.000321319	down	Gh_D10G1930	11.6148	28.8842	-1.25724	6.68559e-42	0.00282575	0.00217768	down	Gh_D07G1347	19.337	4.46091	2.21736	3.22e-05	0.00076842	3.59e-05	up
Gh_D07G0028	2.52144	15.6657	-2.2273	6.98447e-42	0.00265429	0.000321319	down	Gh_D01G2043	85.3054	175.743	-1.06504	2.20482e-38	6.13677e-11	1.28569e-14	down	Gh_A01G1324	128.316	30.1193	2.20862	2.01e-06	9.64e-25	1.06e-33	up
Gh_D13G1392	2.94238	15.8007	-2.2273	6.98447e-42	0.00265429	0.000321319	down	Gh_D13G2138	29.1078	64.5748	-1.16933	8.33316e-39	7.83376e-06	2.05661e-06	down	Gh_A12G0237	147.071	34.567	2.20975	1.68e-06	2.05e-28	9.9e-39	up
Gh_A04G0369	2.03598	12.0344	-2.31219	3.25197e-41	0.0105641	0.00207116	down	Gh_D09G2285	91.7446	188.912	-1.05414	7.45094e-39	3.80386e-11	2.17073e-15	down	Gh_A01G1913	684.703	156.677	2.26452	4.47e-08	5.55e-122	2.47e-186	up
Gh_A07G1096	1.55949	11.5867	-2.31219	3.25197e-41	0.0105641	0.00207116	down	Gh_A09G1509	17.4764	40.1039	-1.22904	1.95922e-38	0.00039701	0.000221471	down	Gh_D01G0901	17.4009	3.61232	2.22682	0.00072753	0.00175617	0.000110632	up
Gh_A12G1004	2.12112	12.4761	-2.31219	3.25197e-41	0.0105641	0.00207116	down	Gh_D08G2334	24.7288	56.3021	-1.16627	3.64514e-38	4.07448e-05	1.54312e-05	down	Gh_D12G0276	14.9994	3.43251	2.2389	5.39e-05	0.00399823	0.000336893	up
Gh_D05G0630	2.19012	12.3197	-2.31219	3.25197e-41	0.0105641	0.00207116	down	Gh_D07G0734	41.3422	90.1083	-1.1435	1.58102e-39	1.85685e-07	1.68884e-08	down	Gh_A01G0982	167.455	38.507	2.23766	2.14e-07	1.38e-32	1.11e-44	up
Gh_D12G1478	6.55809	28.0743	-1.91627	3.65641e-41	9.51787e-05	6.76335e-06	down	Gh_D08G1070	24.1325	53.5129	-1.17198	1.26994e-38	5.40241e-05	2.1563e-05	down	Gh_D11G0468	13.0943	2.89363	2.25484	0.0014566	0.00894517	0.00101843	up
Gh_A08G2235	8.47751	30.5276	-1.88008	1.05597e-39	4.18037e-05	2.4452e-06	down	Gh_A13G1991	13.1787	30.9206	-1.24084	8.56153e-40	0.00213	0.00156951	down	Gh_D02G1283	251.371	56.8364	2.27801	2.37e-06	1.33e-49	1.16e-68	up
Gh_D02G2235	11.8298	44.2363	-1.82215	3.42231e-39	8.09027e-07	1.71886e-08	down	Gh_D09G1585	13.2477	31.4658	-1.24084	8.56153e-40	0.00213	0.00156951	down	Gh_A12G1407	56.4731	12.2714	2.30286	1.76e-05	3.41e-11	1.53e-15	up
Gh_A01G2084	6.17485	23.7525	-1.90454	1.36633e-41	0.000387739	4.53746e-05	down	Gh_A11G0232	42.1762	91.5987	-1.14069	2.22289e-38	1.4247e-07	1.1826e-08	down	Gh_D11G1595	44.2396	9.91771	2.27686	5.23e-06	9.18e-09	4.56e-12	up
Gh_A07G1775	5.29826	22.2544	-2.02269	2.98239e-41	0.00050023	4.93483e-05	down	Gh_A01G0741	9.97304	23.5232	-1.24083	2.2698e-39	0.00851652	0.00795687	down	Gh_D11G0156	15.6504	3.20194	2.33201	4.84e-05	0.00214036	0.000116699	up
Gh_A06G0810	37.1471	115.525	-1.62589	5.19276e-41	8.09989e-15	7.96923e-19	down	Gh_A12G0583	10.4843	23.824	-1.24083	2.2698e-39	0.00851652	0.00795687	down	Gh_A12G1143	297.517	64.7429	2.33373	1.01e-05	1.08e-59	8.7e-84	up
Gh_A01G1773	13.4069	47.1027	-1.80525	4.61035e-40	3.47526e-07	6.19549e-09	down	Gh_A13G1133	9.5018	23.5077	-1.24083	2.2698e-39	0.00851652	0.00795687	down	Gh_D12G0765	13.7299	2.73063	2.36175	0.00128895	0.00483501	0.000353076	up
Gh_D06G0788	184.021	522.647	-1.49612	2.9421e-40	1.09479e-20	6.28115e-42	down	Gh_A13G1985	9.91565	23.5696	-1.24083	2.2698e-39	0.00851652	0.00795687	down	Gh_A08G1660	225.935	48.6848	2.34483	4.47e-06	1.36e-45	5.55e-64	up
Gh_A13G1212	7.11647	26.7751	-1.86474	1.22904e-40	0.000169503	1.64436e-05	down	Gh_A12G0812	23.4326	52.1952	-1.17816	6.91874e-42	7.11981e-05	3.00973e-05	down	Gh_D05G3283	26.3144	5.13932	2.38037	3.11e-05	2.08e-05	1.36e-07	up
Gh_A01G0537	2.7917	14.6874	-2.1371	1.74637e-41	0.0046489	0.000831837	down	Gh_A03G0184	79.9836	163.378	-1.04148	2.16379e-38	4.24805e-10	4.25544e-13	down	Gh_A13G0812	12.2388	2.23574	2.40239	9.48e-05	0.0108429	0.00105796	up
Gh_A12G0388	3.41817	14.5174	-2.1371	1.74637e-41	0.0046489	0.000831837	down	Gh_D03G0463	15.1012	34.7663	-1.21401	6.06583e-39	0.00118545	0.00081459	down	Gh_D05G3464	11.5733	2.34372	2.40239	9.48e-05	0.0108429	0.00105796	up
Gh_D05G1758	3.45542	14.5929	-2.1371	1.74637e-41	0.0046489	0.000831837	down	Gh_D09G2393	15.2883	34.9829	-1.21401	6.06583e-39	0.00118545	0.00081459	down	Gh_D12G1525	106.913	22.356	2.38897	6.44e-07	7.41e-22	6.12e-31	up
Gh_A03G1723	8.73906	33.0239	-1.80843	7.87065e-40	3.30186e-05	2.1122e-06	down	Gh_A10G1295	20.9691	47.0193	-1.16208	2.04898e-39	0.000209023	0.000110626	down	Gh_D01G1448	1494.33	277.706	2.56474	3.39e-06	4.76e-214	0	up
Gh_A06G0066	29.2231	93.4521	-1.65465	2.67353e-40	2.30281e-12	1.70802e-15	down	Gh_D09G0171	20.9219	47.4052	-1.16208	2.04898e-39	0.000209023	0.000110626	down	Gh_A11G0142	17.3174	3.32187	2.41947	4.4e-05	0.00115642	3.9e-05	up
Gh_D03G1808	5.74758	22.5843	-1.84441	1.42554e-41	0.000695597	0.000111222	down	Gh_D13G2073	21.3601	46.7904	-1.16208	2.04898e-39	0.000209023	0.000110626	down	Gh_A08G1012	65.8702	13.3156	2.42887	3.13e-05	1.23e-13	1.82e-19	up
Gh_D01G1417	3.95184	17.5134	-2.02979	2.4875e-41	0.00204553	0.000322254	down	Gh_D03G0479	108.706	217.544	-1.01635	3.6904e-39	4.34195e-11	1.6044e-16	down	Gh_D13G2344	48.3889	9.65635	2.4024	4.54e-06	6.92e-10	5.18e-14	up
Gh_D01G1663	4.11243	18.1061	-2.02979	2.4875e-41	0.00204553	0.000322254	down	Gh_D07G1428	28.4183	61.8881	-1.15143	8.34572e-39	1.72032e-05	5.48229e-06	down	Gh_A12G2733	19.9153	3.92965	2.46129	0.000561822	0.000266527	4.11e-06	up
Gh_D09G1857	3.50198	18.2334	-2.02979	2.4875e-41	0.00204553	0.000322254	down	Gh_D10G1409	15.8746	36.6502	-1.20289	1.92098e-39	0.000887731	0.000586537	down	Gh_D01G0522	20.118	3.90137	2.46129	0.000561822	0.000266527	4.11e-06	up
Gh_A05G1424	376.446	974.116	-1.36273	4.35595e-40	1.02984e-17	1.73226e-30	down	Gh_A08G0649	11.3508	26.384	-1.2228	4.12016e-40	0.00636778	0.00570065	down	Gh_D06G0612	24.8725	4.9737	2.46129	0.000324199	2.6e-05	1.37e-07	up
Gh_D07G1945	22.7987	75.2928	-1.67415	4.01388e-41	2.93011e-10	9.51217e-13	down	Gh_A10G0238	11.3075	25.6447	-1.2228	4.12016e-40	0.00636778	0.00570065	down	Gh_D09G0035	251.042	50.5532	2.43848	5.08e-07	6.7e-52	2.15e-74	up
Gh_D04G1081	52.9967	158.674	-1.56682	1.78087e-39	1.87248e-18	3.50389e-24	down	Gh_D10G0498	11.2322	25.7597	-1.2228	4.12016e-40	0.00636778	0.00570065	down	Gh_A02G1340	1220.21	219.201	2.61347	2.82e-08	3.91e-192	0	up
Gh_A13G0693	20.4431	65.0001	-1.66618	3.63187e-41	6.39016e-09	5.24326e-11	down	Gh_A12G1933	39.4541	83.5153	-1.11575	1.55918e-39	8.55622e-07	1.20778e-07	down	Gh_D01G2106	15.1321	2.8582	2.46129	0.00112861	0.00263669	0.000118817	up
Gh_D02G0169	8.19751	28.5742	-1.78545	1.43896e-40	0.000132304	1.41056e-05	down	Gh_A12G1517	33.7806	72.9742	-1.10974	3.20792e-39	5.31404e-06	1.27767e-06	down	Gh_A04G1325	914.415	170.197	2.56153	3.1e-08	7.21e-165	5.84e-287	up
Gh_D12G0973	8.29681	29.185	-1.78545	1.43896e-40	0.000132304	1.41056e-05	down	Gh_D03G1399	63.9124	131.016	-1.04668	1.87995e-41	7.97655e-09	1.08815e-10	down	Gh_A02G0978	18.2444	3.41671	2.50193	4.04e-05	0.000621532	1.27e-05	up
Gh_A03G0358	1.79829	10.5645	-2.1919	1.0832e-43	0.0181446	0.00546649	down	Gh_A04G1295	5.66061	14.5303	-1.27219	1.57638e-40	0.0447689	0.0540723	down	Gh_A12G1497	80.1789	15.8318	2.46129	1.34e-05	1.22e-16	6.06e-24	up
Gh_A03G1323	2.21085	10.6839	-2.1919	1.0832e-43	0.0181446	0.00546649	down	Gh_A07G2231	6.09066	15.3319	-1.27219	1.57638e-40	0.0447689	0.0540723	down	Gh_A03G0455	13.1233	2.0789	2.51787	8.35e-05	0.00602096	0.000354187	up
Gh_A07G1731	1.97837	10.8319	-2.1919	1.0832e-43	0.0181446	0.00546649	down	Gh_A11G2032	5.71708	14.7841	-1.27219	1.57638e-40	0.0447689	0.0540723	down	Gh_A04G0925	81.1519	15.5807	2.47921	1.32e-05	6.47e-17	1.9e-24	up
Gh_A07G2025	1.5888	11.3542	-2.1919	1.0832e-43	0.0181446	0.00546649	down	Gh_D01G1856	5.60479	15.0731	-1.27219	1.57638e-40	0.0447689	0.0540723	down	Gh_D05G0223	21.1902	3.8978	2.53168	0.00052256	0.000144811	1.31e-06	up
Gh_A08G1325	2.29664	10.7429	-2.1919	1.0832e-43	0.0181446	0.00546649	down	Gh_D06G2132	6.16402	15.401	-1.27219	1.57638e-40	0.0447689	0.0540723	down	Gh_D07G0549	35.7364	6.77304	2.50193	5.11e-05	1.25e-07	4.83e-11	up
Gh_A13G0247	2.07331	10.7115	-2.1919	1.0832e-43	0.0181446	0.00546649	down	Gh_D08G1136	6.35379	15.365	-1.27219	1.57638e-40	0.0447689	0.0540723	down	Gh_D11G2343	36.2209	6.73116	2.50193	5.11e-05	1.25e-07	4.83e-11	up
Gh_A13G1763	1.87697	11.2249	-2.1919	1.0832e-43	0.0181446	0.00546649	down	Gh_A11G1042	22.1998	48.849	-1.156	6.78273e-39	0.000156638	7.95884e-05	down	Gh_A11G2587	181.22	33.5635	2.55174	1.28e-06	2.17e-38	1.82e-56	up
Gh_D01G1766	2.26972	11.3967	-2.1919	1.0832e-43	0.0181446	0.00546649	down	Gh_D10G1186	22.009	49.3409	-1.156	6.78273e-39	0.000156638	7.95884e-05	down	Gh_D02G2338	109.041	20.3235	2.54999	3.53e-06	4.17e-23	5.93e-34	up
Gh_D10G0463	2.31313	10.6264	-2.1919	1.0832e-43	0.0181446	0.00546649	down	Gh_D11G0431	22.0239	49.1733	-1.156	6.78273e-39	0.000156638	7.95884e-05	down	Gh_D13G0678	16.1063	2.92083	2.5544	0.00102603	0.00145037	3.85e-05	up
Gh_D10G1050	2.46311	11.0948	-2.1919	1.0832e-43	0.0181446	0.00546649	down	Gh_A06G1246	63.1637	128.57	-1.0471	3.31113e-38	9.85637e-09	1.53275e-10	down	Gh_A03G1051	34.6318	6.10519	2.5682	6.99e-05	1.59e-07	4.69e-11	up
Gh_D13G1517	2.1215	11.4457	-2.1919	1.0832e-43	0.0181446	0.00546649	down	Gh_A13G0858	24.0764	52.9799	-1.14526	1.3204e-38	8.84243e-05	4.00506e-05	down	Gh_D12G1623	125.625	22.7226	2.59308	2.55e-06	6.39e-27	5.37e-40	up
Gh_A09G0736	4.82037	21.4124	-1.9571	2.49289e-40	0.000886529	0.000124634	down	Gh_D08G2220	30.8308	67.5873	-1.13932	1.70372e-38	7.4772e-06	1.93854e-06	down	Gh_D13G1482	11.049	1.98438	2.59879	0.00289894	0.0134788	0.00104103	up
Gh_D04G1053	4.71299	20.8457	-1.9571	2.49289e-40	0.000886529	0.000124634	down	Gh_A01G2148	7.83373	18.8873	-1.21638	7.46863e-42	0.0252371	0.0287356	down	Gh_A09G0036	117.647	20.6951	2.62969	3.68e-06	2.16e-25	4.91e-38	up
Gh_D08G0839	17.962	57.8409	-1.65121	8.00753e-43	5.87654e-08	9.97134e-10	down	Gh_A08G2290	7.58233	18.9699	-1.21638	7.46863e-42	0.0252371	0.0287356	down	Gh_D01G1180	2238.19	337.954	2.86575	6.73e-12	0	0	up
Gh_D02G2177	10.7462	37.8596	-1.7335	2.40556e-41	1.09557e-05	6.30917e-07	down	Gh_A09G0437	8.48011	18.6567	-1.21638	7.46863e-42	0.0252371	0.0287356	down	Gh_A11G1659	1936.95	279.116	2.93169	9.65e-07	9.62e-297	0	up
Gh_D05G3468	95.0772	260.802	-1.44497	2.30761e-40	6.75771e-21	2.1995e-32	down	Gh_D01G0692	8.27187	19.0522	-1.21638	7.46863e-42	0.0252371	0.0287356	down	Gh_D08G1323	188.87	31.091	2.72432	1.08e-06	2.76e-41	2.37e-63	up
Gh_D01G0583	6.41225	21.8509	-1.78168	3.50638e-43	0.00125636	0.000260202	down	Gh_D13G2394	7.56938	18.6549	-1.21638	7.46863e-42	0.0252371	0.0287356	down	Gh_D02G0887	8.63917	1.43249	2.72432	0.000229743	0.0306018	0.00303643	up
Gh_A10G0844	30.4015	90.9219	-1.57535	9.82907e-40	1.86936e-11	3.70346e-14	down	Gh_A04G0547	52.2775	108.844	-1.07936	7.90429e-38	4.77583e-08	2.27233e-09	down	Gh_D12G0051	22.0563	3.16108	2.79144	3e-05	5.76e-05	1.15e-07	up
Gh_A06G0824	3.1624	13.8191	-2.04089	7.84065e-42	0.00809171	0.00213732	down	Gh_A09G2488	16.8196	38.6378	-1.19296	6.29116e-42	0.000665807	0.000417183	down	Gh_D12G1451	36.8923	5.83155	2.76385	5.72e-05	3.4e-08	1.24e-12	up
Gh_D10G0360	3.04368	14.0232	-2.04089	7.84065e-42	0.00809171	0.00213732	down	Gh_D08G1156	23.4186	50.5322	-1.15041	2.2397e-39	0.000118062	5.65543e-05	down	Gh_A12G0036	19.027	2.72575	2.80233	0.000809392	0.000248595	1.13e-06	up
Gh_D12G0551	3.24248	14.1998	-2.04089	7.84065e-42	0.00809171	0.00213732	down	Gh_D13G2390	22.9346	50.512	-1.15041	2.2397e-39	0.000118062	5.65543e-05	down	Gh_A04G0990	40.9521	6.2563	2.79647	4.66e-05	4.31e-09	3.69e-14	up
Gh_D12G2457	3.19748	14.1963	-2.04089	7.84065e-42	0.00809171	0.00213732	down	Gh_A03G1089	60.6863	122.518	-1.02477	1.83573e-41	3.6298e-08	1.03221e-09	down	Gh_D06G0945	56.508	8.77934	2.78961	0.000105338	1.79e-12	2.04e-19	up
Gh_A05G1223	13.8161	46.2578	-1.67146	5.64003e-40	1.60828e-06	6.60854e-08	down	Gh_A08G0947	18.0757	39.6157	-1.14887	8.31447e-40	0.000825889	0.000561661	down	Gh_A11G3146	10.4152	1.46834	2.87632	0.00019288	0.017674	0.000949805	up
Gh_A08G0884	12.7266	43.4037	-1.67833	2.60917e-39	3.66289e-06	1.84073e-07	down	Gh_A01G0555	11.6986	27.647	-1.20748	4.18427e-39	0.0047424	0.00410992	down	Gh_D12G0833	89.8538	13.3845	2.87633	2.09e-05	5.32e-20	6.51e-32	up
Gh_D13G0457	12.4152	39.8514	-1.68627	1.65395e-39	8.56929e-06	5.14069e-07	down	Gh_A10G0692	11.8048	27.8092	-1.20748	4.18427e-39	0.0047424	0.00410992	down	Gh_D08G0082	23.5922	3.14608	2.91697	2.68e-05	1.84e-05	1.01e-08	up
Gh_D03G1465	8.24817	28.0765	-1.73569	2.02087e-41	0.000239007	3.32902e-05	down	Gh_D08G0300	11.9129	27.8538	-1.20748	4.18427e-39	0.0047424	0.00410992	down	Gh_A08G1045	273.39	40.1089	2.89227	1.95e-08	8.65e-61	1.76e-97	up
Gh_A13G1539	38.1013	109.3	-1.49848	1.47593e-40	1.03958e-12	8.94312e-16	down	Gh_A04G1281	43.1943	92.2909	-1.10714	1.33293e-38	2.96351e-07	2.9379e-08	down	Gh_D06G0914	10.5225	1.39636	2.94671	0.000551046	0.0136827	0.000525469	up
Gh_A13G0138	5.21424	20.4325	-1.88838	1.06615e-40	0.00159444	0.000297391	down	Gh_A11G2469	30.2973	65.0846	-1.12124	4.70086e-38	1.61719e-05	5.13791e-06	down	Gh_D06G0460	187.685	26.5592	2.93906	1.67e-06	5.06e-42	3.5e-68	up
Gh_D09G1869	5.33665	19.5643	-1.88838	1.06615e-40	0.00159444	0.000297391	down	Gh_A13G2343	88.5066	177.162	-1.00721	7.90453e-39	5.14371e-10	1.99775e-13	down	Gh_A12G0131	32.43	4.17891	2.96944	1.49e-05	3.03e-07	9.05e-12	up
Gh_D11G1618	4.992	19.7972	-1.88838	1.06615e-40	0.00159444	0.000297391	down	Gh_D09G0486	20.8268	46.4171	-1.13138	2.14621e-39	0.000345983	0.000203486	down	Gh_A13G0263	53.8823	7.21999	2.98736	2.81e-05	3.93e-12	6.72e-20	up
Gh_D13G1243	21.1931	64.3721	-1.57527	3.21961e-40	2.82534e-08	4.93631e-10	down	Gh_D08G1120	35.4808	74.4828	-1.08802	3.44242e-39	6.66512e-06	1.65292e-06	down	Gh_A10G0937	10.7792	1.0789	3.01383	0.000166221	0.0106214	0.000289865	up
Gh_D07G1197	228.901	571.295	-1.30745	1.65508e-40	3.14671e-16	3.00893e-32	down	Gh_D03G0476	7.09971	17.2779	-1.24083	1.29441e-38	0.0333118	0.0394166	down	Gh_A12G0708	10.9087	1.28581	3.01383	0.000166221	0.0106214	0.000289865	up
Gh_A09G1721	4.07675	16.7736	-1.94962	8.63198e-41	0.00363012	0.000800107	down	Gh_D08G2448	7.10507	16.9386	-1.24083	1.29441e-38	0.0333118	0.0394166	down	Gh_A07G1696	139.424	17.5931	3.08838	8.93e-06	2.62e-31	6.14e-53	up
Gh_D08G2474	3.87313	17.2139	-1.94962	8.63198e-41	0.00363012	0.000800107	down	Gh_D10G0695	7.40352	17.4566	-1.24083	1.29441e-38	0.0333118	0.0394166	down	Gh_D11G2709	20.0113	2.45302	3.13936	4.58e-05	0.000122487	7.8e-08	up
Gh_D11G0427	3.62578	16.5549	-1.94962	8.63198e-41	0.00363012	0.000800107	down	Gh_D04G0645	8.90083	20.9387	-1.19678	1.43379e-38	0.0188248	0.0208416	down	Gh_D12G1264	86.2678	10.5932	3.10619	3.6e-09	2.21e-19	6.51e-33	up
Gh_D12G1593	4.46888	17.4438	-1.94962	8.63198e-41	0.00363012	0.000800107	down	Gh_D05G3508	9.22592	21.2923	-1.19678	1.43379e-38	0.0188248	0.0208416	down	Gh_A13G1540	59.0594	7.35965	3.11511	2.51e-05	2.51e-13	1.2e-22	up
Gh_D01G2294	19.1398	57.9256	-1.57526	3.90343e-41	1.45539e-07	4.0208e-09	down	Gh_A09G1299	12.7657	29.964	-1.1943	7.00068e-39	0.00357411	0.00297558	down	Gh_A11G2394	52.2116	6.38373	3.13936	3.47e-05	9.41e-12	4.13e-20	up
Gh_A03G1036	58.4194	160.242	-1.44693	3.74989e-39	1.05379e-16	1.08023e-21	down	Gh_A11G1803	13.1773	30.3579	-1.1943	7.00068e-39	0.00357411	0.00297558	down	Gh_D11G0230	34.4766	3.57212	3.22682	0.000277485	9.53e-08	1.55e-13	up
Gh_A08G1780	29.887	87.6119	-1.52725	5.6035e-41	1.0026e-10	3.94879e-13	down	Gh_A09G0135	14.5824	34.3125	-1.17278	6.48661e-39	0.00199727	0.00152993	down	Gh_A07G1013	238.566	23.8345	3.45526	4.63e-10	1.07e-53	5.32e-101	up
Gh_A07G2341	21.1736	62.8753	-1.55272	3.30379e-40	5.00029e-08	1.08491e-09	down	Gh_A09G1420	15.3903	33.8323	-1.17278	6.48661e-39	0.00199727	0.00152993	down	Gh_A05G3485	9.9325	0.67576	3.46128	0.0602367	0.0169725	0.000212789	up
Gh_D12G0472	6.56426	23.664	-1.69808	2.59931e-40	0.000981069	0.000217072	down	Gh_A12G1735	19.8984	44.1891	-1.13666	3.37689e-38	0.000464174	0.000285967	down	Gh_A08G0891	10.1616	0.900046	3.46128	0.0602367	0.0169725	0.000212789	up
Gh_A01G0805	9.09632	29.9026	-1.67308	2.30623e-41	0.000187495	2.72878e-05	down	Gh_D04G1792	19.6926	43.6394	-1.13666	3.37689e-38	0.000464174	0.000285967	down	Gh_D06G0760	10.2225	0.75188	3.46128	0.0602367	0.0169725	0.000212789	up
Gh_A02G0708	11.0425	36.4267	-1.65653	2.66778e-41	3.62331e-05	3.39743e-06	down	Gh_D05G0122	19.9399	44.1745	-1.13666	3.37689e-38	0.000464174	0.000285967	down	Gh_D01G1261	26.0139	2.10187	3.51787	4.76e-05	6.52e-06	3.35e-11	up
Gh_A12G1689	10.937	35.7712	-1.65653	2.66778e-41	3.62331e-05	3.39743e-06	down	Gh_D10G2388	22.0597	47.8377	-1.12655	7.09345e-39	0.000258192	0.000145497	down	Gh_D02G0008	11.3336	0.801332	3.59879	0.0484169	0.0111857	5.91e-05	up
Gh_D03G1454	18.0058	53.6964	-1.54902	3.86176e-41	5.87864e-07	2.53487e-08	down	Gh_D11G1372	22.1881	47.9676	-1.12655	7.09345e-39	0.000258192	0.000145497	down	Gh_A03G0155	96.6036	8.83743	3.56935	5.58e-06	1.29e-21	4.44e-42	up
Gh_D09G0238	13.9607	43.7802	-1.60803	8.49775e-40	5.12339e-06	3.31976e-07	down	Gh_D05G1836	58.2251	116.658	-1.02502	6.02012e-38	7.27326e-08	2.96651e-09	down	Gh_A10G2040	44.9805	3.59463	3.63121	0.0002034	5.05e-10	8.24e-20	up
Gh_A03G0563	8.01408	26.9844	-1.68416	1.62382e-40	0.00042869	7.78885e-05	down	Gh_A07G0876	16.0775	36.1955	-1.16389	6.58554e-42	0.00147996	0.00109744	down	Gh_A09G2529	87.6355	7.32289	3.6919	1.65e-05	2.13e-19	2.93e-39	up
Gh_D05G1322	6.4325	21.3394	-1.71609	3.76116e-43	0.00224663	0.000596247	down	Gh_A13G1990	16.2974	36.4879	-1.16389	6.58554e-42	0.00147996	0.00109744	down	Gh_D01G1186	8.78692	0	4.30852	3.15e-09	0.0389963	0.000116179	up
Gh_A02G1336	225.026	553.217	-1.28665	1.32301e-39	9.87046e-16	1.95116e-31	down	Gh_D09G1428	15.6763	35.6055	-1.16389	6.58554e-42	0.00147996	0.00109744	down	Gh_D03G1511	8.99822	0	4.30852	3.15e-09	0.0389963	0.000116179	up
Gh_A05G1579	23.0535	68.1824	-1.53376	4.84079e-41	1.73916e-08	2.92462e-10	down	Gh_D05G2956	27.1418	57.609	-1.10753	2.70371e-39	6.18011e-05	2.65615e-05	down	Gh_D07G1442	9.40851	0	4.30852	3.15e-09	0.0389963	0.000116179	up
Gh_A07G2273	20.1693	59.4895	-1.52756	4.34855e-41	1.98571e-07	6.86915e-09	down	Gh_D04G0449	14.4856	31.7707	-1.18284	6.92702e-42	0.00267551	0.00213889	down	Gh_A03G1916	9.8655	0	4.46052	2.35e-09	0.0287363	2.98e-05	up
Gh_A08G2290	5.28691	18.9699	-1.81623	3.45511e-43	0.00286381	0.000709549	down	Gh_A08G2116	10.2107	23.3274	-1.18071	2.56579e-39	0.0140087	0.0149518	down	Gh_A05G1103	10.3256	0.439774	4.46052	2.35e-09	0.0287363	2.98e-05	up
Gh_A11G0366	5.37149	19.0409	-1.81623	3.45511e-43	0.00286381	0.000709549	down	Gh_A02G1456	27.6503	60.4448	-1.1045	8.96355e-39	4.69836e-05	1.89163e-05	down	Gh_A13G0400	10.7279	0	4.59803	1.8e-09	0.0215255	7.35e-06	up
Gh_A11G2610	5.17855	18.9624	-1.81623	3.45511e-43	0.00286381	0.000709549	down	Gh_D08G0035	36.0612	75.4511	-1.06718	1.32003e-37	8.01846e-06	2.1253e-06	down	Gh_D02G1404	11.0675	0	4.59803	1.8e-09	0.0215255	7.35e-06	up
Gh_D10G0384	5.06323	19.0164	-1.81623	3.45511e-43	0.00286381	0.000709549	down	Gh_D09G2112	29.1301	62.0216	-1.10168	9.38238e-39	3.5465e-05	1.34432e-05	down	Gh_D11G0173	11.3097	0	4.59803	1.8e-09	0.0215255	7.35e-06	up
Gh_D11G3344	5.21988	19.0965	-1.81623	3.45511e-43	0.00286381	0.000709549	down	Gh_A08G1938	17.5195	38.5633	-1.11279	2.09205e-39	0.00136329	0.00102879	down	Gh_D12G0723	10.9087	0	4.59803	1.8e-09	0.0215255	7.35e-06	up
Gh_A05G2483	2.65834	13.3938	-1.9378	4.85958e-41	0.0142984	0.00532368	down	Gh_D01G0809	17.977	39.2619	-1.11279	2.09205e-39	0.00136329	0.00102879	down	Gh_A06G0841	12.493	0	4.72356	1.41e-09	0.0165787	1.8e-06	up
Gh_A07G0263	3.44707	13.3869	-1.9378	4.85958e-41	0.0142984	0.00532368	down	Gh_D01G2080	56.4988	112.74	-1.02521	5.66074e-39	1.16923e-07	6.02565e-09	down	Gh_D05G0193	11.8613	0	4.72356	1.41e-09	0.0165787	1.8e-06	up
Gh_A08G1919	3.36362	12.618	-1.9378	4.85958e-41	0.0142984	0.00532368	down	Gh_A12G1526	11.0827	25.0002	-1.16731	4.59508e-40	0.0105702	0.0108277	down	Gh_D05G2986	12.0706	0	4.72356	1.41e-09	0.0165787	1.8e-06	up
Gh_A09G1760	2.75526	12.968	-1.9378	4.85958e-41	0.0142984	0.00532368	down	Gh_D03G0942	11.2723	25.2075	-1.16731	4.59508e-40	0.0105702	0.0108277	down	Gh_A01G1529	50.6754	2.00831	4.48986	2.69e-05	6.08e-10	3.49e-26	up
Gh_D02G0931	3.17297	12.6793	-1.9378	4.85958e-41	0.0142984	0.00532368	down	Gh_D07G0841	18.636	40.6611	-1.10811	2.14887e-39	0.00101964	0.000733832	down	Gh_A13G1482	13.3	0	4.83903	1.13e-09	0.0128668	4.35e-07	up
Gh_D03G1106	2.70284	12.7045	-1.9378	4.85958e-41	0.0142984	0.00532368	down	Gh_D05G2425	20.0281	42.6152	-1.10387	3.55891e-38	0.000755816	0.000521774	down	Gh_D13G0002	13.8338	0	4.94595	9.14e-10	0.0102384	1.05e-07	up
Gh_D06G1833	2.83872	13.3077	-1.9378	4.85958e-41	0.0142984	0.00532368	down	Gh_A06G1669	38.4119	77.9522	-1.04645	4.02292e-39	7.52455e-06	1.90978e-06	down	Gh_A08G0373	15.0593	0	5.04548	7.17e-10	0.00816561	2.53e-08	up
Gh_D11G1866	3.08676	12.9038	-1.9378	4.85958e-41	0.0142984	0.00532368	down	Gh_D06G1443	11.7412	27.3651	-1.15595	4.61761e-39	0.00793072	0.00771159	down	Gh_D01G0509	16.3342	0	5.13859	5.97e-10	0.00654558	6.04e-09	up
Gh_D10G1429	108.282	267.867	-1.29886	2.93252e-40	1.74504e-17	7.76722e-28	down	Gh_D06G1813	22.581	49.2388	-1.09326	7.87605e-42	0.00031604	0.000188011	down	Gh_A01G0484	18.6673	0	5.38652	3.64e-10	0.00361134	7.91e-11	up
Gh_D04G1078	23.8662	68.1843	-1.47364	5.11701e-41	4.17595e-08	1.06032e-09	down	Gh_A03G0864	15.4287	33.3105	-1.13035	7.08646e-42	0.00329868	0.00283302	down	Gh_D06G0796	19.0939	0	5.38652	3.64e-10	0.00361134	7.91e-11	up
Gh_A02G1781	9.67753	32.1878	-1.62032	1.51718e-40	0.000145983	2.17847e-05	down	Gh_D04G1059	14.925	32.8805	-1.13035	7.08646e-42	0.00329868	0.00283302	down	Gh_D05G3443	19.844	0	5.46052	3.14e-10	0.00298149	1.88e-11	up
Gh_D02G1517	9.75242	31.5706	-1.62032	1.51718e-40	0.000145983	2.17847e-05	down	Gh_D11G1187	15.046	33.2296	-1.13035	7.08646e-42	0.00329868	0.00283302	down	Gh_D03G1719	24.328	0	5.72355	1.79e-10	0.00150091	5.41e-14	up
Gh_D05G3295	54.9057	143.068	-1.3612	1.20656e-39	4.03115e-14	7.21125e-18	down	Gh_A04G1301	21.1201	44.5981	-1.10001	1.32538e-38	0.000569024	0.000371552	down	Gh_D13G0072	25.5752	0	5.83903	4.88e-08	0.00109889	2.88e-15	up
Gh_A01G1767	6.93548	22.6715	-1.63796	1.49519e-40	0.00175153	0.000482355	down	Gh_A09G1317	21.404	45.4231	-1.10001	1.32538e-38	0.000569024	0.000371552	down	Gh_D05G0563	34.1725	0	6.22605	6.19e-11	0.000360246	2.2e-20	up
Gh_A02G1674	6.70615	23.2849	-1.63796	1.49519e-40	0.00175153	0.000482355	down	Gh_A10G1012	21.4807	44.6418	-1.10001	1.32538e-38	0.000569024	0.000371552	down	Gh_A05G0433	35.2154	0	6.26787	2.15e-08	0.000318363	5.02e-21	up
Gh_D13G0160	6.83127	23.1445	-1.63796	1.49519e-40	0.00175153	0.000482355	down	Gh_A09G0502	42.1293	85.7601	-1.0439	1.9215e-39	2.58987e-06	4.67314e-07	down	Gh_A03G1682	37.1595	0	6.34804	4.7e-11	0.000249852	2.53e-22	up
Gh_A05G2474	4.30047	16.1477	-1.86473	2.86087e-41	0.00639062	0.00196011	down	Gh_D08G2410	51.2499	102.997	-1.02576	8.75948e-38	4.01875e-07	3.52419e-08	down	Gh_D07G1634	36.5636	0	6.34804	4.7e-11	0.000249852	2.53e-22	up
Gh_D07G2297	3.9477	16.2136	-1.86473	2.86087e-41	0.00639062	0.00196011	down	Gh_A12G0923	44.4222	89.8847	-1.0428	1.53037e-38	1.5427e-06	2.30974e-07	down	Gh_D11G2834	38.6745	0	6.42399	3.92e-11	0.000198952	1.31e-23	up
Gh_A12G1454	11.7527	36.8262	-1.57523	4.29264e-40	5.0538e-05	6.05089e-06	down	Gh_D08G0034	44.2279	89.7064	-1.0428	1.53037e-38	1.5427e-06	2.30974e-07	down	Gh_A02G0577	52.4418	0	6.83903	1.55e-11	5.34e-05	4.83e-32	up
Gh_A06G1622	87.3754	217.79	-1.31163	1.13058e-40	3.46517e-17	1.986e-24	down	Gh_D12G1225	43.9253	89.7888	-1.0428	1.53037e-38	1.5427e-06	2.30974e-07	down	Gh_D02G0591	54.7181	0	6.91995	1.31e-11	4.1e-05	5.53e-34	up
Gh_D04G0855	17.6686	52.0553	-1.49508	9.91763e-41	1.85378e-06	1.21417e-07	down	Gh_A05G1377	7.97549	17.6555	-1.14043	8.88605e-42	0.0419171	0.0526989	down	Gh_A12G1804	66.941	0	7.20468	6.71e-12	1.56e-05	8.51e-42	up
Gh_D05G0128	6.12224	20.2796	-1.64738	3.98814e-41	0.00400098	0.00136458	down	Gh_A11G2901	7.75336	17.5007	-1.14043	8.88605e-42	0.0419171	0.0526989	down	Gh_A06G2085	67.7885	0	7.22605	6.38e-12	1.45e-05	1.92e-42	up
Gh_D02G0251	49.3876	125.461	-1.33276	8.4917e-41	2.66765e-12	3.25428e-15	down	Gh_A11G1413	13.8901	31.4133	-1.13775	1.33839e-38	0.00441095	0.00394793	down	Gh_A09G0517	84.3908	0	7.53091	2.88e-12	4.91e-06	6.35e-53	up
Gh_A11G2110	10.4068	30.6127	-1.57523	1.59619e-40	0.000259387	4.88491e-05	down	Gh_D11G1446	13.8789	31.4358	-1.13775	1.33839e-38	0.00441095	0.00394793	down	Gh_D08G0773	98.0438	0	7.7533	2.14e-10	2.15e-06	4.46e-62	up
Gh_A12G2365	50.4198	127.072	-1.32673	2.07092e-40	2.19851e-12	2.38039e-15	down	Gh_D12G1292	13.5089	31.285	-1.13775	1.33839e-38	0.00441095	0.00394793	down	Gh_A05G2404	99.0104	0	7.76794	1.54e-12	2.04e-06	9.84e-63	up
Gh_D07G1356	13.1479	38.9301	-1.53917	1.96532e-40	3.89153e-05	4.69415e-06	down	Gh_D01G2137	36.3706	72.5452	-1.02844	4.17207e-38	2.09157e-05	6.9167e-06	down	Gh_D05G3006	106.148	0	7.86651	1.2e-12	1.42e-06	2.64e-67	up
Gh_D11G0264	12.8805	39.0651	-1.53917	1.96532e-40	3.89153e-05	4.69415e-06	down	Gh_A10G1907	28.164	58.2607	-1.056	9.68326e-39	0.000122894	6.16999e-05	down	Gh_A12G0716	122.272	0	8.06932	6.75e-13	6.47e-07	8.61e-78	up
Gh_D06G0939	59.4314	149.997	-1.32957	1.34932e-39	3.58245e-14	4.83312e-18	down	Gh_D08G1267	40.6338	83.2256	-1.02731	2.61801e-38	5.31404e-06	1.19749e-06	down	Gh_A09G1681	139.029	0	8.25753	3.79e-13	3.07e-07	5.91e-89	up
Gh_D05G0803	5.49517	17.816	-1.74029	3.67822e-41	0.00508388	0.00167413	down	Gh_D06G2337	38.0606	76.9492	-1.02795	4.21585e-39	1.19794e-05	3.36991e-06	down	Gh_A08G2251	534.207	0	10.1993	1.37e-15	5.48e-11	0	up
Gh_A07G0729	46.6511	118.086	-1.30941	1.1938e-39	1.94984e-11	5.06169e-14	down	Gh_D01G0363	19.2889	39.748	-1.07292	1.30703e-38	0.00165884	0.00131783	down	Gh_A13G1630	534.187	0	10.1993	1.37e-15	5.48e-11	0	up
Gh_A07G0083	8.35932	25.2415	-1.57523	1.36101e-40	0.00136726	0.000381735	down	Gh_A01G0969	9.21394	20.4764	-1.12806	1.67199e-38	0.0310749	0.0379757	down	Gh_D09G1727	546.443	0	10.2313	1.36e-15	4.71e-11	0	up
Gh_A12G2523	8.32202	24.581	-1.57523	1.36101e-40	0.00136726	0.000381735	down	Gh_D10G1780	49.9018	100.029	-1.01159	1.75982e-38	8.16787e-07	9.02559e-08	down	Gh_D02G1330	0	1185.84	-12.5176	6.73e-14	4.36e-16	0	down
Gh_D03G1490	7.81144	25.2648	-1.57523	1.36101e-40	0.00136726	0.000381735	down	Gh_D10G0257	23.4544	48.1124	-1.06381	8.2647e-42	0.000518306	0.000336174	down	Gh_A03G0947	0	1025.46	-12.3076	3.94e-14	1.5e-15	0	down
Gh_A10G0692	9.14103	27.8092	-1.57523	4.907e-40	0.00059857	0.000140125	down	Gh_D01G2102	33.1469	67.806	-1.05051	3.92616e-38	3.02611e-05	1.09523e-05	down	Gh_D05G0987	0	528.48	-11.3492	4.83e-17	2.82e-13	1.92e-288	down
Gh_A04G0264	12.161	35.6042	-1.53624	4.60073e-40	8.88622e-05	1.3247e-05	down	Gh_A09G0836	19.6249	41.9883	-1.07031	3.76311e-38	0.00123685	0.000941886	down	Gh_A05G0905	0	496.126	-11.2591	9.8e-18	4.54e-13	5.58e-271	down
Gh_D05G2642	10.9938	33.3379	-1.5328	2.35066e-40	0.000201791	3.78825e-05	down	Gh_A11G0371	29.5519	61.7656	-1.05359	5.33018e-38	6.96275e-05	3.08317e-05	down	Gh_D08G0476	0	473.385	-11.1906	4.16e-19	6.54e-13	2.03e-258	down
Gh_A05G1416	17.0162	48.9286	-1.49036	4.37185e-41	4.24979e-06	3.36909e-07	down	Gh_A04G1482	39.0746	77.7465	-1.00945	1.40352e-38	1.44417e-05	4.26512e-06	down	Gh_D12G0838	0	380.945	-10.877	1.05e-17	3.4e-12	6.97e-208	down
Gh_D11G0509	20.7829	57.9484	-1.4344	5.12722e-41	8.63793e-07	5.20477e-08	down	Gh_D03G1145	9.89157	21.5672	-1.11798	2.93493e-39	0.0233342	0.0274137	down	Gh_A05G0513	0	271.074	-10.3881	1.41e-11	3.98e-11	4.58e-148	down
Gh_D07G0786	28.2787	74.623	-1.39585	1.49296e-42	2.67956e-08	6.97791e-10	down	Gh_D07G2326	9.72891	22.0075	-1.11798	2.93493e-39	0.0233342	0.0274137	down	Gh_D10G1793	0	260.574	-10.3312	4.58e-10	5.22e-11	2.49e-142	down
Gh_A08G0924	29.462	76.8562	-1.38382	5.02224e-40	2.09958e-08	5.24693e-10	down	Gh_D01G2021	25.4752	51.9804	-1.06032	8.98724e-42	0.000289772	0.000171611	down	Gh_D13G0258	0	241.472	-10.2192	1.98e-11	8.91e-11	1.09e-131	down
Gh_A12G0132	13.1184	38.1848	-1.50217	6.6943e-40	6.8822e-05	1.0192e-05	down	Gh_A05G0062	10.7918	24.3802	-1.10959	5.20726e-40	0.0172238	0.0196409	down	Gh_D04G0512	0	228.269	-10.1393	6.62e-10	1.31e-10	1.36e-124	down
Gh_D13G1874	20.8385	57.1876	-1.40952	5.2939e-41	1.51085e-06	1.1004e-07	down	Gh_D02G0694	11.4149	23.6768	-1.10959	5.20726e-40	0.0172238	0.0196409	down	Gh_A13G2201	0	219.823	-10.0847	3.86e-10	1.7e-10	5.94e-120	down
Gh_A09G0635	19.1301	51.9335	-1.41913	1.27303e-39	4.4474e-06	4.02338e-07	down	Gh_D10G0507	27.5796	57.1134	-1.03112	1.00911e-38	0.000197904	0.000109385	down	Gh_A04G1052	0	203.77	-9.97572	4.37e-10	2.86e-10	3.2e-111	down
Gh_D03G0469	314.638	691.879	-1.12494	5.75371e-42	2.76242e-12	5.31815e-23	down	Gh_A13G1541	16.2969	34.3554	-1.08259	2.35568e-39	0.0040154	0.00366359	down	Gh_D05G1779	0	153.216	-9.56539	1.67e-13	1.92e-09	1.22e-83	down
Gh_A02G1051	48.2463	117.757	-1.27936	2.14597e-40	4.33156e-11	1.50171e-13	down	Gh_A13G1972	16.4771	34.0832	-1.08259	2.35568e-39	0.0040154	0.00366359	down	Gh_A03G0626	0	117.707	-9.18593	1.14e-08	1.02e-08	2.88e-64	down
Gh_A11G1242	28.1499	74.0501	-1.37661	3.76788e-40	4.62313e-08	1.45382e-09	down	Gh_A02G1231	33.6874	68.1878	-1.00807	1.64744e-39	5.8167e-05	2.43734e-05	down	Gh_D04G1629	0	113.206	-9.12984	4.55e-09	1.3e-08	7.94e-62	down
Gh_A08G0792	6.37144	18.8401	-1.57523	1.35877e-40	0.00698057	0.00303187	down	Gh_A11G0440	11.9326	26.2422	-1.10251	2.20465e-40	0.0129203	0.0140498	down	Gh_D07G1291	0	97.7423	-8.918	1.37e-12	3.21e-08	2.22e-53	down
Gh_A11G0821	6.43752	18.5782	-1.57523	1.35877e-40	0.00698057	0.00303187	down	Gh_D08G0751	11.5623	26.3073	-1.10251	2.20465e-40	0.0129203	0.0140498	down	Gh_A13G0060	0	87.77	-8.76272	2.78e-08	6.2e-08	6.51e-48	down
Gh_D12G1648	6.37526	19.2846	-1.57523	1.35877e-40	0.00698057	0.00303187	down	Gh_D10G0084	17.4388	35.8237	-1.079	7.62021e-42	0.00300429	0.0026109	down	Gh_A07G0191	0	85.3062	-8.72114	1.98e-09	7.35e-08	1.51e-46	down
Gh_D07G1405	4.12169	15.3481	-1.77453	2.43772e-40	0.0112596	0.00465056	down	Gh_A02G1055	17.5267	36.7765	-1.03783	2.37802e-39	0.00362397	0.00329228	down	Gh_D05G1434	0	78.1809	-8.59791	7.32e-08	1.22e-07	1.01e-42	down
Gh_D08G2601	3.88145	15.3744	-1.77453	2.43772e-40	0.0112596	0.00465056	down	Gh_A04G1089	18.3538	36.7809	-1.03783	2.37802e-39	0.00362397	0.00329228	down	Gh_D02G0974	0	70.5392	-8.45304	6.65e-10	2.2e-07	1.2e-38	down
Gh_D09G0737	4.30455	15.1814	-1.77453	2.43772e-40	0.0112596	0.00465056	down	Gh_A09G0479	17.8163	37.204	-1.03783	2.37802e-39	0.00362397	0.00329228	down	Gh_A03G2167	0	67.3809	-8.38011	5.6e-12	2.94e-07	9.89e-37	down
Gh_D11G0937	3.63696	14.6294	-1.77453	2.43772e-40	0.0112596	0.00465056	down	Gh_D12G1342	18.3077	37.047	-1.03783	2.37802e-39	0.00362397	0.00329228	down	Gh_A10G1546	0	66.8366	-8.36938	5.98e-08	3.06e-07	1.84e-36	down
Gh_D11G1011	4.16482	15.1402	-1.77453	2.43772e-40	0.0112596	0.00465056	down	Gh_A02G0138	13.1632	27.6579	-1.09645	8.47534e-39	0.0096872	0.010069	down	Gh_A11G0893	0	65.6505	-8.34769	2.54e-08	3.32e-07	6.5e-36	down
Gh_A01G0705	23.1007	62.3935	-1.4015	1.37212e-40	5.04094e-07	2.88332e-08	down	Gh_D05G1440	18.9722	38.6004	-1.03684	2.42677e-39	0.00271138	0.00234804	down	Gh_D13G2506	0	60.6226	-8.23403	3.23e-08	5.22e-07	3.36e-33	down
Gh_A03G1923	3.45428	12.0444	-1.82676	1.74344e-40	0.0248728	0.0126218	down	Gh_D07G0894	18.7119	39.2314	-1.03684	2.42677e-39	0.00271138	0.00234804	down	Gh_A05G0828	0	60.0788	-8.22216	2.76e-08	5.46e-07	6.29e-33	down
Gh_A05G0742	3.00737	12.1886	-1.82676	1.74344e-40	0.0248728	0.0126218	down	Gh_D01G1546	19.6939	41.2907	-1.03596	3.99404e-38	0.00201907	0.00166895	down	Gh_D03G0931	0	58.5944	-8.18594	9.01e-12	6.31e-07	4.07e-32	down
Gh_A10G0352	2.98443	11.6638	-1.82676	1.74344e-40	0.0248728	0.0126218	down	Gh_A05G3696	14.7364	31.6434	-1.08662	7.98675e-42	0.00536274	0.00509132	down	Gh_A05G3800	0	55.5127	-8.11065	1.03e-07	8.41e-07	1.75e-30	down
Gh_A11G0120	3.08743	11.6461	-1.82676	1.74344e-40	0.0248728	0.0126218	down	Gh_D04G1908	31.6002	63.8205	-1.0074	3.84049e-39	0.000100062	4.86895e-05	down	Gh_D09G1402	0	54.6453	-8.08465	1.2e-11	9.28e-07	6.15e-30	down
Gh_A11G1615	3.12303	12.1317	-1.82676	1.74344e-40	0.0248728	0.0126218	down	Gh_D07G0457	23.0078	45.9447	-1.00305	2.85145e-39	0.00133486	0.00105174	down	Gh_A13G1914	0	47.3982	-7.87315	2.83e-08	2.08e-06	7.41e-26	down
Gh_D03G1146	3.37092	12.3499	-1.82676	1.74344e-40	0.0248728	0.0126218	down	Gh_A08G0348	16.4153	32.6942	-1.04015	8.07673e-39	0.00650169	0.00646668	down	Gh_D08G0407	0	43.1506	-7.74624	7.21e-08	3.32e-06	1.13e-23	down
Gh_D05G2333	2.84605	12.2327	-1.82676	1.74344e-40	0.0248728	0.0126218	down	Gh_A13G0851	15.6538	32.9623	-1.04015	8.07673e-39	0.00650169	0.00646668	down	Gh_A01G0673	0	39.7494	-7.62522	3.38e-09	5.18e-06	8.92e-22	down
Gh_D07G1195	3.19183	11.8742	-1.82676	1.74344e-40	0.0248728	0.0126218	down	Gh_D13G1902	15.6502	32.9635	-1.04015	8.07673e-39	0.00650169	0.00646668	down	Gh_A04G1102	0	34.6349	-7.43258	1.62e-07	1.04e-05	4.58e-19	down
Gh_D09G1105	2.6713	12.1917	-1.82676	1.74344e-40	0.0248728	0.0126218	down	Gh_A02G1729	17.4842	35.2195	-1.03892	8.07579e-39	0.0048207	0.00460458	down	Gh_A06G1586	0	34.6564	-7.43258	1.62e-07	1.04e-05	4.58e-19	down
Gh_D10G0875	3.28935	11.5317	-1.82676	1.74344e-40	0.0248728	0.0126218	down	Gh_D11G0181	16.9978	34.6932	-1.03892	8.07579e-39	0.0048207	0.00460458	down	Gh_A13G2109	0	34.1558	-7.41182	1.42e-07	1.12e-05	8.59e-19	down
Gh_D12G1687	3.05727	12.0694	-1.82676	1.74344e-40	0.0248728	0.0126218	down	Gh_D05G3139	10.1198	21.4852	-1.05239	3.42623e-39	0.0377119	0.0485363	down	Gh_A05G3015	0	33.2785	-7.36938	1.55e-07	1.3e-05	3.02e-18	down
Gh_A10G0249	12.3419	35.3385	-1.49616	1.98367e-40	0.000155837	2.89253e-05	down	Gh_D06G0031	10.1375	20.9068	-1.05239	3.42623e-39	0.0377119	0.0485363	down	Gh_D07G2096	0	31.8505	-7.30329	2.14e-07	1.63e-05	1.92e-17	down
Gh_A03G0649	8.92036	27.0626	-1.5237	2.7885e-41	0.00106229	0.000297391	down	Gh_D06G2365	9.68493	20.6318	-1.05239	3.42623e-39	0.0377119	0.0485363	down	Gh_D10G0095	0	31.8423	-7.30329	2.14e-07	1.63e-05	1.92e-17	down
Gh_D01G1044	128.194	289.505	-1.16829	1.60048e-40	2.70156e-14	1.8977e-24	down	Gh_D13G0107	10.2069	20.7715	-1.05239	3.42623e-39	0.0377119	0.0485363	down	Gh_D07G2318	0	30.5538	-7.25749	5.92e-07	1.9e-05	6.67e-17	down
Gh_D03G0651	24.5945	65.215	-1.35131	1.63303e-39	5.18837e-07	3.25956e-08	down	Gh_A09G2003	21.564	43.7667	-1.00236	8.97177e-39	0.00179016	0.0014732	down	Gh_A12G2252	0	29.0031	-7.18594	4.38e-08	2.44e-05	4.37e-16	down
Gh_D08G1232	8.11587	23.9159	-1.51751	5.98249e-41	0.00242174	0.000830093	down	Gh_D06G2392	21.5357	43.6991	-1.00236	8.97177e-39	0.00179016	0.0014732	down	Gh_D08G2335	0	29.0345	-7.18594	4.38e-08	2.44e-05	4.37e-16	down
Gh_A01G0898	12.9257	36.8956	-1.4642	7.02506e-40	0.000120257	2.18191e-05	down	Gh_A08G1083	11.0883	22.9672	-1.04947	5.9732e-40	0.028158	0.0348269	down	Gh_A01G0780	0	28.2794	-7.13618	2.5e-07	2.88e-05	1.51e-15	down
Gh_A01G1664	13.2033	36.6106	-1.4642	7.02506e-40	0.000120257	2.18191e-05	down	Gh_A10G1712	11.043	22.9922	-1.04947	5.9732e-40	0.028158	0.0348269	down	Gh_A08G2292	0	27.696	-7.11065	5.31e-08	3.13e-05	2.83e-15	down
Gh_A11G2997	12.5224	37.1956	-1.4642	7.02506e-40	0.000120257	2.18191e-05	down	Gh_A09G1283	11.6444	25.359	-1.04701	5.82699e-39	0.0209537	0.0249192	down	Gh_A02G1311	0	26.1749	-7.03122	3.71e-07	4.11e-05	1.84e-14	down
Gh_D08G2126	35.4855	89.0725	-1.32445	5.98656e-40	4.59199e-09	7.96086e-11	down	Gh_A12G1171	12.062	25.3165	-1.04701	5.82699e-39	0.0209537	0.0249192	down	Gh_A05G2607	0	25.4711	-6.97572	4.2e-07	4.95e-05	6.35e-14	down
Gh_A13G1359	21.1922	55.8498	-1.38421	5.55737e-41	2.63957e-06	2.2494e-07	down	Gh_A11G0695	13.373	26.9756	-1.04492	9.45128e-39	0.0154705	0.0178127	down	Gh_A10G1350	0	25.4135	-6.97572	4.2e-07	4.95e-05	6.35e-14	down
Gh_D12G1776	44.0786	107.114	-1.26292	2.18543e-40	5.05747e-10	4.26785e-12	down	Gh_A03G0331	14.0301	28.7507	-1.04311	2.82825e-39	0.0116569	0.0127567	down	Gh_D02G1239	0	24.6141	-6.94715	3.69e-07	5.43e-05	1.18e-13	down
Gh_D12G1452	34.8954	87.6145	-1.30823	1.91914e-40	7.83406e-09	1.62077e-10	down	Gh_A12G1876	14.7257	30.7107	-1.04153	8.58979e-39	0.00874779	0.00913315	down	Gh_A07G1035	0	23.9156	-6.88826	1.68e-10	6.6e-05	4.11e-13	down
Gh_D11G1602	30.6608	78.8383	-1.32595	1.05522e-39	3.71877e-08	1.18745e-09	down									Gh_D12G0710	0	23.9032	-6.88826	1.68e-10	6.6e-05	4.11e-13	down
Gh_A05G1718	7.32375	21.3309	-1.50964	1.29608e-40	0.00546611	0.002346	down									Gh_A03G0441	0	23.393	-6.85788	1.33e-06	7.27e-05	7.7e-13	down
Gh_A05G3948	7.06056	21.021	-1.50964	1.29608e-40	0.00546611	0.002346	down									Gh_A01G1206	0	21.7087	-6.76273	6.33e-07	9.93e-05	5.04e-12	down
Gh_D11G2680	6.78713	21.1692	-1.50964	1.29608e-40	0.00546611	0.002346	down									Gh_D03G0449	0	21.7776	-6.76273	6.33e-07	9.93e-05	5.04e-12	down
Gh_A02G0455	25.0041	63.4069	-1.30656	5.05519e-40	1.57265e-06	1.35484e-07	down									Gh_D11G3466	0	20.8073	-6.69561	7.34e-07	0.000122822	1.75e-11	down
Gh_D13G0211	50.8305	118.506	-1.20489	2.43431e-40	2.80988e-10	1.69233e-12	down									Gh_D11G1307	0	20.3171	-6.66085	6.65e-07	0.000137358	3.23e-11	down
Gh_A01G0149	15.4657	41.3157	-1.41112	3.42118e-40	7.15792e-05	1.22605e-05	down									Gh_A07G1273	0	19.7844	-6.62522	8.59e-07	0.000152671	5.94e-11	down
Gh_D08G1128	35.9392	87.5744	-1.26816	1.9935e-40	1.77693e-08	4.84844e-10	down									Gh_A10G1561	0	19.7952	-6.62522	8.59e-07	0.000152671	5.94e-11	down
Gh_A03G0210	8.71353	26.2273	-1.47026	2.96981e-41	0.00186603	0.000636922	down									Gh_D01G0589	0	19.7018	-6.62522	8.59e-07	0.000152671	5.94e-11	down
Gh_A06G0991	8.89295	26.1702	-1.47026	2.96981e-41	0.00186603	0.000636922	down									Gh_D03G0789	0	19.648	-6.62522	8.59e-07	0.000152671	5.94e-11	down
Gh_A11G2049	6.21958	17.6098	-1.49928	1.89742e-41	0.0121067	0.00655142	down									Gh_D05G0280	0	19.7785	-6.62522	8.59e-07	0.000152671	5.94e-11	down
Gh_D01G1622	6.43721	17.6138	-1.49928	1.89742e-41	0.0121067	0.00655142	down									Gh_D11G2558	0	19.6484	-6.62522	8.59e-07	0.000152671	5.94e-11	down
Gh_D07G1980	5.9818	18.0639	-1.49928	1.89742e-41	0.0121067	0.00655142	down									Gh_A03G1217	0	19.098	-6.5887	1.49e-07	0.000171741	1.11e-10	down
Gh_D12G0040	6.32173	18.1615	-1.49928	1.89742e-41	0.0121067	0.00655142	down									Gh_A12G1484	0	19.4283	-6.5887	1.49e-07	0.000171741	1.11e-10	down
Gh_D13G2216	5.75421	17.5104	-1.49928	1.89742e-41	0.0121067	0.00655142	down									Gh_D06G0660	0	18.5985	-6.55122	2.44e-06	0.000192218	2.05e-10	down
Gh_D08G1739	11.0017	31.0979	-1.44399	9.24312e-40	0.000631606	0.00017753	down									Gh_D13G0447	0	18.4433	-6.51275	9.08e-07	0.000215481	3.81e-10	down
Gh_D06G0713	5.01132	17.2217	-1.66012	1.31299e-40	0.00888991	0.00383719	down									Gh_A06G0790	0	16.5655	-6.39076	3.66e-06	0.00031429	2.45e-09	down
Gh_D08G2448	5.27648	16.9386	-1.66012	1.31299e-40	0.00888991	0.00383719	down									Gh_A08G0356	0.387092	16.5862	-6.39076	3.66e-06	0.00031429	2.45e-09	down
Gh_A01G1425	12.8258	35.6857	-1.42521	9.63868e-41	0.000210692	4.64627e-05	down									Gh_D06G1757	0	16.4821	-6.34769	2.5e-07	0.000357489	4.6e-09	down
Gh_D05G0111	7.5418	23.0282	-1.45739	5.01061e-40	0.00423943	0.00179366	down									Gh_D02G2031	5.71809	166.581	-4.65938	4.87e-09	6.87e-26	2.26e-72	down
Gh_D10G1761	7.75831	22.6034	-1.45739	5.01061e-40	0.00423943	0.00179366	down									Gh_A05G3497	0	15.6115	-6.3033	2.85e-06	0.000409213	8.52e-09	down
Gh_A06G0687	189.215	419.306	-1.13771	1.64486e-39	1.89081e-12	1.38384e-25	down									Gh_D09G2249	0	15.968	-6.3033	2.85e-06	0.000409213	8.52e-09	down
Gh_D02G0911	13.5443	37.5071	-1.39908	1.03932e-40	0.000161658	3.46021e-05	down									Gh_D09G1517	0	15.3521	-6.25749	8.33e-07	0.000466321	1.59e-08	down
Gh_D02G0507	25.1743	62.2139	-1.28366	1.6332e-42	2.70149e-06	2.69208e-07	down									Gh_A12G0728	0	14.5202	-6.21019	3.58e-07	0.000535721	2.92e-08	down
Gh_D02G1645	95.559	209.227	-1.10953	2.14154e-39	6.77102e-13	3.37699e-18	down									Gh_D03G1364	0	14.9122	-6.21019	3.58e-07	0.000535721	2.92e-08	down
Gh_A03G0597	3.86773	13.8419	-1.67832	1.43852e-41	0.0198306	0.0106237	down									Gh_D06G1632	0	14.9931	-6.21019	3.58e-07	0.000535721	2.92e-08	down
Gh_D05G3782	3.91381	14.2022	-1.67832	1.43852e-41	0.0198306	0.0106237	down									Gh_D11G2212	0	14.7659	-6.21019	3.58e-07	0.000535721	2.92e-08	down
Gh_D05G0426	39.5042	95.0737	-1.22798	7.21216e-40	1.08291e-08	2.53597e-10	down									Gh_D13G1674	0	14.8256	-6.21019	3.58e-07	0.000535721	2.92e-08	down
Gh_A11G3057	10.2213	27.9791	-1.43084	1.95473e-40	0.00143808	0.000479451	down									Gh_A08G2571	0	14.0601	-6.16128	5.56e-06	0.000620102	5.46e-08	down
Gh_D07G0559	9.5428	28.3871	-1.43084	1.95473e-40	0.00143808	0.000479451	down									Gh_D07G0846	0	14.0701	-6.16128	5.56e-06	0.000620102	5.46e-08	down
Gh_A02G0836	18.1698	45.8843	-1.31998	3.12037e-40	5.60808e-05	1.01307e-05	down									Gh_D12G0084	0	14.305	-6.16128	5.56e-06	0.000620102	5.46e-08	down
Gh_D06G1180	15.1847	40.1922	-1.37593	3.67215e-40	0.000123985	2.56059e-05	down									Gh_A08G0041	0	13.6732	-6.11065	4.46e-07	0.000720186	1.01e-07	down
Gh_D02G2139	69.9177	158.461	-1.15959	7.60038e-40	4.8561e-12	2.23938e-15	down									Gh_A12G2583	0	13.5489	-6.11065	4.46e-07	0.000720186	1.01e-07	down
Gh_A09G0242	13.2876	35.3918	-1.38513	6.0036e-40	0.000368662	9.87029e-05	down									Gh_D04G0129	0	13.5106	-6.11065	4.46e-07	0.000720186	1.01e-07	down
Gh_A13G0998	10.786	29.6817	-1.39744	8.89446e-41	0.00110136	0.00035685	down									Gh_D09G2122	7.95121	186.593	-4.40754	6.79e-05	1.07e-30	2.94e-78	down
Gh_D07G2204	11.353	29.9597	-1.39744	8.89446e-41	0.00110136	0.00035685	down									Gh_A03G1776	0	12.8249	-6.00374	5.64e-07	0.000984325	3.45e-07	down
Gh_D04G1558	21.5668	55.0897	-1.29285	6.61902e-41	1.06222e-05	1.39603e-06	down									Gh_A09G2155	0	12.6625	-6.00374	5.64e-07	0.000984325	3.45e-07	down
Gh_D02G2156	26.147	63.3131	-1.25107	1.95051e-39	3.51948e-06	3.79971e-07	down									Gh_A11G0159	0	12.5836	-6.00374	5.64e-07	0.000984325	3.45e-07	down
Gh_D02G0752	15.6326	41.5242	-1.35527	3.92207e-40	9.51787e-05	1.8827e-05	down									Gh_A12G1170	0	12.9813	-6.00374	5.64e-07	0.000984325	3.45e-07	down
Gh_D03G1371	8.97486	24.542	-1.41476	3.1682e-41	0.00326345	0.00134412	down									Gh_D08G1074	0	12.5489	-6.00374	5.64e-07	0.000984325	3.45e-07	down
Gh_A12G1838	56.8205	127.423	-1.13944	2.84159e-40	5.3094e-10	3.15623e-12	down									Gh_D01G1169	0	12.4917	-5.94715	3.61e-06	0.00114901	6.41e-07	down
Gh_A03G1281	2.75616	10.9842	-1.70647	1.06507e-41	0.0437408	0.0286359	down									Gh_D08G2162	0	12.3497	-5.94715	3.61e-06	0.00114901	6.41e-07	down
Gh_A05G1849	3.43421	11.2035	-1.70647	1.06507e-41	0.0437408	0.0286359	down									Gh_A03G1399	0	11.6708	-5.88826	3.41e-06	0.00135279	1.19e-06	down
Gh_A07G0022	3.24094	11.1002	-1.70647	1.06507e-41	0.0437408	0.0286359	down									Gh_A09G0618	0	11.5357	-5.88826	3.41e-06	0.00135279	1.19e-06	down
Gh_A09G1388	2.74572	10.539	-1.70647	1.06507e-41	0.0437408	0.0286359	down									Gh_D02G1838	0	11.5419	-5.88826	3.41e-06	0.00135279	1.19e-06	down
Gh_A11G0263	2.55599	10.8244	-1.70647	1.06507e-41	0.0437408	0.0286359	down									Gh_D06G0202	0	11.5332	-5.88826	3.41e-06	0.00135279	1.19e-06	down
Gh_A11G2133	3.12445	10.9883	-1.70647	1.06507e-41	0.0437408	0.0286359	down									Gh_A02G0060	0	11.4492	-5.82686	1.18e-05	0.00159428	2.22e-06	down
Gh_A11G3179	3.46174	10.5382	-1.70647	1.06507e-41	0.0437408	0.0286359	down									Gh_A05G0468	0	11.4432	-5.82686	1.18e-05	0.00159428	2.22e-06	down
Gh_D03G0321	3.0571	11.4621	-1.70647	1.06507e-41	0.0437408	0.0286359	down									Gh_D11G0999	0	11.1181	-5.82686	1.18e-05	0.00159428	2.22e-06	down
Gh_D05G1875	2.94344	10.925	-1.70647	1.06507e-41	0.0437408	0.0286359	down									Gh_D11G3235	0	11.2135	-5.82686	1.18e-05	0.00159428	2.22e-06	down
Gh_D06G0795	13.522	37.4529	-1.36111	1.09539e-40	0.000281329	7.24195e-05	down									Gh_A03G0592	0	10.9564	-5.76273	1.77e-09	0.00189676	4.1e-06	down
Gh_D05G1596	292.804	591.866	-1.0042	2.87244e-40	6.44022e-10	3.32877e-19	down									Gh_A08G2392	0	10.9133	-5.76273	1.77e-09	0.00189676	4.1e-06	down
Gh_A09G2480	6.87736	19.9707	-1.44093	2.41428e-41	0.0094463	0.00501492	down									Gh_A09G0732	0	10.591	-5.76273	1.77e-09	0.00189676	4.1e-06	down
Gh_D01G2010	7.35376	19.887	-1.44093	2.41428e-41	0.0094463	0.00501492	down									Gh_A11G0857	0	10.7743	-5.76273	1.77e-09	0.00189676	4.1e-06	down
Gh_A03G1743	20.2004	49.9069	-1.29094	1.47697e-40	3.24781e-05	5.39007e-06	down									Gh_D01G1188	0	10.9572	-5.76273	1.77e-09	0.00189676	4.1e-06	down
Gh_D02G1428	66.4667	146.134	-1.13018	1.32623e-40	5.68494e-11	9.34809e-14	down									Gh_D12G0510	0	10.7474	-5.76273	1.77e-09	0.00189676	4.1e-06	down
Gh_D13G1246	18.4482	45.032	-1.28862	4.34324e-40	9.51787e-05	2.03542e-05	down									Gh_D12G0523	9.27508	168.276	-4.08732	9.56e-06	2.18e-29	6.65e-67	down
Gh_A10G0796	8.20729	22.4178	-1.39466	1.14594e-39	0.00725943	0.00374547	down									Gh_A07G1975	0	10.425	-5.69561	2.99e-05	0.0022716	7.62e-06	down
Gh_D05G0068	7.7945	22.1482	-1.39466	1.14594e-39	0.00725943	0.00374547	down									Gh_D06G1342	0	10.4838	-5.69561	2.99e-05	0.0022716	7.62e-06	down
Gh_D11G0511	7.87487	21.917	-1.39466	1.14594e-39	0.00725943	0.00374547	down									Gh_D08G2297	0.685712	27.2475	-4.64199	2.03e-05	0.000202717	6.26e-12	down
Gh_A13G0147	15.7972	41.0238	-1.32092	1.28016e-40	0.000163328	3.86889e-05	down									Gh_A01G0611	1.04348	26.7311	-4.61552	1.73e-05	0.000226054	1.12e-11	down
Gh_A05G2086	12.8846	33.6148	-1.34391	2.08081e-39	0.000642714	0.000200806	down									Gh_D12G1184	2.26493	42.6108	-4.2869	6.06e-05	2.6e-07	1.15e-17	down
Gh_A06G0706	13.3801	34.1449	-1.34391	2.08081e-39	0.000642714	0.000200806	down									Gh_A01G1006	0	9.73354	-5.62523	1.32e-06	0.00272192	1.4e-05	down
Gh_D05G2708	56.3525	121.587	-1.107	1.24606e-40	2.76074e-09	2.94899e-11	down									Gh_A09G1654	0	9.96622	-5.62523	1.32e-06	0.00272192	1.4e-05	down
Gh_A12G1559	9.89748	27.1625	-1.37931	8.6494e-41	0.00250046	0.00099687	down									Gh_D03G0878	0	9.59773	-5.62523	1.32e-06	0.00272192	1.4e-05	down
Gh_D08G1166	10.037	26.8214	-1.37931	8.6494e-41	0.00250046	0.00099687	down									Gh_D04G0772	0	9.84955	-5.62523	1.32e-06	0.00272192	1.4e-05	down
Gh_A05G1444	18.6722	46.5005	-1.27473	1.61167e-39	7.25007e-05	1.47432e-05	down									Gh_D04G0821	0	9.7227	-5.62523	1.32e-06	0.00272192	1.4e-05	down
Gh_D09G1432	64.1677	137.777	-1.09316	1.03215e-39	5.05706e-10	2.07692e-12	down									Gh_D07G2115	0.398891	9.82684	-5.62523	1.32e-06	0.00272192	1.4e-05	down
Gh_A07G1742	5.48318	16.3774	-1.57523	4.45197e-41	0.0156208	0.00845544	down									Gh_D08G2375	0	9.76373	-5.62523	1.32e-06	0.00272192	1.4e-05	down
Gh_D03G0256	4.86568	16.4431	-1.57523	4.45197e-41	0.0156208	0.00845544	down									Gh_D12G1384	0	9.55762	-5.62523	1.32e-06	0.00272192	1.4e-05	down
Gh_D04G0242	5.0475	16.4587	-1.57523	4.45197e-41	0.0156208	0.00845544	down									Gh_A08G0378	0	9.10232	-5.55123	2.21e-05	0.00331049	2.61e-05	down
Gh_D12G2112	4.72899	15.8655	-1.57523	4.45197e-41	0.0156208	0.00845544	down									Gh_A09G1212	0	9.05252	-5.55123	2.21e-05	0.00331049	2.61e-05	down
Gh_A09G0003	15.4007	38.0548	-1.30286	5.34341e-41	0.000370548	0.000108126	down									Gh_A11G0926	1.03515	23.9637	-4.4456	7.73e-09	0.000465087	3.63e-10	down
Gh_A04G0160	23.0812	54.5685	-1.23012	7.59781e-41	2.41277e-05	4.00252e-06	down									Gh_A01G1101	0	8.74913	-5.47322	1.86e-06	0.00403214	4.77e-05	down
Gh_D10G1431	100.749	207.064	-1.02274	1.82723e-40	3.11251e-11	7.58578e-16	down									Gh_A08G0983	0	8.66953	-5.47322	1.86e-06	0.00403214	4.77e-05	down
Gh_A09G0100	5.86246	16.6595	-1.41911	5.04013e-43	0.0208363	0.0135274	down									Gh_A08G2449	0	8.69272	-5.47322	1.86e-06	0.00403214	4.77e-05	down
Gh_A10G0114	6.3169	17.094	-1.41911	5.04013e-43	0.0208363	0.0135274	down									Gh_A10G1168	0	8.56478	-5.47322	1.86e-06	0.00403214	4.77e-05	down
Gh_D02G0754	5.9867	16.581	-1.41911	5.04013e-43	0.0208363	0.0135274	down									Gh_A13G0669	0	8.66143	-5.47322	1.86e-06	0.00403214	4.77e-05	down
Gh_D03G1452	5.7281	17.17	-1.41911	5.04013e-43	0.0208363	0.0135274	down									Gh_D04G1155	0	8.71534	-5.47322	1.86e-06	0.00403214	4.77e-05	down
Gh_D06G2148	6.01052	17.3117	-1.41911	5.04013e-43	0.0208363	0.0135274	down									Gh_D05G2109	0	8.62797	-5.47322	1.86e-06	0.00403214	4.77e-05	down
Gh_D11G0927	5.52887	16.848	-1.41911	5.04013e-43	0.0208363	0.0135274	down									Gh_D05G2162	0.20135	8.72638	-5.47322	1.86e-06	0.00403214	4.77e-05	down
Gh_D11G1083	6.32319	16.9213	-1.41911	5.04013e-43	0.0208363	0.0135274	down									Gh_D05G3905	0	8.53525	-5.47322	1.86e-06	0.00403214	4.77e-05	down
Gh_D11G1760	11.7873	31.0266	-1.32369	2.7396e-39	0.00145646	0.00054019	down									Gh_D08G2589	0	8.78712	-5.47322	1.86e-06	0.00403214	4.77e-05	down
Gh_D13G0168	12.395	30.8385	-1.32369	2.7396e-39	0.00145646	0.00054019	down									Gh_D09G2041	0	8.97768	-5.47322	1.86e-06	0.00403214	4.77e-05	down
Gh_D03G0437	13.2907	32.5639	-1.30147	1.1467e-40	0.00110759	0.000394198	down									Gh_A01G0510	0	8.44875	-5.39076	3.22e-05	0.00494013	8.77e-05	down
Gh_A01G0186	7.4391	18.7748	-1.36878	6.12551e-43	0.0161443	0.010273	down									Gh_A03G1768	0	8.07123	-5.39076	3.22e-05	0.00494013	8.77e-05	down
Gh_A12G0712	6.80027	19.4701	-1.36878	6.12551e-43	0.0161443	0.010273	down									Gh_A05G0781	0	8.07075	-5.39076	3.22e-05	0.00494013	8.77e-05	down
Gh_A03G0129	3.68206	13.0833	-1.57523	6.45517e-40	0.0341224	0.0229296	down									Gh_A10G1476	0	8.16706	-5.39076	3.22e-05	0.00494013	8.77e-05	down
Gh_A08G1012	3.88581	13.3156	-1.57523	6.45517e-40	0.0341224	0.0229296	down									Gh_A13G0123	0.499068	8.36352	-5.39076	3.22e-05	0.00494013	8.77e-05	down
Gh_A09G2254	4.285	13.448	-1.57523	6.45517e-40	0.0341224	0.0229296	down									Gh_D04G1083	0	8.48789	-5.39076	3.22e-05	0.00494013	8.77e-05	down
Gh_A12G0535	4.41744	12.5488	-1.57523	6.45517e-40	0.0341224	0.0229296	down									Gh_D05G2671	0	8.11084	-5.39076	3.22e-05	0.00494013	8.77e-05	down
Gh_A12G1853	3.50407	12.9107	-1.57523	6.45517e-40	0.0341224	0.0229296	down									Gh_D08G1674	0	8.28084	-5.39076	3.22e-05	0.00494013	8.77e-05	down
Gh_D12G2421	3.96526	13.2653	-1.57523	6.45517e-40	0.0341224	0.0229296	down									Gh_A02G1567	0	7.65507	-5.3033	2.76e-06	0.00613093	0.000160261	down
Gh_D13G0071	3.56486	13.2064	-1.57523	6.45517e-40	0.0341224	0.0229296	down									Gh_A03G1439	0	7.54832	-5.3033	2.76e-06	0.00613093	0.000160261	down
Gh_D13G2139	4.46058	13.3061	-1.57523	6.45517e-40	0.0341224	0.0229296	down									Gh_A06G0533	0	7.77655	-5.3033	2.76e-06	0.00613093	0.000160261	down
Gh_A02G0434	30.2574	68.8325	-1.17852	5.38235e-40	3.36519e-06	3.8006e-07	down									Gh_A11G1440	0	7.6869	-5.3033	2.76e-06	0.00613093	0.000160261	down
Gh_A02G1506	16.0555	39.858	-1.28573	1.37171e-42	0.000281329	7.82342e-05	down									Gh_A12G2446	0	7.80794	-5.3033	2.76e-06	0.00613093	0.000160261	down
Gh_A13G2343	85.8094	177.162	-1.02796	1.72209e-40	1.15095e-10	4.53727e-14	down									Gh_D01G0711	0	7.54464	-5.3033	2.76e-06	0.00613093	0.000160261	down
Gh_A05G1382	22.4723	51.602	-1.21268	7.59556e-41	5.44681e-05	1.08561e-05	down									Gh_D01G1482	0.232508	7.73429	-5.3033	2.76e-06	0.00613093	0.000160261	down
Gh_D01G2021	21.9607	51.9804	-1.21268	7.59556e-41	5.44681e-05	1.08561e-05	down									Gh_D03G0995	0	7.62966	-5.3033	2.76e-06	0.00613093	0.000160261	down
Gh_A07G2014	9.76279	25.7475	-1.32587	3.91733e-41	0.00431207	0.00203804	down									Gh_D06G1124	0	7.8414	-5.3033	2.76e-06	0.00613093	0.000160261	down
Gh_A08G2417	9.95933	25.5967	-1.32587	3.91733e-41	0.00431207	0.00203804	down									Gh_D09G0380	0	7.98526	-5.3033	2.76e-06	0.00613093	0.000160261	down
Gh_D01G1346	10.2172	26.1585	-1.32587	3.91733e-41	0.00431207	0.00203804	down									Gh_D09G1218	0	7.54279	-5.3033	2.76e-06	0.00613093	0.000160261	down
Gh_A11G0179	13.891	35.0464	-1.28204	7.45031e-40	0.000837361	0.000289688	down									Gh_D09G1865	0	7.5318	-5.3033	2.76e-06	0.00613093	0.000160261	down
Gh_A06G0917	15.3227	37.1966	-1.26489	1.34271e-40	0.000639468	0.000212334	down									Gh_D09G2331	0	7.5825	-5.3033	2.76e-06	0.00613093	0.000160261	down
Gh_A05G3802	21.9128	50.5662	-1.18493	1.10945e-39	9.01946e-05	2.10011e-05	down									Gh_D10G0122	0	7.81623	-5.3033	2.76e-06	0.00613093	0.000160261	down
Gh_D05G3139	8.20499	21.4852	-1.32907	8.39436e-40	0.0123824	0.00760413	down									Gh_A01G1110	0	7.3142	-5.21019	1.76e-05	0.00768493	0.000292179	down
Gh_D10G1316	8.36204	21.248	-1.32907	8.39436e-40	0.0123824	0.00760413	down									Gh_A01G1290	0	7.463	-5.21019	1.76e-05	0.00768493	0.000292179	down
Gh_A07G1291	9.11578	23.232	-1.29693	6.83982e-40	0.00954511	0.00554385	down									Gh_A08G2223	0	7.44257	-5.21019	1.76e-05	0.00768493	0.000292179	down
Gh_A10G0020	8.51412	22.9223	-1.29693	6.83982e-40	0.00954511	0.00554385	down									Gh_A11G1625	0	7.41311	-5.21019	1.76e-05	0.00768493	0.000292179	down
Gh_A13G0627	9.12482	23.3069	-1.29693	6.83982e-40	0.00954511	0.00554385	down									Gh_A11G3193	0	7.25912	-5.21019	1.76e-05	0.00768493	0.000292179	down
Gh_A07G2342	11.7419	30.2685	-1.27715	6.70649e-40	0.00250046	0.00107891	down									Gh_D04G1596	0	7.19601	-5.21019	1.76e-05	0.00768493	0.000292179	down
Gh_D05G3506	11.674	29.6737	-1.27715	6.70649e-40	0.00250046	0.00107891	down									Gh_D05G3608	0	7.27297	-5.21019	1.76e-05	0.00768493	0.000292179	down
Gh_A11G2972	22.7142	52.9593	-1.17716	1.35598e-39	6.87025e-05	1.49751e-05	down									Gh_D06G0673	0	7.23968	-5.21019	1.76e-05	0.00768493	0.000292179	down
Gh_A04G1295	4.69162	14.5303	-1.48503	8.33924e-40	0.0266484	0.017807	down									Gh_D06G1015	0	7.22335	-5.21019	1.76e-05	0.00768493	0.000292179	down
Gh_A05G0054	4.97737	15.2842	-1.48503	8.33924e-40	0.0266484	0.017807	down									Gh_D11G1068	1.06209	19.419	-4.14604	4.68e-06	0.00153931	6.45e-08	down
Gh_A10G1309	5.11949	15.2218	-1.48503	8.33924e-40	0.0266484	0.017807	down									Gh_A01G0088	0	6.65948	-5.11065	2.2e-05	0.00972352	0.000527547	down
Gh_D02G0804	5.04654	15.2457	-1.48503	8.33924e-40	0.0266484	0.017807	down									Gh_A01G1738	0	6.99512	-5.11065	2.2e-05	0.00972352	0.000527547	down
Gh_D02G1973	4.51446	14.604	-1.48503	8.33924e-40	0.0266484	0.017807	down									Gh_A04G0004	0	6.68038	-5.11065	2.2e-05	0.00972352	0.000527547	down
Gh_D03G1188	5.42502	14.9067	-1.48503	8.33924e-40	0.0266484	0.017807	down									Gh_A07G0955	0	6.80606	-5.11065	2.2e-05	0.00972352	0.000527547	down
Gh_D06G0149	5.13334	14.9282	-1.48503	8.33924e-40	0.0266484	0.017807	down									Gh_A08G1172	0	6.66148	-5.11065	2.2e-05	0.00972352	0.000527547	down
Gh_A11G2742	13.4862	32.3999	-1.25775	5.32636e-41	0.00189506	0.000782362	down									Gh_D01G1528	0	6.9709	-5.11065	2.2e-05	0.00972352	0.000527547	down
Gh_A01G1321	26.945	60.3104	-1.1278	2.27122e-42	3.7375e-05	7.3195e-06	down									Gh_D03G1097	0	6.90051	-5.11065	2.2e-05	0.00972352	0.000527547	down
Gh_A04G0833	9.76859	24.8473	-1.27037	2.58123e-39	0.00725943	0.00408757	down									Gh_D04G0617	0	6.57528	-5.11065	2.2e-05	0.00972352	0.000527547	down
Gh_A12G0470	10.2361	24.8784	-1.27037	2.58123e-39	0.00725943	0.00408757	down									Gh_D05G3708	0	6.71692	-5.11065	2.2e-05	0.00972352	0.000527547	down
Gh_D04G0190	10.3434	24.6841	-1.27037	2.58123e-39	0.00725943	0.00408757	down									Gh_D06G1424	0	6.86128	-5.11065	2.2e-05	0.00972352	0.000527547	down
Gh_A11G1562	33.35	72.1536	-1.10414	8.36898e-40	6.78159e-06	9.35956e-07	down									Gh_D08G0153	0	6.6316	-5.11065	2.2e-05	0.00972352	0.000527547	down
Gh_A05G1776	41.1662	86.7299	-1.06654	2.32162e-39	1.25218e-06	1.11287e-07	down									Gh_D08G2135	0	6.8616	-5.11065	2.2e-05	0.00972352	0.000527547	down
Gh_A10G1322	51.5508	106.772	-1.0244	1.09648e-39	1.84467e-07	8.15974e-09	down									Gh_D09G1225	0	6.58268	-5.11065	2.2e-05	0.00972352	0.000527547	down
Gh_A05G3347	7.29432	17.8197	-1.29283	6.66144e-43	0.0270152	0.0201245	down									Gh_D11G2521	0	6.93636	-5.11065	2.2e-05	0.00972352	0.000527547	down
Gh_A07G0049	7.41988	17.9323	-1.29283	6.66144e-43	0.0270152	0.0201245	down									Gh_D13G0454	0	6.74446	-5.11065	2.2e-05	0.00972352	0.000527547	down
Gh_D03G1214	7.14098	17.7844	-1.29283	6.66144e-43	0.0270152	0.0201245	down									Gh_D13G1803	0	6.72336	-5.11065	2.2e-05	0.00972352	0.000527547	down
Gh_D03G1641	7.38374	18.0604	-1.29283	6.66144e-43	0.0270152	0.0201245	down									Gh_D13G1873	0	6.99963	-5.11065	2.2e-05	0.00972352	0.000527547	down
Gh_A05G3692	26.4894	56.9024	-1.10786	5.49626e-40	8.11848e-05	1.92128e-05	down									Gh_D01G0534	2.28994	29.3997	-3.74328	1.25e-05	1.64e-05	5.36e-11	down
Gh_A02G1457	5.8473	16.4138	-1.33422	3.30894e-40	0.0353411	0.0274469	down									Gh_A13G1604	8.99026	102.715	-3.37721	1.29e-05	1.94e-19	6.74e-35	down
Gh_D01G0424	6.05499	16.4026	-1.33422	3.30894e-40	0.0353411	0.0274469	down									Gh_A04G1480	0	6.30621	-5.00374	2.87e-05	0.0123283	0.000957563	down
Gh_D08G0109	6.46815	16.1	-1.33422	3.30894e-40	0.0353411	0.0274469	down									Gh_A05G0647	0	6.13925	-5.00374	2.87e-05	0.0123283	0.000957563	down
Gh_D07G1872	17.5205	41.4859	-1.15586	7.12516e-41	0.000778398	0.000290809	down									Gh_A05G3635	0	6.08139	-5.00374	2.87e-05	0.0123283	0.000957563	down
Gh_D10G0162	19.0855	42.8645	-1.14782	4.6864e-39	0.000591498	0.00021048	down									Gh_A08G0437	0	6.09283	-5.00374	2.87e-05	0.0123283	0.000957563	down
Gh_A03G1505	9.40229	21.6969	-1.23419	3.03162e-40	0.0160058	0.01085	down									Gh_A08G1931	0	6.36041	-5.00374	2.87e-05	0.0123283	0.000957563	down
Gh_A10G0878	9.35375	22.4662	-1.23419	3.03162e-40	0.0160058	0.01085	down									Gh_A10G0442	0	6.3673	-5.00374	2.87e-05	0.0123283	0.000957563	down
Gh_D01G2052	8.57892	22.4365	-1.23419	3.03162e-40	0.0160058	0.01085	down									Gh_A11G1986	0	6.29775	-5.00374	2.87e-05	0.0123283	0.000957563	down
Gh_D05G0339	9.39697	21.6405	-1.23419	3.03162e-40	0.0160058	0.01085	down									Gh_A12G2316	0	6.44951	-5.00374	2.87e-05	0.0123283	0.000957563	down
Gh_D06G0108	8.79561	21.7485	-1.23419	3.03162e-40	0.0160058	0.01085	down									Gh_A12G2618	0	6.16552	-5.00374	2.87e-05	0.0123283	0.000957563	down
Gh_D09G0097	9.359	22.2473	-1.23419	3.03162e-40	0.0160058	0.01085	down									Gh_A13G0150	0	6.49102	-5.00374	2.87e-05	0.0123283	0.000957563	down
Gh_D11G0753	8.52115	22.3675	-1.23419	3.03162e-40	0.0160058	0.01085	down									Gh_A13G0809	0	6.02101	-5.00374	2.87e-05	0.0123283	0.000957563	down
Gh_D12G1020	9.45261	21.6636	-1.23419	3.03162e-40	0.0160058	0.01085	down									Gh_D01G0523	0	6.13447	-5.00374	2.87e-05	0.0123283	0.000957563	down
Gh_D13G1444	8.83567	21.8881	-1.23419	3.03162e-40	0.0160058	0.01085	down									Gh_D02G0567	0	6.44897	-5.00374	2.87e-05	0.0123283	0.000957563	down
Gh_A12G0772	12.9785	30.7528	-1.21266	1.49715e-39	0.00320871	0.00153106	down									Gh_D02G1052	0	6.40003	-5.00374	2.87e-05	0.0123283	0.000957563	down
Gh_A06G1855	8.31072	20.1023	-1.26035	3.48074e-41	0.0208363	0.0146917	down									Gh_D04G1400	0	6.04468	-5.00374	2.87e-05	0.0123283	0.000957563	down
Gh_A09G1391	7.91222	19.8041	-1.26035	3.48074e-41	0.0208363	0.0146917	down									Gh_D06G0326	0	6.21855	-5.00374	2.87e-05	0.0123283	0.000957563	down
Gh_A09G1748	8.17623	19.6625	-1.26035	3.48074e-41	0.0208363	0.0146917	down									Gh_D08G1777	0	6.32099	-5.00374	2.87e-05	0.0123283	0.000957563	down
Gh_A08G0694	15.7042	37.377	-1.1747	1.64833e-40	0.00138009	0.000561898	down									Gh_D09G0271	0	6.16014	-5.00374	2.87e-05	0.0123283	0.000957563	down
Gh_A11G1961	15.3393	34.9783	-1.18582	9.25167e-40	0.00183085	0.000785433	down									Gh_D10G1098	0	6.33347	-5.00374	2.87e-05	0.0123283	0.000957563	down
Gh_A11G0262	29.0612	62.0577	-1.07344	4.43955e-39	5.7758e-05	1.26753e-05	down									Gh_A12G0511	5.8328	67.456	-3.35249	1.09e-08	8.7e-13	9.99e-23	down
Gh_D11G1774	10.4775	23.5944	-1.21266	1.08806e-40	0.0121229	0.00788438	down									Gh_D12G2172	0.669264	16.2607	-3.90503	5.66e-06	0.00373345	1.91e-06	down
Gh_A01G0224	31.1176	66.1263	-1.06831	2.78878e-40	3.30186e-05	6.39268e-06	down									Gh_A12G1061	4.04806	45.6179	-3.3842	1.08e-05	9.59e-09	1.18e-15	down
Gh_A03G0127	20.283	43.521	-1.10846	6.45704e-40	0.000732102	0.000277398	down									Gh_D12G1415	3.88926	45.9056	-3.3842	1.08e-05	9.59e-09	1.18e-15	down
Gh_D12G0972	18.2484	40.3399	-1.12067	1.84243e-40	0.00130074	0.000541316	down									Gh_A08G2353	0.750341	15.8303	-3.86063	6.15e-05	0.00434886	3.35e-06	down
Gh_A12G0064	26.6444	57.2371	-1.05442	1.0901e-40	0.000163153	4.64361e-05	down									Gh_A02G0236	72.9026	686.962	-3.09551	1.79e-06	1.3e-125	1.2e-214	down
Gh_A08G0693	10.7567	25.8241	-1.19462	2.97855e-40	0.00928438	0.00565136	down									Gh_A01G0597	0	5.9801	-4.88826	3.74e-05	0.0160329	0.00174573	down
Gh_A05G1008	35.5335	72.9556	-1.00017	1.32996e-40	3.43218e-05	6.66934e-06	down									Gh_A01G1440	0	5.6644	-4.88826	3.74e-05	0.0160329	0.00174573	down
Gh_A11G0868	5.19355	13.6477	-1.38881	5.59569e-43	0.0460368	0.0367755	down									Gh_A02G1277	0	5.74507	-4.88826	3.74e-05	0.0160329	0.00174573	down
Gh_A11G1022	4.56424	13.6697	-1.38881	5.59569e-43	0.0460368	0.0367755	down									Gh_A04G0262	0	5.68418	-4.88826	3.74e-05	0.0160329	0.00174573	down
Gh_A12G1684	5.12326	13.6179	-1.38881	5.59569e-43	0.0460368	0.0367755	down									Gh_A06G0371	0	5.58925	-4.88826	3.74e-05	0.0160329	0.00174573	down
Gh_A13G2279	5.17399	14.2942	-1.38881	5.59569e-43	0.0460368	0.0367755	down									Gh_A10G0688	0	5.9988	-4.88826	3.74e-05	0.0160329	0.00174573	down
Gh_D01G1811	4.58779	14.3396	-1.38881	5.59569e-43	0.0460368	0.0367755	down									Gh_A11G0175	0	5.8533	-4.88826	3.74e-05	0.0160329	0.00174573	down
Gh_D04G1524	5.33471	13.9513	-1.38881	5.59569e-43	0.0460368	0.0367755	down									Gh_A11G1690	0	5.91929	-4.88826	3.74e-05	0.0160329	0.00174573	down
Gh_A03G0731	13.3795	30.4485	-1.16612	4.70483e-40	0.00536948	0.00292329	down									Gh_D01G0635	0	5.71487	-4.88826	3.74e-05	0.0160329	0.00174573	down
Gh_D08G1467	15.4303	33.6096	-1.1446	4.06466e-40	0.00306644	0.00150031	down									Gh_D01G1423	0	5.71619	-4.88826	3.74e-05	0.0160329	0.00174573	down
Gh_A08G2515	11.9843	27.9845	-1.1793	1.51701e-39	0.00703122	0.00410084	down									Gh_D04G0832	0	5.6488	-4.88826	3.74e-05	0.0160329	0.00174573	down
Gh_D10G0229	11.6285	27.537	-1.1793	1.51701e-39	0.00703122	0.00410084	down									Gh_D06G0936	0	5.73629	-4.88826	3.74e-05	0.0160329	0.00174573	down
Gh_D05G2931	14.325	32.2464	-1.15466	1.60328e-40	0.00406788	0.00209389	down									Gh_D06G1566	0	5.53364	-4.88826	3.74e-05	0.0160329	0.00174573	down
Gh_D03G1116	17.6929	39.28	-1.0846	8.26326e-41	0.00214652	0.00100042	down									Gh_D10G2486	0	5.55765	-4.88826	3.74e-05	0.0160329	0.00174573	down
Gh_A07G0734	16.1724	35.7341	-1.1357	5.85078e-40	0.00230725	0.00106591	down									Gh_D10G2576	0	5.52074	-4.88826	3.74e-05	0.0160329	0.00174573	down
Gh_D01G1300	15.9235	36.0098	-1.1357	5.85078e-40	0.00230725	0.00106591	down									Gh_D13G0962	0	5.68304	-4.88826	3.74e-05	0.0160329	0.00174573	down
Gh_A06G0827	27.3116	56.2862	-1.02911	8.88004e-40	0.000264272	8.49435e-05	down									Gh_D13G1050	0	5.67543	-4.88826	3.74e-05	0.0160329	0.00174573	down
Gh_D13G0709	24.3286	49.8079	-1.03378	1.06222e-40	0.000629234	0.000236914	down									Gh_D13G1574	0	5.73353	-4.88826	3.74e-05	0.0160329	0.00174573	down
Gh_A04G0619	33.2999	67.1833	-1.00104	3.149e-40	7.86207e-05	1.87173e-05	down									Gh_D02G0169	2.51929	28.5742	-3.39669	0.00109087	1.42e-05	5.88e-10	down
Gh_D07G0212	8.27752	19.2083	-1.1882	3.82238e-41	0.0344362	0.0282702	down									Gh_A02G0362	0	5.05776	-4.76273	7.74e-06	0.0209855	0.00315712	down
Gh_A02G1125	10.2144	23.2257	-1.15254	3.82303e-40	0.020062	0.0146242	down									Gh_A03G0916	0	5.23093	-4.76273	7.74e-06	0.0209855	0.00315712	down
Gh_A05G0855	10.4692	23.2588	-1.15254	3.82303e-40	0.020062	0.0146242	down									Gh_A04G0085	0	5.35001	-4.76273	7.74e-06	0.0209855	0.00315712	down
Gh_A10G2115	9.73291	22.7551	-1.15254	3.82303e-40	0.020062	0.0146242	down									Gh_A06G0310	0.143005	5.17546	-4.76273	7.74e-06	0.0209855	0.00315712	down
Gh_D13G1129	9.57348	23.469	-1.15254	3.82303e-40	0.020062	0.0146242	down									Gh_A08G0461	0	5.25833	-4.76273	7.74e-06	0.0209855	0.00315712	down
Gh_D08G0946	25.0058	50.7387	-1.00436	1.6024e-39	0.000754557	0.000295864	down									Gh_A10G0340	0	5.34561	-4.76273	7.74e-06	0.0209855	0.00315712	down
Gh_A02G1635	7.42439	17.242	-1.21266	7.7841e-43	0.0455866	0.0388755	down									Gh_A12G1512	0	5.48984	-4.76273	7.74e-06	0.0209855	0.00315712	down
Gh_A03G0681	7.04534	17.1272	-1.21266	7.7841e-43	0.0455866	0.0388755	down									Gh_A13G1134	0	5.18112	-4.76273	7.74e-06	0.0209855	0.00315712	down
Gh_A05G0194	6.54498	17.4845	-1.21266	7.7841e-43	0.0455866	0.0388755	down									Gh_A13G1671	0	5.49054	-4.76273	7.74e-06	0.0209855	0.00315712	down
Gh_A07G0581	6.7427	17.0922	-1.21266	7.7841e-43	0.0455866	0.0388755	down									Gh_D01G0001	0	5.04408	-4.76273	7.74e-06	0.0209855	0.00315712	down
Gh_A11G0092	6.96533	17.4745	-1.21266	7.7841e-43	0.0455866	0.0388755	down									Gh_D02G0010	0	5.08198	-4.76273	7.74e-06	0.0209855	0.00315712	down
Gh_D06G0959	6.87742	16.7519	-1.21266	7.7841e-43	0.0455866	0.0388755	down									Gh_D02G2035	0	5.28744	-4.76273	7.74e-06	0.0209855	0.00315712	down
Gh_D10G0907	6.68544	17.0229	-1.21266	7.7841e-43	0.0455866	0.0388755	down									Gh_D03G0630	0	5.39108	-4.76273	7.74e-06	0.0209855	0.00315712	down
Gh_A12G2406	27.307	55.2228	-1.00334	3.19149e-39	0.000427361	0.000151999	down									Gh_D03G1716	0	5.10197	-4.76273	7.74e-06	0.0209855	0.00315712	down
Gh_A07G0616	8.59832	21.2174	-1.1686	4.53756e-41	0.0261446	0.0203027	down									Gh_D06G0441	0	5.31533	-4.76273	7.74e-06	0.0209855	0.00315712	down
Gh_A08G1031	8.80132	20.7766	-1.1686	4.53756e-41	0.0261446	0.0203027	down									Gh_D08G0276	0	5.17681	-4.76273	7.74e-06	0.0209855	0.00315712	down
Gh_D11G2052	9.072	20.9425	-1.1686	4.53756e-41	0.0261446	0.0203027	down									Gh_D09G0221	0	5.16351	-4.76273	7.74e-06	0.0209855	0.00315712	down
Gh_D11G2971	9.2431	20.8599	-1.1686	4.53756e-41	0.0261446	0.0203027	down									Gh_D09G0476	0	5.35168	-4.76273	7.74e-06	0.0209855	0.00315712	down
Gh_D13G2052	9.43362	21.1824	-1.1686	4.53756e-41	0.0261446	0.0203027	down									Gh_D09G2360	0	5.15446	-4.76273	7.74e-06	0.0209855	0.00315712	down
Gh_A03G2022	10.8146	24.517	-1.13913	4.32398e-40	0.0153514	0.0107075	down									Gh_D10G1885	0	5.22168	-4.76273	7.74e-06	0.0209855	0.00315712	down
Gh_A05G3394	10.8314	24.5722	-1.13913	4.32398e-40	0.0153514	0.0107075	down									Gh_D11G3471	0	5.12337	-4.76273	7.74e-06	0.0209855	0.00315712	down
Gh_A06G0188	11.4163	24.5449	-1.13913	4.32398e-40	0.0153514	0.0107075	down									Gh_D13G2035	0	5.38732	-4.76273	7.74e-06	0.0209855	0.00315712	down
Gh_D03G0942	10.7639	25.2075	-1.13913	4.32398e-40	0.0153514	0.0107075	down									Gh_D12G2457	0.823779	14.1963	-3.71862	0.000104273	0.00701597	1.76e-05	down
Gh_A03G1801	23.4628	48.0183	-1.0356	2.86691e-39	0.000831583	0.000326889	down									Gh_D11G2647	18.464	165.065	-3.0614	1.28e-09	2.46e-31	4.78e-51	down
Gh_A10G1515	12.8353	28.7938	-1.11802	4.95277e-39	0.0087464	0.00546649	down									Gh_D08G0973	2.11736	22.9382	-3.3842	8.32e-05	0.000178639	6.56e-08	down
Gh_D05G1581	14.8206	32.9714	-1.10216	4.66444e-39	0.00503269	0.00278714	down									Gh_D11G2210	2.87948	31.1995	-3.25296	7.84e-05	4.57e-06	2.22e-10	down
Gh_D02G1756	15.8733	34.8531	-1.09562	1.95405e-40	0.00379732	0.00198719	down									Gh_D05G1190	11.6733	108.588	-3.04386	2.27e-05	1.27e-20	2.1e-33	down
Gh_D09G1109	16.0934	35.0077	-1.09562	1.95405e-40	0.00379732	0.00198719	down									Gh_D05G0107	1.3102	13.6971	-3.66799	7.92e-06	0.00829376	3.05e-05	down
Gh_D08G1218	13.8978	31.1946	-1.10957	4.46505e-39	0.00663342	0.00393665	down									Gh_D12G0644	1.16472	13.2707	-3.61552	0.000117505	0.00979675	5.21e-05	down
Gh_A11G0695	12.0041	26.9756	-1.12777	5.31502e-39	0.0115256	0.00766393	down									Gh_A01G0509	0	4.61623	-4.62523	0.000181266	0.0282769	0.0056961	down
Gh_D01G0689	12.0115	27.4436	-1.12777	5.31502e-39	0.0115256	0.00766393	down									Gh_A01G0688	0	4.64329	-4.62523	0.000181266	0.0282769	0.0056961	down
Gh_D09G1582	11.8172	27.3947	-1.12777	5.31502e-39	0.0115256	0.00766393	down									Gh_A02G1716	0.499301	4.59887	-4.62523	0.000181266	0.0282769	0.0056961	down
Gh_D11G0282	19.1523	39.7274	-1.04472	1.31951e-39	0.00263873	0.00130175	down									Gh_A03G0866	0	4.92363	-4.62523	0.000181266	0.0282769	0.0056961	down
Gh_D07G0163	22.4942	44.5747	-1.00622	4.51122e-39	0.00179294	0.000820944	down									Gh_A03G1157	0	4.66726	-4.62523	0.000181266	0.0282769	0.0056961	down
Gh_D13G2124	20.1206	41.319	-1.00776	2.44876e-42	0.00318083	0.00164716	down									Gh_A04G0660	0.146199	4.65888	-4.62523	0.000181266	0.0282769	0.0056961	down
Gh_A07G0378	9.54909	22.0167	-1.0898	1.29663e-42	0.0322219	0.0270041	down									Gh_A06G0612	0	4.55249	-4.62523	0.000181266	0.0282769	0.0056961	down
Gh_D12G2100	9.62912	21.9304	-1.0898	1.29663e-42	0.0322219	0.0270041	down									Gh_A07G2118	0	4.72785	-4.62523	0.000181266	0.0282769	0.0056961	down
Gh_D13G1508	9.87924	21.6363	-1.0898	1.29663e-42	0.0322219	0.0270041	down									Gh_A10G1173	0	4.52171	-4.62523	0.000181266	0.0282769	0.0056961	down
Gh_A07G1984	19.0717	39.0879	-1.00865	2.6438e-39	0.0042363	0.00232003	down									Gh_A11G1684	0	4.68066	-4.62523	0.000181266	0.0282769	0.0056961	down
Gh_D02G1153	15.7428	34.2139	-1.0544	8.88131e-41	0.00612673	0.00364327	down									Gh_A13G0105	0.32178	4.53668	-4.62523	0.000181266	0.0282769	0.0056961	down
Gh_A03G0524	10.9265	24.4292	-1.08141	1.16231e-39	0.0246818	0.0192572	down									Gh_A13G1080	0	4.90379	-4.62523	0.000181266	0.0282769	0.0056961	down
Gh_A13G1133	10.9046	23.5077	-1.08141	1.16231e-39	0.0246818	0.0192572	down									Gh_D01G1743	0	4.56143	-4.62523	0.000181266	0.0282769	0.0056961	down
Gh_D11G2440	11.3817	24.2583	-1.08141	1.16231e-39	0.0246818	0.0192572	down									Gh_D05G3358	0	4.54726	-4.62523	0.000181266	0.0282769	0.0056961	down
Gh_A01G0577	13.5397	29.8937	-1.06302	7.94196e-41	0.0107594	0.00716554	down									Gh_D07G0092	0	4.87945	-4.62523	0.000181266	0.0282769	0.0056961	down
Gh_A09G1118	17.3003	35.7423	-1.05081	1.32998e-39	0.00464621	0.00257662	down									Gh_D07G1939	0	4.77711	-4.62523	0.000181266	0.0282769	0.0056961	down
Gh_D05G0023	17.2295	35.5248	-1.05081	1.32998e-39	0.00464621	0.00257662	down									Gh_D08G0725	0.260422	4.53613	-4.62523	0.000181266	0.0282769	0.0056961	down
Gh_A13G0607	12.2837	25.5488	-1.07433	1.81597e-39	0.0186794	0.0137494	down									Gh_D09G0733	0	4.8192	-4.62523	0.000181266	0.0282769	0.0056961	down
Gh_D01G0390	8.94347	19.7802	-1.09989	5.02331e-41	0.043129	0.0374404	down									Gh_D10G0756	0	4.71061	-4.62523	0.000181266	0.0282769	0.0056961	down
Gh_D07G0875	8.96377	20.1736	-1.09989	5.02331e-41	0.043129	0.0374404	down									Gh_D11G2291	0	4.71389	-4.62523	0.000181266	0.0282769	0.0056961	down
Gh_A11G0398	12.8801	28.2076	-1.06827	1.42091e-39	0.0142857	0.0100421	down									Gh_D12G0525	0	4.5458	-4.62523	0.000181266	0.0282769	0.0056961	down
Gh_D13G2123	16.3282	32.9423	-1.01196	1.34706e-39	0.00982711	0.00647751	down									Gh_A06G1086	1.42831	12.8314	-3.56107	8.98e-06	0.0116388	8.9e-05	down
Gh_D10G1930	14.1748	28.8842	-1.01493	2.06366e-40	0.0171464	0.0126665	down									Gh_A11G1370	1.27066	12.5295	-3.56107	8.98e-06	0.0116388	8.9e-05	down
Gh_D02G1348	15.0782	31.1502	-1.01335	9.36481e-41	0.0130046	0.00910814	down									Gh_D11G0639	3.25438	27.8266	-3.08303	1.79e-05	2.05e-05	8.8e-09	down
Gh_D05G0186	14.9764	30.8682	-1.01335	9.36481e-41	0.0130046	0.00910814	down									Gh_D09G1081	11.09	87.5261	-2.86064	6.12e-05	1.74e-16	2.78e-25	down
Gh_D11G0754	11.1351	23.3914	-1.02129	6.90341e-41	0.0394748	0.0342417	down									Gh_D05G0583	0.797591	11.7133	-3.4456	4.92e-05	0.0165359	0.000256657	down
Gh_D11G1929	11.2738	22.8151	-1.02129	6.90341e-41	0.0394748	0.0342417	down									Gh_A01G0447	0.291407	4.06804	-4.47322	1.5e-05	0.0387105	0.0102672	down
Gh_D13G2121	11.3601	23.0932	-1.02129	6.90341e-41	0.0394748	0.0342417	down									Gh_A03G0005	0	4.23421	-4.47322	1.5e-05	0.0387105	0.0102672	down
Gh_D01G1683	12.5342	26.6535	-1.01674	4.81396e-40	0.0226424	0.0176227	down									Gh_A05G0859	0	4.05921	-4.47322	1.5e-05	0.0387105	0.0102672	down
Gh_D13G2090	13.4807	27.3645	-1.01674	4.81396e-40	0.0226424	0.0176227	down									Gh_A06G0078	0	4.13762	-4.47322	1.5e-05	0.0387105	0.0102672	down
																Gh_A06G0143	0.121183	4.46811	-4.47322	1.5e-05	0.0387105	0.0102672	down
																Gh_A06G0695	0	4.37299	-4.47322	1.5e-05	0.0387105	0.0102672	down
																Gh_A06G2089	0	4.2109	-4.47322	1.5e-05	0.0387105	0.0102672	down
																Gh_A08G1817	0.493203	4.35029	-4.47322	1.5e-05	0.0387105	0.0102672	down
																Gh_A09G0857	0	4.13315	-4.47322	1.5e-05	0.0387105	0.0102672	down
																Gh_A12G0019	0.349227	4.38173	-4.47322	1.5e-05	0.0387105	0.0102672	down
																Gh_D02G1623	0	4.43559	-4.47322	1.5e-05	0.0387105	0.0102672	down
																Gh_D03G0273	0	4.17041	-4.47322	1.5e-05	0.0387105	0.0102672	down
																Gh_D03G0839	0	4.41231	-4.47322	1.5e-05	0.0387105	0.0102672	down
																Gh_D05G1621	0	4.49009	-4.47322	1.5e-05	0.0387105	0.0102672	down
																Gh_D06G0778	0.333893	4.31413	-4.47322	1.5e-05	0.0387105	0.0102672	down
																Gh_D08G1711	0.384293	4.01106	-4.47322	1.5e-05	0.0387105	0.0102672	down
																Gh_D09G0935	0	4.41441	-4.47322	1.5e-05	0.0387105	0.0102672	down
																Gh_D10G0539	0	4.25089	-4.47322	1.5e-05	0.0387105	0.0102672	down
																Gh_D10G1248	0	4.33427	-4.47322	1.5e-05	0.0387105	0.0102672	down
																Gh_D10G1789	0	4.20835	-4.47322	1.5e-05	0.0387105	0.0102672	down
																Gh_D11G2193	0	4.28431	-4.47322	1.5e-05	0.0387105	0.0102672	down
																Gh_D12G1639	0	4.22914	-4.47322	1.5e-05	0.0387105	0.0102672	down
																Gh_D12G2798	0	4.08519	-4.47322	1.5e-05	0.0387105	0.0102672	down
																Gh_D04G1957	12.4042	93.6942	-2.83027	3.45e-05	1.49e-17	1.07e-26	down
																Gh_A13G0851	3.9893	32.9623	-2.90503	0.000230101	2.71e-06	1.03e-09	down
																Gh_D10G1156	3.84276	32.8471	-2.90503	0.000230101	2.71e-06	1.03e-09	down
																Gh_A12G2112	1.49021	11.0785	-3.3842	0.000158128	0.0198785	0.000431997	down
																Gh_A02G1244	7.09207	53.0731	-2.79475	0.000237029	5.26e-10	5.06e-15	down
																Gh_D05G3859	11.2199	80.0821	-2.73212	8.03e-07	6.76e-15	5.33e-22	down
																Gh_D02G0715	2.5247	20.695	-2.93103	0.00159084	0.000421999	2.6e-06	down
																Gh_A05G4009	1.79913	17.5742	-3.03056	0.000342744	0.0014228	1.26e-05	down
																Gh_D04G1754	2.40527	17.6033	-3.03056	0.000342744	0.0014228	1.26e-05	down
																Gh_D10G2310	1.9483	17.8264	-3.03056	0.000342744	0.0014228	1.26e-05	down
																Gh_D03G0758	1.49262	10.9344	-3.32007	2.29e-08	0.0238873	0.000719517	down
																Gh_D12G2401	19.2604	131.901	-2.65711	7.38e-05	3.78e-24	6.09e-35	down
																Gh_D11G0739	9.04887	64.771	-2.71308	6.41e-06	5.18e-12	1.22e-17	down
																Gh_D05G2161	1.82568	17.0136	-2.98992	2.25e-05	0.00176526	2.1e-05	down
																Gh_A10G1247	11.4226	76.6515	-2.66799	2.54e-05	3.92e-14	1.72e-20	down
																Gh_A12G2300	1.12587	10.4242	-3.25295	0.00036512	0.0290103	0.00120432	down
																Gh_D02G0891	182.89	1059.35	-2.39547	1.83e-08	7.74e-148	1.01e-248	down
																Gh_A09G1674	2.07599	16.848	-2.9481	0.000373681	0.00220136	3.48e-05	down
																Gh_A10G2003	1.5707	16.6448	-2.9481	0.000373681	0.00220136	3.48e-05	down
																Gh_A04G1301	6.53066	44.5981	-2.65205	0.000208971	2.7e-08	6.13e-12	down
																Gh_D12G1185	24.4793	157.076	-2.57489	2.09e-05	2e-28	3.16e-40	down
																Gh_D07G1197	92.6175	571.295	-2.48042	2.28e-11	2.59e-98	6.24e-140	down
																Gh_A02G1268	107.914	658.563	-2.47041	1.07e-08	1.74e-110	1.43e-160	down
																Gh_A05G0415	24.5826	158.5	-2.52967	4.3e-07	1.86e-28	8.81e-40	down
																Gh_A01G2073	11.5142	74.1632	-2.55625	6.73e-05	1.97e-13	6.97e-19	down
																Gh_D12G0665	1.45446	9.99149	-3.18256	1.51e-05	0.0356039	0.00199594	down
																Gh_D13G1080	19.9309	124.646	-2.5045	2.31e-05	2.8e-22	6.62e-31	down
																Gh_D10G2439	2.321	15.7049	-2.86064	0.000265246	0.00345179	9.35e-05	down
																Gh_D12G2681	9.12764	58.8711	-2.57336	9.19e-09	1.08e-10	4.27e-15	down
																Gh_D10G1431	34.2365	207.064	-2.47015	4e-05	1.05e-36	1.71e-50	down
																Gh_A12G0549	136.583	780.491	-2.37167	4.54e-06	6.7e-122	5.33e-181	down
																Gh_D01G2294	9.448	57.9256	-2.54869	6.02e-06	1.8e-10	1.12e-14	down
																Gh_A12G2323	4.9199	32.8528	-2.5831	0.000224588	4.6e-06	1.51e-08	down
																Gh_D04G1078	11.1476	68.1843	-2.49924	0.000131206	3.21e-12	6.37e-17	down
																Gh_A12G0132	5.69877	38.1848	-2.54246	7.17e-05	5.39e-07	9.15e-10	down
																Gh_A03G1718	1.36408	9.33364	-3.10856	0.000239339	0.0436066	0.00329645	down
																Gh_A11G1551	0.655368	9.158	-3.10856	0.000239339	0.0436066	0.00329645	down
																Gh_D12G1290	1.28272	9.43666	-3.10856	0.000239339	0.0436066	0.00329645	down
																Gh_A12G2287	2.18653	14.9983	-2.76753	3.08e-05	0.00542292	0.00024828	down
																Gh_A11G0124	4.62205	31.9428	-2.53871	9.43e-05	7.68e-06	3.91e-08	down
																Gh_D10G1429	45.7745	267.867	-2.40319	2.1e-10	1.1e-46	4.19e-63	down
																Gh_A01G1126	24.7187	144.933	-2.39669	2.08e-06	3.17e-25	5.4e-34	down
																Gh_A11G3305	9.34416	55.0394	-2.48513	0.000182011	6.73e-10	1.21e-13	down
																Gh_D02G1898	2.82931	19.5575	-2.5976	0.000163391	0.000875272	2.67e-05	down
																Gh_A11G2927	1.80948	14.3662	-2.71862	0.000452931	0.00685479	0.00039915	down
																Gh_A03G1502	1.527	11.3308	-2.79924	0.00589211	0.0209855	0.00190202	down
																Gh_A05G2240	1.53022	11.0464	-2.79924	0.00589211	0.0209855	0.00190202	down
																Gh_D09G1314	6.48093	36.1883	-2.4655	1.22e-05	1.54e-06	6.08e-09	down
																Gh_D01G0627	4.38685	25.3535	-2.53306	0.000127756	0.00010741	1.65e-06	down
																Gh_A11G2333	67.7013	387.381	-2.37131	7.55e-11	1.34e-66	8.46e-90	down
																Gh_A12G0891	2.75602	19.2489	-2.56108	2.75e-05	0.00112447	4.27e-05	down
																Gh_A11G1803	5.4221	30.3579	-2.46945	3.24e-08	1.67e-05	1.6e-07	down
																Gh_A08G0299	3.92963	24.8825	-2.50449	0.000108828	0.000138761	2.65e-06	down
																Gh_D12G0566	101.19	542.331	-2.28619	0.000105634	5.62e-89	3.61e-120	down
																Gh_D03G0408	68.6024	387.187	-2.35025	7.38e-11	3.14e-66	8.11e-89	down
																Gh_D11G2612	7.9153	47.5318	-2.4456	8e-05	1.64e-08	1.37e-11	down
																Gh_A02G0841	262.023	1264.88	-2.13389	4.08e-12	2.23e-137	2.22e-256	down
																Gh_A09G1073	21.9318	122.484	-2.33785	1.51e-09	5.4e-21	7.33e-28	down
																Gh_D10G2193	14.4521	78.1369	-2.34791	0.000100677	1.63e-13	5.81e-18	down
																Gh_D08G1701	18.2872	100.089	-2.34177	7.36e-05	3.07e-17	6.61e-23	down
																Gh_D11G1171	3.27869	18.7735	-2.5236	0.000432294	0.00144155	6.84e-05	down
																Gh_D13G1963	6.71096	40.8535	-2.41084	0.000309712	3.07e-07	9.26e-10	down
																Gh_A03G0437	4.30759	24.0179	-2.47535	0.000332547	0.000178845	4.22e-06	down
																Gh_D13G0211	21.9611	118.506	-2.29603	1.23e-05	3.74e-20	1.83e-26	down
																Gh_A01G0224	11.7132	66.1263	-2.33096	2.25e-05	2.09e-11	4.19e-15	down
																Gh_A05G1464	4.78364	28.6949	-2.39669	0.000109418	3.68e-05	6.45e-07	down
																Gh_D02G0304	155.818	772.379	-2.16944	3.15e-09	5.35e-112	5.1e-160	down
																Gh_D07G2487	9.15724	49.6007	-2.33457	4.36e-05	1.26e-08	2.09e-11	down
																Gh_D12G0974	14.7118	80.1869	-2.28467	6.22e-07	1.3e-13	8.33e-18	down
																Gh_D11G1518	1.86977	12.9289	-2.56108	3.95e-05	0.0138399	0.00162966	down
																Gh_D05G2500	5.14739	27.1227	-2.32007	0.000114796	8.17e-05	2.57e-06	down
																Gh_D09G1582	4.73116	27.3947	-2.32007	0.000114796	8.17e-05	2.57e-06	down
																Gh_A11G0556	3.55476	22.1066	-2.35249	2.45e-05	0.000505087	2.69e-05	down
																Gh_A05G2500	2.1866	12.036	-2.50449	0.000242851	0.0175119	0.00257127	down
																Gh_D12G1687	2.16842	12.0694	-2.50449	0.000242851	0.0175119	0.00257127	down
																Gh_D11G1131	10.2237	51.5864	-2.23915	5.96e-06	1e-08	2.93e-11	down
																Gh_D07G1945	14.7452	75.2928	-2.19215	2.04e-05	2.05e-12	7.36e-16	down
																Gh_D01G2080	23.4423	112.74	-2.15726	1.22e-05	2.58e-18	3.35e-23	down
																Gh_A06G0066	18.6662	93.4521	-2.15961	3.78e-05	3.53e-15	3.09e-19	down
																Gh_A12G1863	3.13676	16.7468	-2.36314	0.000540482	0.00397407	0.000419207	down
																Gh_D05G0533	30.9472	148.824	-2.12561	3.61e-05	7.19e-24	5.23e-30	down
																Gh_D02G2274	1.92871	11.9483	-2.4456	0.000217929	0.0223199	0.0040364	down
																Gh_D13G1363	2.09421	11.7237	-2.4456	0.000217929	0.0223199	0.0040364	down
																Gh_D01G0761	10.4548	49.956	-2.18257	4.13e-05	3.02e-08	1.71e-10	down
																Gh_D08G1051	4.46543	20.7713	-2.25296	0.000168465	0.00112447	0.000101481	down
																Gh_A01G0521	8.85855	44.2784	-2.16645	4.06e-05	2.58e-07	2.84e-09	down
																Gh_A07G1742	3.41671	16.3774	-2.32007	3.56e-05	0.00506591	0.000650167	down
																Gh_D02G0206	3.10036	16.0877	-2.32007	3.56e-05	0.00506591	0.000650167	down
																Gh_A12G1166	21.0937	97.8392	-2.08303	2.3e-09	1.85e-15	3.15e-19	down
																Gh_A07G0141	14.8861	70.0532	-2.0933	7.59e-05	3.41e-11	5.87e-14	down
																Gh_D11G1967	11.8937	56.6489	-2.10857	0.000149592	3.94e-09	2.05e-11	down
																Gh_D04G2026	6.38626	29.4753	-2.15832	1.64e-05	6.65e-05	3.48e-06	down
																Gh_A13G0197	14.8514	69.6242	-2.08303	3.67e-06	4.49e-11	9e-14	down
																Gh_D01G1766	1.82672	11.3967	-2.3842	0.000703836	0.0287233	0.00621993	down
																Gh_D05G0041	2.20508	11.1431	-2.3842	0.000703836	0.0287233	0.00621993	down
																Gh_D05G1085	1.82106	11.4749	-2.3842	0.000703836	0.0287233	0.00621993	down
																Gh_D12G2415	8.42354	38.02	-2.12743	6.3e-05	2.87e-06	7.29e-08	down
																Gh_D01G0967	4.11355	19.8279	-2.18257	0.000184557	0.00189957	0.000241556	down
																Gh_A09G2386	5.14083	24.4746	-2.15342	0.000342965	0.000410516	3.64e-05	down
																Gh_A02G1344	30.0235	134.019	-2.02521	1.9e-06	1.03e-20	2.13e-25	down
																Gh_A13G1464	243.714	942.548	-1.81225	1.29e-08	3.74e-102	9.27e-153	down
																Gh_D06G1799	847.511	3287.79	-1.81915	7.26e-11	3.2e-120	0	down
																Gh_A04G0620	3.83708	19.3072	-2.14604	3.13e-05	0.00248169	0.000367315	down
																Gh_D09G2285	42.8961	188.912	-1.99662	3.62e-05	9.89e-29	5.36e-35	down
																Gh_D02G0804	3.4281	15.2457	-2.22987	0.000109671	0.00851016	0.00155055	down
																Gh_D02G1979	9.31118	41.9144	-2.08303	0.000132883	1.03e-06	2.5e-08	down
																Gh_A12G1558	137.187	565.522	-1.90765	9.88e-12	1.83e-78	1.36e-98	down
																Gh_A13G1490	5.94366	27.8879	-2.08303	1.87e-05	0.000151171	1.26e-05	down
																Gh_A02G0788	1.67626	10.8866	-2.32007	1.03e-07	0.0372121	0.00968807	down
																Gh_A05G1930	2.43274	10.6692	-2.32007	1.03e-07	0.0372121	0.00968807	down
																Gh_A07G0109	2.29574	10.5359	-2.32007	1.03e-07	0.0372121	0.00968807	down
																Gh_A08G1759	2.05281	10.6368	-2.32007	1.03e-07	0.0372121	0.00968807	down
																Gh_A12G2130	1.97897	10.8472	-2.32007	1.03e-07	0.0372121	0.00968807	down
																Gh_D04G1504	2.25376	10.7331	-2.32007	1.03e-07	0.0372121	0.00968807	down
																Gh_D11G0320	2.35338	10.6172	-2.32007	1.03e-07	0.0372121	0.00968807	down
																Gh_D12G1519	2.06899	10.9833	-2.32007	1.03e-07	0.0372121	0.00968807	down
																Gh_D12G1291	2.51308	12.5662	-2.23915	0.00304123	0.0201039	0.00482903	down
																Gh_D02G0869	51.2648	221.273	-1.97939	5.54e-07	2.12e-33	1.51e-40	down
																Gh_D03G0479	50.0892	217.544	-1.98498	1.16e-05	5.84e-33	4.59e-40	down
																Gh_A01G1265	3.28631	14.5239	-2.18257	4.61e-05	0.0109968	0.00237055	down
																Gh_D02G1523	2.88283	14.9764	-2.18257	4.61e-05	0.0109968	0.00237055	down
																Gh_A05G1862	3.87413	18.6701	-2.10857	0.00049442	0.00323415	0.000555982	down
																Gh_D02G2203	4.21624	18.6419	-2.10857	0.00049442	0.00323415	0.000555982	down
																Gh_D06G0402	7.1761	31.7144	-2.05328	0.000107225	4.2e-05	2.81e-06	down
																Gh_D04G0105	147.608	598.556	-1.87806	1.82e-09	1.18e-80	4.37e-102	down
																Gh_A11G1444	14.4094	60.1915	-1.97215	2.27e-05	3.69e-09	4.39e-11	down
																Gh_A06G1466	1065.98	3640.76	-1.63538	1.08e-10	5.77e-103	0	down
																Gh_A11G1830	28.0558	116.553	-1.92365	1.7e-05	3.24e-17	1.35e-20	down
																Gh_A12G1415	5.04398	22.1898	-2.03056	2.58e-05	0.00122003	0.000195337	down
																Gh_D01G1872	5.35656	22.1604	-2.03056	2.58e-05	0.00122003	0.000195337	down
																Gh_D05G2157	47.5099	197.338	-1.9165	1.48e-05	6.24e-29	1.41e-34	down
																Gh_A11G2570	4.2256	18.0236	-2.07009	0.000176833	0.0042105	0.000847231	down
																Gh_D02G0136	4.21448	18.1639	-2.07009	0.000176833	0.0042105	0.000847231	down
																Gh_A03G0057	21.8354	93.1854	-1.9481	3.43e-05	6.11e-14	8.88e-17	down
																Gh_A07G1131	6.86774	30.7306	-2.00748	0.000254563	7.31e-05	6.5e-06	down
																Gh_D10G1120	14.1643	58.3642	-1.92365	0.000134073	1.13e-08	2.27e-10	down
																Gh_A01G1923	24.4897	99.8506	-1.91953	2.06e-06	1.04e-14	1.43e-17	down
																Gh_D11G0511	4.66496	21.917	-1.99814	0.000163845	0.00159569	0.000293046	down
																Gh_A12G1940	25.336	103.307	-1.91027	1.85e-09	3.82e-15	4.7e-18	down
																Gh_A01G1741	6.96441	30.0519	-1.98402	1.3e-05	9.69e-05	9.85e-06	down
																Gh_D11G1049	7.20623	30.3246	-1.98402	1.3e-05	9.69e-05	9.85e-06	down
																Gh_A05G3239	5.85059	25.5662	-1.97612	0.000105437	0.000451723	6.7e-05	down
																Gh_D12G1383	186.404	706.839	-1.78778	1.34e-09	1.23e-85	2.42e-112	down
																Gh_D05G2745	8.57471	38.0344	-1.9575	6.08e-05	7.4e-06	4.7e-07	down
																Gh_D06G0041	146.741	563.378	-1.79962	8.34e-08	2.01e-73	2.17e-90	down
																Gh_A13G0271	3.47586	13.5548	-2.08303	5.31e-05	0.0182271	0.00545491	down
																Gh_A05G0320	10.5626	45.6062	-1.92477	6.79e-06	7.38e-07	3.37e-08	down
																Gh_A09G0073	8.64307	37.5512	-1.93864	2.58e-05	9.84e-06	7.04e-07	down
																Gh_D12G1686	191.027	716.081	-1.76878	1.29e-09	2.63e-85	4.07e-112	down
																Gh_D05G1836	29.5214	116.658	-1.84836	3.46e-05	1.4e-16	1.75e-19	down
																Gh_D08G2334	14.0187	56.3021	-1.87346	7.85e-09	3.49e-08	1.15e-09	down
																Gh_D13G1066	94.7354	379.548	-1.86073	4.55e-11	1.26e-53	6.73e-64	down
																Gh_D13G1051	106.925	415.489	-1.818	0.0245862	5.43e-57	1.34e-67	down
																Gh_A13G0352	8.2453	33.479	-1.92673	6.53e-05	4.72e-05	4.89e-06	down
																Gh_D07G0169	5.88879	24.9985	-1.91953	0.000113222	0.000788244	0.000149707	down
																Gh_D08G1379	6.30536	24.7382	-1.91953	0.000113222	0.000788244	0.000149707	down
																Gh_A13G1733	4.59286	20.6079	-1.93103	0.00017997	0.00273068	0.000650918	down
																Gh_A12G0561	8.99997	36.7978	-1.90017	0.000159237	1.72e-05	1.61e-06	down
																Gh_D12G1024	19.4751	74.8084	-1.84153	1.54e-05	1.24e-10	1.81e-12	down
																Gh_A09G1151	52.7033	203.447	-1.80161	9.23e-06	4.51e-28	1.16e-32	down
																Gh_A05G2432	2.59446	13.4616	-2.03056	0.000798324	0.023702	0.00817639	down
																Gh_D05G0146	2.95597	13.1289	-2.03056	0.000798324	0.023702	0.00817639	down
																Gh_A12G2265	7.06424	28.558	-1.91126	0.000129576	0.000220517	3.35e-05	down
																Gh_A09G0635	12.793	51.9335	-1.86064	5.37e-06	1.71e-07	8e-09	down
																Gh_D03G0418	20.3016	77.3528	-1.81484	1.46e-05	7.95e-11	1.28e-12	down
																Gh_D05G1926	27.9546	108.084	-1.81484	1.68e-05	4.13e-15	1.28e-17	down
																Gh_D12G1013	27.1225	104.204	-1.81311	4.83e-06	1.51e-14	5.94e-17	down
																Gh_A12G1423	4.29465	16.7106	-1.9481	0.000642861	0.00939007	0.00285446	down
																Gh_D08G0952	33.6941	126.86	-1.76186	1.53e-06	3.82e-17	9.52e-20	down
																Gh_A08G1593	144.421	518.285	-1.70921	1.02e-11	9.2e-65	3.56e-77	down
																Gh_A01G0741	6.16165	23.5232	-1.86064	4.92e-08	0.0013669	0.000325181	down
																Gh_D11G3277	6.4816	23.6109	-1.86064	4.92e-08	0.0013669	0.000325181	down
																Gh_D05G3472	16.3572	61.2156	-1.80315	4.06e-06	1.44e-08	5.84e-10	down
																Gh_D11G1599	25.3553	94.0182	-1.77903	2.48e-06	6.48e-13	6.21e-15	down
																Gh_A08G1170	3.27484	12.9301	-1.97612	6.24e-05	0.0308244	0.0121289	down
																Gh_D06G0001	3.33307	12.5155	-1.97612	6.24e-05	0.0308244	0.0121289	down
																Gh_D08G0107	3.49166	12.5508	-1.97612	6.24e-05	0.0308244	0.0121289	down
																Gh_D11G2613	2.91064	12.8579	-1.97612	6.24e-05	0.0308244	0.0121289	down
																Gh_D12G1409	2.76515	12.7673	-1.97612	6.24e-05	0.0308244	0.0121289	down
																Gh_A07G0673	5.29351	19.6451	-1.86064	0.00019996	0.00469835	0.00142662	down
																Gh_D01G1198	4.95768	19.8941	-1.86064	0.00019996	0.00469835	0.00142662	down
																Gh_D05G2829	5.3568	19.9411	-1.86064	0.00019996	0.00469835	0.00142662	down
																Gh_A03G0649	7.32313	27.0626	-1.83464	0.000139134	0.00050786	0.000108493	down
																Gh_A13G1098	7.12139	27.0655	-1.83464	0.000139134	0.00050786	0.000108493	down
																Gh_D13G0415	6.81667	27.0562	-1.83464	0.000139134	0.00050786	0.000108493	down
																Gh_A13G2057	94.0866	351.098	-1.7635	5.33e-11	4.44e-47	9.6e-55	down
																Gh_D02G2029	36.1352	132.328	-1.74056	8.98e-10	1.17e-17	3.06e-20	down
																Gh_A13G0605	4.05415	16.0216	-1.90503	4.28e-05	0.0120991	0.00418843	down
																Gh_D11G0648	4.48092	16.327	-1.90503	4.28e-05	0.0120991	0.00418843	down
																Gh_A03G1542	23.3142	85.5257	-1.76334	1.47e-05	1.2e-11	1.96e-13	down
																Gh_A01G1684	16.4641	59.6946	-1.76753	8.42e-07	3.36e-08	1.88e-09	down
																Gh_D10G1656	15.9274	59.5436	-1.76753	8.42e-07	3.36e-08	1.88e-09	down
																Gh_A01G1839	31.5116	114.892	-1.72885	4.37e-05	3.14e-15	2.04e-17	down
																Gh_A11G0514	4.96207	19.0229	-1.82411	3.41e-05	0.00613093	0.00208067	down
																Gh_A11G0731	12.7655	48.5871	-1.77491	0.000181927	9.36e-07	8.44e-08	down
																Gh_D04G1332	97.3297	355.482	-1.73451	3.3e-08	9.11e-47	4.73e-54	down
																Gh_D13G2458	76.2616	270.688	-1.69489	3.08e-05	5.53e-35	8.1e-40	down
																Gh_D12G2121	41.2926	147.656	-1.71254	7.16e-06	2.18e-19	4.42e-22	down
																Gh_A05G2526	3.1123	12.2435	-1.91953	0.000387993	0.0403066	0.0180572	down
																Gh_A08G1099	2.98719	12.3285	-1.91953	0.000387993	0.0403066	0.0180572	down
																Gh_D07G2242	2.88174	12.1427	-1.91953	0.000387993	0.0403066	0.0180572	down
																Gh_D11G1706	3.17815	12.3819	-1.91953	0.000387993	0.0403066	0.0180572	down
																Gh_D10G0257	12.9327	48.1124	-1.76011	6.12e-06	1.25e-06	1.24e-07	down
																Gh_A12G1933	22.9353	83.5153	-1.72939	2.93e-09	3.74e-11	9.23e-13	down
																Gh_A06G1948	533.053	1585.14	-1.43526	1.31e-07	1.82e-89	6.93e-181	down
																Gh_D02G2066	4.00857	15.6758	-1.86064	0.000474061	0.0157801	0.00610599	down
																Gh_D05G2696	4.22656	15.7141	-1.86064	0.000474061	0.0157801	0.00610599	down
																Gh_A07G0235	4504.5	11973.6	-1.27393	1.3e-09	1.21e-82	0	down
																Gh_D04G0114	26.6682	97.7073	-1.72046	1.98e-09	6.22e-13	9.37e-15	down
																Gh_D09G1298	13.3789	47.9036	-1.74516	6.64e-05	1.67e-06	1.81e-07	down
																Gh_D11G1588	30.7487	110.464	-1.69435	1.69e-06	2.47e-14	2.97e-16	down
																Gh_A04G0483	5.08912	18.8083	-1.78664	0.000543227	0.00800165	0.00303965	down
																Gh_D02G0433	4.97447	18.967	-1.78664	0.000543227	0.00800165	0.00303965	down
																Gh_A11G0646	5.9412	22.42	-1.76753	2.68e-05	0.00308351	0.00100939	down
																Gh_A11G1011	6.00111	22.3704	-1.76753	2.68e-05	0.00308351	0.00100939	down
																Gh_D12G1029	6.19374	22.468	-1.76753	2.68e-05	0.00308351	0.00100939	down
																Gh_A01G1360	339.844	1069.83	-1.51619	4.14e-12	1.12e-80	6e-133	down
																Gh_D06G1428	19.746	70.0439	-1.67826	6.72e-05	4.3e-09	2.77e-10	down
																Gh_A11G0900	7.45559	25.9681	-1.75372	0.000134934	0.00117039	0.000337285	down
																Gh_D11G3227	6.0586	21.6679	-1.73511	0.000171387	0.00403214	0.00147143	down
																Gh_A10G1590	60.998	207.521	-1.63035	7.8e-06	8.96e-26	7.53e-29	down
																Gh_D01G2180	36.6636	127.692	-1.65119	2.07e-05	4e-16	4.18e-18	down
																Gh_D01G1856	4.08648	15.0731	-1.81483	0.000134784	0.0204684	0.00899933	down
																Gh_D09G1769	4.08109	15.3477	-1.81483	0.000134784	0.0204684	0.00899933	down
																Gh_D09G0635	30.1307	104.995	-1.66799	4.05e-07	2.15e-13	4.21e-15	down
																Gh_A12G1062	53.5862	182.499	-1.61751	3.45e-10	1.95e-22	5.08e-25	down
																Gh_D04G0209	5.4795	18.0922	-1.74816	0.000196361	0.0104288	0.00439867	down
																Gh_D11G1236	5.25032	18.1747	-1.74816	0.000196361	0.0104288	0.00439867	down
																Gh_A08G1406	25.3266	86.6948	-1.65973	2.69e-06	4.71e-11	1.93e-12	down
																Gh_D09G1409	15.2628	53.491	-1.69522	0.000153485	5.14e-07	5.85e-08	down
																Gh_A10G1188	24.9413	86.0824	-1.65141	1.17e-05	6.18e-11	2.8e-12	down
																Gh_A10G1311	25.9464	89.5126	-1.65205	1.48e-05	2.27e-11	8.8e-13	down
																Gh_A12G0923	25.8278	89.8847	-1.65205	1.48e-05	2.27e-11	8.8e-13	down
																Gh_D02G1253	19.7082	68.3977	-1.63674	9.55e-05	1.32e-08	1.23e-09	down
																Gh_A13G0170	15.6869	55.6319	-1.66799	7.23e-05	3.25e-07	3.93e-08	down
																Gh_D05G0751	16.4336	55.5139	-1.66799	7.23e-05	3.25e-07	3.93e-08	down
																Gh_A10G0001	3.80781	14.6006	-1.76753	5.72e-05	0.0267164	0.0130488	down
																Gh_A10G1961	3.62285	14.5581	-1.76753	5.72e-05	0.0267164	0.0130488	down
																Gh_D01G2338	4.37265	14.8414	-1.76753	5.72e-05	0.0267164	0.0130488	down
																Gh_D04G0865	4.39073	14.795	-1.76753	5.72e-05	0.0267164	0.0130488	down
																Gh_A11G0903	8.12272	28.6354	-1.71862	0.00010594	0.00057202	0.000161934	down
																Gh_D07G1231	7.85374	28.7269	-1.71862	0.00010594	0.00057202	0.000161934	down
																Gh_D11G3201	47.3866	160.52	-1.63697	1.91e-05	4.62e-20	1.79e-22	down
																Gh_A09G0080	37.7979	128.147	-1.61834	7.98e-06	8.01e-16	1.2e-17	down
																Gh_A06G1217	9.2586	31.9987	-1.69071	8.55e-05	0.000280717	7.74e-05	down
																Gh_D01G1885	29.972	101.813	-1.62617	1.74e-09	1.18e-12	3.9e-14	down
																Gh_D13G1732	205.395	646.767	-1.51942	2.36e-12	1.31e-65	1.09e-80	down
																Gh_D11G0187	64.9744	214.152	-1.58312	4.24e-06	1.06e-25	1.81e-28	down
																Gh_A01G0276	14.6928	52.002	-1.66799	3.44e-05	8.98e-07	1.23e-07	down
																Gh_D01G1933	14.4664	48.1115	-1.6532	6.08e-06	3.28e-06	5.54e-07	down
																Gh_D12G2438	12.9745	44.7112	-1.65205	1.3e-08	9.04e-06	1.75e-06	down
																Gh_A01G0714	29.9333	101.199	-1.61909	5.32e-05	1.57e-12	5.63e-14	down
																Gh_D10G1845	71.7605	234.504	-1.56725	1.03e-05	8.31e-28	1.01e-30	down
																Gh_D11G0748	5.73659	20.8518	-1.66799	0.000190894	0.00687447	0.00303965	down
																Gh_A08G0826	33.5237	111.377	-1.59545	1.58e-05	1.59e-13	5.23e-15	down
																Gh_A03G0016	23.0428	76.6847	-1.60386	1.62e-05	1.96e-09	1.71e-10	down
																Gh_A09G1504	10.0985	34.0005	-1.64724	6.1e-05	0.00018172	5.22e-05	down
																Gh_A11G1399	4.59005	17.8422	-1.70864	0.000639846	0.0135067	0.00626809	down
																Gh_D13G0666	5.38279	17.5781	-1.70864	0.000639846	0.0135067	0.00626809	down
																Gh_A01G1574	28.0544	93.541	-1.60787	1.88e-05	1.62e-11	8.07e-13	down
																Gh_D07G2326	6.51935	22.0075	-1.65205	0.000748733	0.00486712	0.00209206	down
																Gh_A05G1924	50.37	165.904	-1.59183	1.87e-05	4.9e-20	3.21e-22	down
																Gh_A03G0870	13.3544	43.6053	-1.61963	4.61e-05	1.58e-05	3.62e-06	down
																Gh_A01G0388	7.9197	27.905	-1.66799	1.87e-05	0.00100446	0.00033543	down
																Gh_A07G1477	4.40894	14.0774	-1.71862	0.000860501	0.034708	0.0186865	down
																Gh_D09G1364	4.02575	14.284	-1.71862	0.000860501	0.034708	0.0186865	down
																Gh_D10G1882	4.49208	14.3052	-1.71862	0.000860501	0.034708	0.0186865	down
																Gh_D08G1902	181.774	555.144	-1.4709	1.72e-05	1.33e-56	6.87e-66	down
																Gh_D04G1926	46.5062	152.341	-1.57415	1.16e-05	3.54e-18	4.52e-20	down
																Gh_A05G1647	89.8977	283.845	-1.51857	7.99e-07	2.83e-32	2.32e-35	down
																Gh_A07G2341	18.955	62.8753	-1.58999	3.85e-06	1.13e-07	1.66e-08	down
																Gh_D01G0162	7.5053	25.7809	-1.65419	0.000660689	0.0018617	0.000694435	down
																Gh_D01G1604	245.152	741.371	-1.45914	2.13e-08	1.74e-67	7.54e-87	down
																Gh_A03G1705	2610.17	6768.85	-1.23825	5.64e-10	5.49e-79	0	down
																Gh_A10G2119	7.45218	23.8379	-1.63825	2.16e-05	0.0034541	0.00144681	down
																Gh_D02G0694	6.61196	23.6768	-1.63825	2.16e-05	0.0034541	0.00144681	down
																Gh_A06G1130	5.28581	17.3255	-1.66799	4.31e-05	0.0174988	0.00904786	down
																Gh_D06G2148	5.14144	17.3117	-1.66799	4.31e-05	0.0174988	0.00904786	down
																Gh_A13G1379	111.151	354.046	-1.53595	4.08e-11	1.47e-40	6.15e-45	down
																Gh_A08G2105	157.06	485.427	-1.48961	0.00012263	8.14e-52	9.89e-59	down
																Gh_A07G1865	15.6405	52.7881	-1.58856	5.27e-06	1.77e-06	3.48e-07	down
																Gh_A05G0128	12.9324	42.3186	-1.56959	4.06e-05	3.63e-05	1.06e-05	down
																Gh_D05G1532	8.40581	26.7882	-1.61553	0.000100429	0.00171759	0.000680899	down
																Gh_D07G2042	55.1156	171.113	-1.50135	1.37e-06	2.55e-19	5.42e-21	down
																Gh_A07G0838	6.54024	21.1669	-1.58646	0.00100757	0.0082813	0.0042138	down
																Gh_A07G0355	6.61459	23.0683	-1.60787	0.000439174	0.00451467	0.00204886	down
																Gh_A03G1340	3.87915	13.5281	-1.66799	6.78e-05	0.0453607	0.0265875	down
																Gh_A10G1938	4.03592	13.533	-1.66799	6.78e-05	0.0453607	0.0265875	down
																Gh_A12G2042	4.4819	13.6041	-1.66799	6.78e-05	0.0453607	0.0265875	down
																Gh_A13G0253	3.83489	13.7891	-1.66799	6.78e-05	0.0453607	0.0265875	down
																Gh_D05G2206	3.74253	13.5386	-1.66799	6.78e-05	0.0453607	0.0265875	down
																Gh_D11G2623	5.92198	19.5975	-1.5976	0.000215475	0.0116211	0.00607366	down
																Gh_D11G1548	10.1633	32.8579	-1.58311	0.000201131	0.000414384	0.000152255	down
																Gh_D07G0293	3263.67	8645.15	-1.26872	9.29e-10	1.39e-82	0	down
																Gh_D12G0690	23.1725	72.6131	-1.5269	1.77e-05	1.83e-08	2.96e-09	down
																Gh_A12G1255	1291.84	3387.84	-1.25404	1.67e-10	4.67e-64	3.89554769010529e-311	down
																Gh_D11G1764	8.19219	26.1954	-1.58856	0.000125468	0.00224634	0.000962957	down
																Gh_D08G1630	29.4955	91.895	-1.52622	1.93e-05	1.27e-10	1.34e-11	down
																Gh_D01G0331	11.4294	35.4354	-1.55095	1.12e-05	0.000265882	9.98e-05	down
																Gh_A06G1477	123.301	383.474	-1.50132	0.00048874	1.84e-42	6.11e-47	down
																Gh_A09G2229	13.7695	44.1445	-1.52902	3.73e-05	3.05e-05	9.85e-06	down
																Gh_D12G1398	17.1218	54.3986	-1.54136	0.00014766	1.97e-06	4.66e-07	down
																Gh_D02G1442	10.3588	32.431	-1.56108	1.34e-05	0.000542017	0.000214147	down
																Gh_A07G1836	21.7211	68.9905	-1.50973	4.53e-09	6.67e-08	1.32e-08	down
																Gh_A07G1879	5.7756	19.0892	-1.56108	3.69e-05	0.0150622	0.00864429	down
																Gh_A09G1742	5.74324	19.2056	-1.56108	3.69e-05	0.0150622	0.00864429	down
																Gh_A11G1085	5.84584	19.4833	-1.56108	3.69e-05	0.0150622	0.00864429	down
																Gh_D05G2504	6.07099	19.3481	-1.56108	3.69e-05	0.0150622	0.00864429	down
																Gh_A01G1803	86.4859	261.24	-1.46507	3.41e-05	1.8e-28	8.11e-31	down
																Gh_A01G0390	14.9307	48.2585	-1.55366	6.1e-06	8.51e-06	2.23e-06	down
																Gh_A05G2165	6.54801	20.5829	-1.55252	0.00111085	0.0107378	0.00589304	down
																Gh_D01G2043	57.6572	175.743	-1.4621	3.56e-10	3.42e-19	1.12e-20	down
																Gh_D07G1439	20.2276	62.7453	-1.51599	3.84e-06	2.89e-07	6.32e-08	down
																Gh_A07G0588	6.61917	22.8368	-1.57685	0.000177262	0.0058788	0.00291637	down
																Gh_D11G2500	40.4496	122.049	-1.47535	1.01e-09	1.55e-13	1.24e-14	down
																Gh_D10G2388	15.3277	47.8377	-1.53871	6.64e-05	1.12e-05	3.19e-06	down
																Gh_A12G1582	9.99552	31.5922	-1.53871	8.68e-05	0.000716874	0.000301339	down
																Gh_A12G1700	5.51206	17.8475	-1.57113	0.00212588	0.0209855	0.01249	down
																Gh_A06G1246	42.0518	128.57	-1.47955	3.4e-07	2.64e-14	1.8e-15	down
																Gh_A12G2400	9.13832	28.5168	-1.54869	0.00010818	0.00145552	0.000642898	down
																Gh_D05G3933	7.21727	22.3029	-1.54514	6.04e-05	0.00764454	0.00408564	down
																Gh_D12G2715	6.63567	22.4282	-1.54514	6.04e-05	0.00764454	0.00408564	down
																Gh_D01G0652	10.7471	34.4426	-1.50973	6.19e-05	0.000457458	0.000197246	down
																Gh_A04G0830	72.2552	215.596	-1.44561	2.68e-07	3.45e-23	6.22e-25	down
																Gh_A05G2474	5.42307	16.1477	-1.5831	4.97e-05	0.0296216	0.0182028	down
																Gh_D07G0362	4.72723	16.3221	-1.5831	4.97e-05	0.0296216	0.0182028	down
																Gh_D13G2223	5.08511	16.0173	-1.5831	4.97e-05	0.0296216	0.0182028	down
																Gh_D05G1242	19.7201	61.1556	-1.48123	3.94e-06	6.63e-07	1.76e-07	down
																Gh_A11G2111	6.52349	20.0621	-1.51775	0.0011341	0.0138399	0.00831004	down
																Gh_A12G0562	682.906	1672.72	-1.15535	3.46e-11	1.95e-48	7.05e-134	down
																Gh_A13G0672	40.2889	119.851	-1.4456	1.47e-06	6.15e-13	6.81e-14	down
																Gh_D02G1289	6.34461	18.5052	-1.5236	0.000594712	0.0194279	0.0120385	down
																Gh_D08G1788	454.902	1208.98	-1.27227	9e-12	7.91e-62	1.31e-113	down
																Gh_D13G1694	70.3504	207.465	-1.42833	1.94e-05	5.86e-22	1.69e-23	down
																Gh_A11G1591	8.52765	26.7606	-1.52806	0.000608729	0.00269739	0.00131662	down
																Gh_A13G1726	41.0532	122.545	-1.4456	4.11e-05	2.93e-13	3.1e-14	down
																Gh_A01G1855	16.7301	52.9138	-1.5011	5.3e-06	4.54e-06	1.33e-06	down
																Gh_A12G0933	13.5611	42.605	-1.47955	4.9e-05	6.97e-05	2.76e-05	down
																Gh_D03G0942	8.12336	25.2075	-1.53306	0.000138366	0.0038496	0.00191747	down
																Gh_D06G1814	124.918	374.361	-1.44378	3.02e-11	1.53e-39	3.98e-43	down
																Gh_A11G0177	86.4729	252.873	-1.41739	2.19e-06	1.93e-26	2.61e-28	down
																Gh_D02G0399	23.0676	69.4232	-1.45602	4.77e-05	1.28e-07	3.31e-08	down
																Gh_A02G1669	21.1121	63.084	-1.45701	0.000110439	5.52e-07	1.59e-07	down
																Gh_D05G2687	7.48353	21.7442	-1.51272	0.000224438	0.00987585	0.0056961	down
																Gh_D12G2171	7.44713	21.8837	-1.51272	0.000224438	0.00987585	0.0056961	down
																Gh_D03G0780	13.0699	39.0793	-1.46398	0.000270721	0.000187492	8.39e-05	down
																Gh_D10G2107	13.0239	39.1702	-1.46398	0.000270721	0.000187492	8.39e-05	down
																Gh_D02G2126	2891.25	6896.39	-1.11766	7.48e-10	1.15e-64	0	down
																Gh_A03G1211	28.4769	83.7783	-1.4456	2.81e-09	4.3e-09	9.06e-10	down
																Gh_A13G1991	10.4792	30.9206	-1.49291	0.000234164	0.00122637	0.00058733	down
																Gh_A03G1989	4.68761	15.8033	-1.53871	0.000557761	0.0387105	0.0253063	down
																Gh_A05G1541	5.2759	15.5451	-1.53871	0.000557761	0.0387105	0.0253063	down
																Gh_D11G1151	4.98071	15.9385	-1.53871	0.000557761	0.0387105	0.0253063	down
																Gh_A03G1332	10.7264	33.2846	-1.4673	6.63e-05	0.000788244	0.000383532	down
																Gh_D09G0001	7.50087	23.0193	-1.50834	0.00117651	0.00701597	0.0039207	down
																Gh_A12G2191	8.38442	24.8513	-1.5045	0.000120502	0.00494635	0.00269804	down
																Gh_A10G1862	21.5086	63.6665	-1.43437	0.000131661	6.63e-07	2.09e-07	down
																Gh_D07G1522	14.2904	41.8937	-1.4456	0.000128311	0.000120163	5.36e-05	down
																Gh_A05G3491	96.6779	277.654	-1.3797	0.000111166	5.15e-28	8.3e-30	down
																Gh_A04G0277	7.45303	21.0079	-1.47955	0.000207157	0.0126982	0.00791015	down
																Gh_A12G1559	9.30203	27.1625	-1.47207	0.000118454	0.00323291	0.00174867	down
																Gh_A11G2206	112.234	315.625	-1.35712	4.98e-11	4.82e-31	5.38e-33	down
																Gh_D06G1437	43.9389	128.269	-1.40683	7.58e-06	2.2e-13	3e-14	down
																Gh_A01G1933	26.7768	78.6608	-1.40953	2.54e-06	2.66e-08	7.54e-09	down
																Gh_D05G0131	36.0733	105.076	-1.41181	1.65e-05	4.71e-11	8.78e-12	down
																Gh_A08G2343	31.2997	90.0494	-1.40629	5.42e-06	1.87e-09	4.46e-10	down
																Gh_A08G0348	10.8338	32.6942	-1.4456	0.000206607	0.00103504	0.000529184	down
																Gh_A03G1441	36.5872	107.2	-1.39938	0.000129594	3.93e-11	7.74e-12	down
																Gh_D05G1596	222.171	591.866	-1.27623	2.14e-12	2.77e-48	5.71e-56	down
																Gh_A09G1746	9.84087	29.5265	-1.4456	0.000481862	0.00208729	0.00113454	down
																Gh_A11G0166	10.1833	29.5062	-1.4456	0.000481862	0.00208729	0.00113454	down
																Gh_D11G0758	8.27648	24.4564	-1.47535	0.000378275	0.00643243	0.00372987	down
																Gh_A07G0504	36.6387	106.608	-1.39265	1.51e-09	5.11e-11	1.07e-11	down
																Gh_A01G0900	7.42564	20.7851	-1.4456	0.000254417	0.0164611	0.010876	down
																Gh_D09G0416	6.68841	20.766	-1.4456	0.000254417	0.0164611	0.010876	down
																Gh_D01G1488	10.9728	32.298	-1.42358	1.38e-05	0.00134877	0.000732466	down
																Gh_A06G0050	48.8246	139.785	-1.37521	2.83e-07	3.73e-14	5.73e-15	down
																Gh_D01G1119	26.9407	76.8358	-1.37254	1.61e-05	7.89e-08	2.78e-08	down
																Gh_D07G1830	25.7077	73.868	-1.36965	3.03e-05	1.64e-07	6.11e-08	down
																Gh_A01G1990	7.5972	23.688	-1.4456	5.38e-08	0.00836309	0.0051682	down
																Gh_D06G1386	8.40475	23.7239	-1.4456	5.38e-08	0.00836309	0.0051682	down
																Gh_D05G1425	14.4496	40.0247	-1.39313	1.74e-06	0.00026655	0.000142627	down
																Gh_A07G0271	6.45665	17.7379	-1.4456	0.000719018	0.0324666	0.0230098	down
																Gh_D09G1663	5.62566	17.6547	-1.4456	0.000719018	0.0324666	0.0230098	down
																Gh_D11G3395	6.11373	17.8579	-1.4456	0.000719018	0.0324666	0.0230098	down
																Gh_D09G0078	31.6167	90.7057	-1.36843	4.05e-07	3.5e-09	1.04e-09	down
																Gh_A10G1483	21.3271	59.2264	-1.36314	9.15e-05	4.9e-06	2.23e-06	down
																Gh_A03G0495	14.054	39.5492	-1.37521	1.74e-06	0.000347819	0.00019437	down
																Gh_D13G1180	10.2471	29.0575	-1.42135	1.69e-05	0.00270594	0.00157006	down
																Gh_D06G1001	10.9922	31.5808	-1.40121	8.98e-05	0.00174424	0.00100503	down
																Gh_A10G0885	14.7612	43.4232	-1.39669	4e-05	0.000130733	6.61e-05	down
																Gh_A11G3118	31.6272	90.3211	-1.36049	5.43e-06	4.55e-09	1.44e-09	down
																Gh_D02G0696	25.6548	72.8062	-1.35002	2.03e-05	2.83e-07	1.16e-07	down
																Gh_D09G1931	25.908	72.99	-1.35002	2.03e-05	2.83e-07	1.16e-07	down
																Gh_D12G1798	74.798	204.072	-1.30779	1.46e-06	2.71e-19	4e-20	down
																Gh_D03G1222	23.3212	64.5691	-1.35945	4.3e-06	1.49e-06	6.38e-07	down
																Gh_D12G0691	28.6885	81.1802	-1.35139	6.42e-06	4.08e-08	1.53e-08	down
																Gh_D06G2226	20.4538	56.3098	-1.35889	7.69e-09	1.02e-05	4.86e-06	down
																Gh_A01G1495	7.21063	20.0107	-1.41084	0.000234927	0.0210639	0.0149693	down
																Gh_A05G2553	7.44569	20.353	-1.41084	0.000234927	0.0210639	0.0149693	down
																Gh_D05G0532	7.42647	20.0694	-1.41084	0.000234927	0.0210639	0.0149693	down
																Gh_D11G1273	6.889	20.0112	-1.41084	0.000234927	0.0210639	0.0149693	down
																Gh_D05G0950	103.51	278.86	-1.29131	0.000142565	9.62e-26	6.8e-27	down
																Gh_A09G2385	10.16	28.8145	-1.39669	0.000112649	0.00352045	0.00215455	down
																Gh_A12G2473	38.798	108.25	-1.33679	1.53e-05	1.33e-10	4.03e-11	down
																Gh_D02G1217	24.867	69.4465	-1.33572	4.8e-05	7.68e-07	3.45e-07	down
																Gh_D12G1841	41.6924	116.22	-1.33251	4.42e-05	2.56e-11	7.29e-12	down
																Gh_A11G3262	11.6252	33.9917	-1.36314	7.93e-05	0.00145173	0.000889007	down
																Gh_A12G1018	98.0865	263.482	-1.28762	1.17e-05	2.96e-24	2.78e-25	down
																Gh_A09G0578	12.9342	36.4763	-1.35002	1.11e-05	0.000932714	0.000563715	down
																Gh_D03G0476	6.33246	17.2779	-1.40496	4.91e-05	0.042059	0.0315992	down
																Gh_D09G1479	6.11768	17.1017	-1.40496	4.91e-05	0.042059	0.0315992	down
																Gh_A12G0888	14.8043	42.2461	-1.36314	4.23e-05	0.000220374	0.000124202	down
																Gh_D11G3035	54.1035	146.318	-1.30051	6.03e-10	9.35e-14	2.54e-14	down
																Gh_A06G1751	16.9194	47.6704	-1.35814	6.86e-05	6.85e-05	3.64e-05	down
																Gh_D12G1222	128.779	351.763	-1.30893	0.00489057	9.23e-33	1.14e-34	down
																Gh_A07G0209	9.69558	28.1882	-1.3716	9.54e-05	0.00454813	0.00295723	down
																Gh_A08G0926	9.89331	28.2432	-1.3716	9.54e-05	0.00454813	0.00295723	down
																Gh_A11G0232	33.5202	91.5987	-1.31811	5.03e-05	7.55e-09	2.98e-09	down
																Gh_D10G0475	22.4088	60.7568	-1.33194	2.55e-05	5.25e-06	2.65e-06	down
																Gh_A11G2673	29.0912	79.4268	-1.31554	7.84e-06	1.2e-07	5.42e-08	down
																Gh_A12G0064	20.7588	57.2371	-1.31381	2.81e-05	1.43e-05	7.89e-06	down
																Gh_A06G1770	7.3753	19.967	-1.37521	0.000292892	0.0273915	0.0204469	down
																Gh_A08G0636	7.49524	19.663	-1.37521	0.000292892	0.0273915	0.0204469	down
																Gh_A11G3209	13.3831	35.8659	-1.33012	0.000176698	0.00120489	0.00076791	down
																Gh_A05G1099	95.7154	253.528	-1.26439	1.06e-05	7.91e-23	1.19e-23	down
																Gh_A08G1336	78.2072	207.066	-1.27222	1.81e-05	7.41e-19	1.57e-19	down
																Gh_D11G1672	25.2259	67.9666	-1.30425	5.13e-05	1.71e-06	8.86e-07	down
																Gh_D05G0701	13.5152	36.7242	-1.3152	0.000441703	0.0010965	0.000712477	down
																Gh_D13G0438	57.4068	152.411	-1.28042	5.38e-10	5.05e-14	1.55e-14	down
																Gh_A08G0736	69.8346	183.071	-1.251	1.68e-05	2.57e-16	8.01e-17	down
																Gh_A05G1365	9.83242	27.8889	-1.34607	2.02e-05	0.00586079	0.00401762	down
																Gh_A05G3730	116.495	298.555	-1.22671	5.38e-11	1.18e-25	1.71e-26	down
																Gh_A06G0044	20.9596	56.8465	-1.30121	0.000138845	1.85e-05	1.08e-05	down
																Gh_D11G3083	16.6655	46.6039	-1.32777	4.44e-05	0.000116457	6.85e-05	down
																Gh_A11G2314	35.6366	96.8145	-1.29063	2.88e-05	4.59e-09	2.01e-09	down
																Gh_A13G0821	333.45	821.951	-1.16535	1.5e-12	9.79e-50	8.54e-67	down
																Gh_D09G1109	13.4252	35.0077	-1.30995	1.19e-05	0.00155569	0.00103706	down
																Gh_D10G2243	13.8571	37.8675	-1.30121	2.7e-05	0.000999617	0.000659722	down
																Gh_D01G2036	7.16295	19.1668	-1.33869	8.73e-05	0.0351994	0.0275542	down
																Gh_D05G1551	7.08185	19.4979	-1.33869	8.73e-05	0.0351994	0.0275542	down
																Gh_A07G1611	38.8042	104.706	-1.28948	3.91e-07	8.71e-10	3.59e-10	down
																Gh_D07G0328	7.80685	22.2915	-1.35249	3.06e-05	0.0176414	0.0131835	down
																Gh_A06G1157	46.3341	121.655	-1.26782	3e-05	4.32e-11	1.82e-11	down
																Gh_D12G1452	32.7225	87.6145	-1.27568	3.35e-05	4.09e-08	2.08e-08	down
																Gh_D07G0734	34.4601	90.1083	-1.27302	5.49e-06	2.58e-08	1.31e-08	down
																Gh_D11G2423	8.68546	24.5256	-1.33457	0.000128138	0.0115883	0.00849405	down
																Gh_D13G0396	8.73491	24.7006	-1.33457	0.000128138	0.0115883	0.00849405	down
																Gh_D05G2420	7.53597	20.6038	-1.34607	0.00117911	0.0249496	0.0190739	down
																Gh_D01G1498	12.8972	34.984	-1.28948	7.62e-05	0.0020074	0.00141017	down
																Gh_D11G1631	13.4163	34.9339	-1.28948	7.62e-05	0.0020074	0.00141017	down
																Gh_D05G0005	37.2519	97.5796	-1.2659	1.91e-09	6.37e-09	3.14e-09	down
																Gh_D09G1728	10.6657	29.8032	-1.3081	0.000506889	0.00485314	0.00345777	down
																Gh_A09G0884	22.8646	61.4795	-1.27959	4.1e-06	9.59e-06	5.72e-06	down
																Gh_D07G2077	11.8774	32.3648	-1.29804	1.45e-05	0.00312627	0.00220775	down
																Gh_A09G2077	64.4669	165.286	-1.23133	4.16e-10	2.03e-14	8.59e-15	down
																Gh_A13G2336	32.0248	84.1208	-1.26152	3.58e-05	1.11e-07	6.15e-08	down
																Gh_D07G0417	15.675	42.8521	-1.2869	5.19e-05	0.000400187	0.000268808	down
																Gh_D13G2081	8.42999	21.6576	-1.32007	0.000198066	0.0226304	0.0179251	down
																Gh_A11G1456	19.5296	51.7288	-1.27568	0.000112509	7.1e-05	4.64e-05	down
																Gh_A03G2171	140.06	361.284	-1.22931	3.99e-06	8.67e-31	3.86e-32	down
																Gh_A05G0066	13.1395	34.1222	-1.26872	6.66e-05	0.00257623	0.00188624	down
																Gh_A11G1300	12.5537	34.0526	-1.26872	6.66e-05	0.00257623	0.00188624	down
																Gh_D11G1320	13.0553	34.4226	-1.26872	6.66e-05	0.00257623	0.00188624	down
																Gh_D11G3526	48.1179	124.981	-1.24146	1.35e-05	4.82e-11	2.36e-11	down
																Gh_A09G1405	45.9056	118.66	-1.2319	8.44e-06	2.05e-10	1.1e-10	down
																Gh_D04G1975	11.9291	31.7551	-1.27568	9.43e-05	0.00403209	0.00297816	down
																Gh_D08G1130	12.2206	31.5848	-1.27568	9.43e-05	0.00403209	0.00297816	down
																Gh_A01G1393	6.99027	18.9001	-1.30121	0.000741144	0.0453206	0.0366687	down
																Gh_D11G0233	206.447	507.509	-1.16319	4.88e-07	8.66e-38	3.61e-41	down
																Gh_D11G3212	30.0525	77.6808	-1.23915	3.46e-09	6.18e-07	3.85e-07	down
																Gh_A11G0919	58.1067	148.045	-1.21698	5.75e-10	9.56e-13	4.92e-13	down
																Gh_A10G1534	28.653	75.4439	-1.24106	1.74e-05	9.79e-07	6.2e-07	down
																Gh_A05G1424	434.28	974.116	-1.02905	5.33e-12	5.38e-41	5.97e-64	down
																Gh_D10G1374	8.58593	24.1367	-1.30542	0.000405553	0.0148284	0.0113859	down
																Gh_A12G1327	60.5731	156.163	-1.21992	2.23e-07	1.81e-13	8.74e-14	down
																Gh_D08G2475	330.155	795.088	-1.13106	5.85e-10	7.48e-47	1.79e-61	down
																Gh_A05G1271	10.9086	29.3938	-1.28385	1.79e-05	0.00621107	0.00466034	down
																Gh_D11G1456	24.3354	62.3104	-1.24146	6.14e-09	1.32e-05	8.85e-06	down
																Gh_D09G1401	35.5874	93.0748	-1.23761	3.09e-05	2.88e-08	1.7e-08	down
																Gh_D02G2049	21.2454	54.9956	-1.24968	8.64e-09	5.25e-05	3.61e-05	down
																Gh_D03G0294	21.255	54.81	-1.24968	8.64e-09	5.25e-05	3.61e-05	down
																Gh_D01G2254	38.6318	100.577	-1.23345	1.77e-09	7.09e-09	4.1e-09	down
																Gh_A09G2418	13.4111	33.9285	-1.24766	8.3e-05	0.00331049	0.00252899	down
																Gh_A12G0226	13.2044	33.9969	-1.24766	8.3e-05	0.00331049	0.00252899	down
																Gh_A05G3496	53.6998	136.774	-1.20379	7.3e-10	1.39e-11	8.14e-12	down
																Gh_A08G0954	15.0572	39.316	-1.25753	0.00029066	0.00105701	0.000757828	down
																Gh_D02G1705	17.4703	44.071	-1.24891	4.02e-05	0.000422474	0.000304775	down
																Gh_D05G0122	16.8192	44.1745	-1.24891	4.02e-05	0.000422474	0.000304775	down
																Gh_D10G1162	8.51187	22.6096	-1.29674	0.000954196	0.0208021	0.0166224	down
																Gh_D03G1859	42.7669	111.345	-1.23528	3.58e-07	8.45e-10	4.53e-10	down
																Gh_A11G0440	9.65239	26.2422	-1.26663	0.000139726	0.0122774	0.00974692	down
																Gh_D10G1437	9.7523	26.2718	-1.26663	0.000139726	0.0122774	0.00974692	down
																Gh_D11G2214	9.79544	26.358	-1.26663	0.000139726	0.0122774	0.00974692	down
																Gh_D01G0987	7.96769	21.2966	-1.2869	0.000179288	0.0290853	0.0238621	down
																Gh_D01G2339	44.5047	113.533	-1.2178	2.73e-05	8.03e-10	4.68e-10	down
																Gh_D11G2333	10.973	28.8396	-1.25919	0.00011969	0.00796959	0.0061826	down
																Gh_D11G2879	8.82248	23.6488	-1.27568	5.8e-08	0.0188373	0.0152908	down
																Gh_A03G1334	21.9192	56.6244	-1.2341	0.000142943	4.28e-05	3.05e-05	down
																Gh_A13G2059	13.0317	33.0785	-1.22629	7.23e-05	0.0042301	0.0033538	down
																Gh_A10G2253	21.028	53.723	-1.22321	9.16e-09	8.79e-05	6.51e-05	down
																Gh_A13G1610	15.8398	41.4689	-1.23568	1.7e-08	0.000862592	0.000643718	down
																Gh_D01G1467	15.8401	41.3128	-1.23568	1.7e-08	0.000862592	0.000643718	down
																Gh_A06G0474	29.0643	73.4179	-1.20233	7.93e-06	2.76e-06	2.03e-06	down
																Gh_A05G0572	19.4766	48.7676	-1.22742	0.000195152	0.000217886	0.00016281	down
																Gh_D03G1246	25.6187	65.6391	-1.20459	2.58e-05	1.12e-05	8.34e-06	down
																Gh_D03G1842	226.243	534.031	-1.10294	1.19e-08	4.45e-36	1.38e-39	down
																Gh_A12G1098	305.765	729.568	-1.11589	7.45e-13	3.11e-44	3.92e-55	down
																Gh_A11G1596	9.87004	25.5667	-1.23915	0.000123546	0.0156994	0.0130488	down
																Gh_A11G2110	12.2683	30.6127	-1.22987	0.000259191	0.00654962	0.00530024	down
																Gh_D09G1818	12.2993	30.9037	-1.22987	0.000259191	0.00654962	0.00530024	down
																Gh_A08G1439	8.73376	23.0969	-1.2453	0.000458277	0.0240165	0.0203988	down
																Gh_D06G1573	21.7982	55.891	-1.20856	7.76e-05	7.12e-05	5.44e-05	down
																Gh_A04G0832	189.347	454.314	-1.12678	7.52e-12	4.56e-33	6.62e-35	down
																Gh_A05G0203	53.9231	132.511	-1.16104	1.95e-05	1.06e-10	8.08e-11	down
																Gh_D06G2270	32.8975	82.3921	-1.18257	1.54e-05	7.12e-07	5.43e-07	down
																Gh_D13G0445	41.529	103.984	-1.18604	7.99e-05	1.17e-08	8.47e-09	down
																Gh_A10G0545	37.7176	94.7848	-1.18257	3.06e-05	6.87e-08	5.15e-08	down
																Gh_A05G3863	30.3286	74.0796	-1.17292	3.25e-06	3.71e-06	3e-06	down
																Gh_D02G2370	12.4016	30.1207	-1.20641	3.5e-08	0.00837623	0.00697851	down
																Gh_A06G1669	31.501	77.9522	-1.16876	3.83e-05	2.1e-06	1.71e-06	down
																Gh_A13G0858	21.0326	52.9799	-1.19624	5.75e-06	0.000145432	0.00011513	down
																Gh_A05G1547	26.1479	64.8092	-1.18257	7.32e-06	1.86e-05	1.48e-05	down
																Gh_A01G0005	11.4599	27.8922	-1.20856	2.16e-05	0.0128052	0.0109502	down
																Gh_D01G2263	10.8218	27.6257	-1.20856	2.16e-05	0.0128052	0.0109502	down
																Gh_A12G1171	10.301	25.3165	-1.21114	0.00015798	0.0198785	0.0173689	down
																Gh_A12G1808	10.075	25.3591	-1.21114	0.00015798	0.0198785	0.0173689	down
																Gh_D13G1819	9.55114	25.1506	-1.21114	0.00015798	0.0198785	0.0173689	down
																Gh_D12G2271	14.8277	37.2669	-1.18257	2.99e-05	0.0028217	0.0023732	down
																Gh_D12G2247	17.8845	44.904	-1.18257	1.45e-08	0.000735829	0.000601277	down
																Gh_D05G0689	18.8478	47.4847	-1.18257	1.84e-05	0.000464409	0.000381084	down
																Gh_A03G2127	26.3983	63.5598	-1.1602	2.81e-05	3.06e-05	2.63e-05	down
																Gh_A12G2726	7.73689	20.3881	-1.21819	0.000207584	0.0478133	0.0416983	down
																Gh_D05G3681	7.70044	20.2886	-1.21819	0.000207584	0.0478133	0.0416983	down
																Gh_D10G1130	7.75838	20.3846	-1.21819	0.000207584	0.0478133	0.0416983	down
																Gh_D12G0651	8.43907	20.1519	-1.21819	0.000207584	0.0478133	0.0416983	down
																Gh_D13G0188	11.039	27.1823	-1.18257	0.000134566	0.0163439	0.0144679	down
																Gh_A11G1594	14.2256	34.1685	-1.16181	7.04e-05	0.00561253	0.00492319	down
																Gh_D10G1748	13.7513	34.114	-1.16181	7.04e-05	0.00561253	0.00492319	down
																Gh_D12G1714	14.0688	34.4864	-1.16181	7.04e-05	0.00561253	0.00492319	down
																Gh_A13G2023	86.4968	205.808	-1.12089	1.19e-06	1.16e-15	1.01e-15	down
																Gh_D07G2304	8.82567	22.8708	-1.21428	0.000163937	0.0306546	0.0268925	down
																Gh_D07G1809	35.2576	85.3732	-1.14921	3.9e-06	7.7e-07	6.56e-07	down
																Gh_A13G1144	16.4303	39.1667	-1.16442	0.000305057	0.00231573	0.00197298	down
																Gh_D07G0574	51.4381	122.449	-1.12485	4.28e-07	1.97e-09	1.82e-09	down
																Gh_A06G1838	12.9549	31.789	-1.1602	0.0001004	0.00872977	0.00772796	down
																Gh_D06G0520	13.2136	31.7361	-1.1602	0.0001004	0.00872977	0.00772796	down
																Gh_D08G1949	67.347	159.068	-1.11197	1.13e-05	4.97e-12	4.93e-12	down
																Gh_D05G1113	26.1076	63.0312	-1.14888	0.000124835	3.95e-05	3.47e-05	down
																Gh_A10G0257	10.3069	24.7567	-1.18257	0.000139548	0.0252481	0.0227683	down
																Gh_A05G1497	18.1524	43.7018	-1.15015	5.25e-05	0.00120489	0.00103933	down
																Gh_D05G0774	14.0321	33.8718	-1.14075	8.82e-05	0.00710551	0.00636228	down
																Gh_D06G1444	14.0654	33.6102	-1.14075	8.82e-05	0.00710551	0.00636228	down
																Gh_D08G2303	14.2287	33.9573	-1.14075	8.82e-05	0.00710551	0.00636228	down
																Gh_A01G0531	8.68045	22.2788	-1.18257	3.37e-05	0.0389288	0.0349538	down
																Gh_A10G0878	9.08733	22.4662	-1.18257	3.37e-05	0.0389288	0.0349538	down
																Gh_D05G0068	8.96706	22.1482	-1.18257	3.37e-05	0.0389288	0.0349538	down
																Gh_D06G1519	9.18197	22.4007	-1.18257	3.37e-05	0.0389288	0.0349538	down
																Gh_D12G1323	9.01267	22.1959	-1.18257	3.37e-05	0.0389288	0.0349538	down
																Gh_A12G0296	10.672	26.6495	-1.15609	0.000119952	0.0207081	0.0189678	down
																Gh_D02G2123	10.9906	26.7247	-1.15609	0.000119952	0.0207081	0.0189678	down
																Gh_D10G1484	121.426	278.299	-1.06335	5.01e-05	1.82e-19	2.15e-19	down
																Gh_D05G3790	33.4672	78.2261	-1.11087	8.14e-05	5.28e-06	5.12e-06	down
																Gh_D13G0786	326.463	743.994	-1.052	1.28e-08	1.99e-40	8.99e-51	down
																Gh_A03G2013	15.3256	36.2296	-1.14357	1.24e-05	0.00459619	0.0040996	down
																Gh_D10G0579	97.4477	225.781	-1.08092	1.47e-06	2.81e-16	3.3e-16	down
																Gh_D05G2834	23.4127	55.0471	-1.13149	0.000160376	0.00020047	0.000182147	down
																Gh_A07G1868	13.5363	32.3434	-1.12812	0.000365345	0.00993873	0.00921635	down
																Gh_D09G1399	54.2343	125.108	-1.0773	3.73e-06	4.46e-09	5.13e-09	down
																Gh_A12G2584	62.6057	146.139	-1.07812	6.05e-10	1.38e-10	1.64e-10	down
																Gh_D02G2150	16.2361	38.1368	-1.12743	7.01e-05	0.00375298	0.00339186	down
																Gh_D01G1585	9.20517	21.5719	-1.15015	0.000220112	0.0498202	0.0460579	down
																Gh_D01G2250	9.14543	21.6479	-1.15015	0.000220112	0.0498202	0.0460579	down
																Gh_D02G2038	8.74164	21.8619	-1.15015	0.000220112	0.0498202	0.0460579	down
																Gh_A04G1174	61.5323	142.246	-1.07295	4.95e-05	3.14e-10	3.79e-10	down
																Gh_A03G1831	9.5769	24.3481	-1.15342	0.000445731	0.0318455	0.0297307	down
																Gh_D07G0955	10.2075	24.308	-1.15342	0.000445731	0.0318455	0.0297307	down
																Gh_A03G1543	11.9826	28.6024	-1.13366	0.000129495	0.0168802	0.0158995	down
																Gh_D12G0226	10.8038	26.097	-1.12913	0.000152491	0.0261893	0.0247689	down
																Gh_A01G1994	54.3345	124.203	-1.06576	2.8e-07	7.2e-09	8.69e-09	down
																Gh_D02G1616	26.6656	63.8639	-1.10575	2.52e-05	6.67e-05	6.49e-05	down
																Gh_A03G1921	23.6225	56.7066	-1.10857	0.000151694	0.000206271	0.000196497	down
																Gh_D12G0830	24.1192	56.6138	-1.10857	0.000151694	0.000206271	0.000196497	down
																Gh_D10G1310	37.5504	89.027	-1.09653	2.27e-06	1.08e-06	1.1e-06	down
																Gh_A10G0372	12.8872	30.5367	-1.1144	0.000279036	0.0138246	0.0131505	down
																Gh_D06G1859	13.2139	30.7361	-1.1144	0.000279036	0.0138246	0.0131505	down
																Gh_A07G1315	19.9249	47.0204	-1.10857	1.92e-05	0.00101007	0.000939356	down
																Gh_A12G2302	19.266	44.7567	-1.10456	1.52e-08	0.00157519	0.00147704	down
																Gh_D11G0244	23.9146	56.3404	-1.09586	8.61e-09	0.000262718	0.000256786	down
																Gh_A08G0219	77.1979	174.81	-1.04507	3.36e-10	4.9e-12	7.19e-12	down
																Gh_D08G0391	18.4441	42.4151	-1.10011	4.79e-05	0.00246476	0.00232501	down
																Gh_A05G2556	29.2755	67.3059	-1.07947	5.41e-09	5.48e-05	5.69e-05	down
																Gh_D02G0097	9.96426	23.8936	-1.12367	6.42e-08	0.0403066	0.0381056	down
																Gh_D08G2130	9.61472	23.9276	-1.12367	6.42e-08	0.0403066	0.0381056	down
																Gh_D09G1866	10.2525	23.7347	-1.12367	6.42e-08	0.0403066	0.0381056	down
																Gh_D13G0290	9.83339	23.7165	-1.12367	6.42e-08	0.0403066	0.0381056	down
																Gh_A07G0744	12.3323	28.2789	-1.10857	0.00011086	0.0211483	0.0205805	down
																Gh_A13G2107	38.148	88.3257	-1.08032	2.69e-09	1.77e-06	1.89e-06	down
																Gh_D06G0124	57.0909	129.779	-1.05012	1.34e-05	4.7e-09	6.11e-09	down
																Gh_D02G0084	12.7368	30.078	-1.09094	3.79e-08	0.0173068	0.0171735	down
																Gh_D05G3807	12.5693	30.2898	-1.09094	3.79e-08	0.0173068	0.0171735	down
																Gh_A07G1330	10.7561	25.532	-1.10165	0.000135834	0.0328278	0.0321641	down
																Gh_A03G1179	33.7129	77.2698	-1.0493	1.53e-05	1.82e-05	2.08e-05	down
																Gh_A05G0863	149.399	339.74	-1.05095	2.92e-11	4.11e-23	3.45e-23	down
																Gh_D12G1140	40.5768	94.2955	-1.06533	2.53e-06	9.02e-07	1.03e-06	down
																Gh_A02G1758	48.4055	110.173	-1.06358	1.69e-06	7.23e-08	8.53e-08	down
																Gh_D05G1617	19.234	43.7885	-1.07214	5.53e-05	0.00251807	0.00248304	down
																Gh_A13G1912	52.4849	117.042	-1.03672	1.5e-05	4.75e-08	6.32e-08	down
																Gh_A07G2230	14.2176	32.0719	-1.07565	1.65e-05	0.0141489	0.0140675	down
																Gh_D08G0300	11.8368	27.8538	-1.08303	2.37e-05	0.0268608	0.0265193	down
																Gh_D11G0237	11.7648	27.7044	-1.08303	2.37e-05	0.0268608	0.0265193	down
																Gh_A03G0323	32.1204	72.4134	-1.04055	3.35e-06	4.58e-05	5.21e-05	down
																Gh_A04G0867	32.7231	74.9308	-1.04506	1.63e-05	2.88e-05	3.3e-05	down
																Gh_A03G2183	44.961	103.172	-1.06227	1.77e-09	2.29e-07	2.66e-07	down
																Gh_A11G1072	26.089	59.3196	-1.05502	0.000109782	0.000272981	0.000291254	down
																Gh_A08G1784	21.445	48.1595	-1.06823	7.26e-06	0.00130705	0.00129935	down
																Gh_A13G1845	16.2025	36.9591	-1.07009	0.000194458	0.00749512	0.00739914	down
																Gh_D05G2909	15.6093	36.6146	-1.07009	0.000194458	0.00749512	0.00739914	down
																Gh_D07G2204	12.9463	29.9597	-1.06709	0.000589595	0.0215834	0.0219163	down
																Gh_A09G1634	25.7896	58.9148	-1.04284	2.74e-06	0.000346344	0.000371947	down
																Gh_D03G1020	14.0704	31.6658	-1.05328	0.000108625	0.0175705	0.0181679	down
																Gh_A12G0004	50.3622	112.996	-1.03696	9.87e-06	9.53e-08	1.23e-07	down
																Gh_A05G1257	15.1395	34.4537	-1.06227	7.68e-05	0.0115517	0.0115326	down
																Gh_A06G1351	14.6013	34.3292	-1.06227	7.68e-05	0.0115517	0.0115326	down
																Gh_A10G1374	15.2484	34.4922	-1.06227	7.68e-05	0.0115517	0.0115326	down
																Gh_D04G1251	15.4102	34.2839	-1.06227	7.68e-05	0.0115517	0.0115326	down
																Gh_A06G0622	11.7556	27.4975	-1.05704	0.000147853	0.0336051	0.0337093	down
																Gh_D13G0037	13.5031	30.952	-1.05995	0.00078248	0.0196203	0.0199299	down
																Gh_A13G1619	40.9104	92.9172	-1.04225	2.27e-05	1.87e-06	2.25e-06	down
																Gh_A11G1906	17.1205	38.7202	-1.05858	1.19e-05	0.00609059	0.00603974	down
																Gh_D09G2039	16.7697	38.634	-1.05858	1.19e-05	0.00609059	0.00603974	down
																Gh_D10G2190	16.4703	36.1417	-1.05046	1.33e-05	0.00944648	0.00950672	down
																Gh_D12G0195	25.0254	56.2623	-1.03696	8.93e-09	0.000542017	0.000582121	down
																Gh_D13G2513	39.6719	89.6438	-1.03056	1.44e-05	3.73e-06	4.63e-06	down
																Gh_D13G0247	42.2531	94.5187	-1.03818	3.45e-05	1.49e-06	1.83e-06	down
																Gh_A04G1482	34.8573	77.7465	-1.01676	1.47e-06	2.95e-05	3.62e-05	down
																Gh_D05G0282	18.628	42.6333	-1.03898	5.99e-05	0.00399823	0.0041041	down
																Gh_D05G2425	18.8495	42.6152	-1.03898	5.99e-05	0.00399823	0.0041041	down
																Gh_A09G2379	22.6322	52.4922	-1.05132	4.13e-05	0.000845372	0.000874108	down
																Gh_D06G1791	23.957	54.0388	-1.04386	0.000176608	0.000679955	0.000712477	down
																Gh_A09G1757	17.2005	38.3988	-1.03996	7.48e-05	0.00762325	0.00781154	down
																Gh_A13G0393	30.8705	68.3991	-1.00448	0.000110232	0.00014494	0.000172993	down
																Gh_D01G0733	32.1486	70.267	-1.00019	7.68e-05	0.000116083	0.000142088	down
																Gh_A09G1397	28.6235	64.3861	-1.01389	2.22e-05	0.000223889	0.000261633	down
																Gh_D12G1235	36.9493	81.654	-1.00874	7.2e-06	1.88e-05	2.4e-05	down
																Gh_D13G0202	23.9643	53.7478	-1.03056	1.04e-08	0.000857531	0.000919759	down
																Gh_D12G0543	34.5406	75.9597	-1.00004	5.19e-05	5.26e-05	6.63e-05	down
																Gh_A01G1586	19.0004	42.4055	-1.0221	5.09e-05	0.00494635	0.00525765	down
																Gh_D02G0405	18.9661	42.0832	-1.0221	5.09e-05	0.00494635	0.00525765	down
																Gh_D03G0811	19.0868	42.1685	-1.0221	5.09e-05	0.00494635	0.00525765	down
																Gh_A07G0031	21.826	49.3683	-1.03056	7.23e-06	0.00166308	0.00175278	down
																Gh_A11G1316	41.3623	90.809	-1.01088	4.58e-07	4.81e-06	6.27e-06	down
																Gh_D05G1620	20.8061	46.7967	-1.02291	5.26e-05	0.002587	0.00276407	down
																Gh_D13G2073	21.0459	46.7904	-1.02291	5.26e-05	0.002587	0.00276407	down
																Gh_A02G0819	41.6708	93.0646	-1.01522	3.61e-05	3.02e-06	3.97e-06	down
																Gh_A10G1847	15.2359	33.4373	-1.01984	8.51e-05	0.0177898	0.0189044	down
																Gh_D07G0263	15.3248	33.0095	-1.01984	8.51e-05	0.0177898	0.0189044	down
																Gh_A07G1603	12.8091	28.98	-1.01818	0.000142516	0.0340221	0.0352291	down
																Gh_A11G2919	13.0548	28.829	-1.01818	0.000142516	0.0340221	0.0352291	down
																Gh_D11G2552	13.4244	28.6372	-1.01818	0.000142516	0.0340221	0.0352291	down
																Gh_D09G0146	21.4124	46.4818	-1.00748	8.3e-06	0.00324492	0.00349752	down
																Gh_A05G3996	42.0547	92.7994	-1.00748	2.52e-05	3.81e-06	5.07e-06	down
																Gh_A03G1770	16.7158	37.3277	-1.00199	3.41e-05	0.0117969	0.0127137	down
																Gh_A08G0694	17.1501	37.377	-1.00199	3.41e-05	0.0117969	0.0127137	down
																Gh_D08G1585	21.6293	48.0086	-1.00112	7.78e-06	0.00261048	0.00288319	down
