# Supplementary material for: Genome-wide analysis of PRR gene family uncovers their roles in circadian rhythmic changes and response to drought stress in Gossypium hirsutum L
Source: PeerJ. 2020 Sep 25;8:e9936. doi: 10.7717/peerj.9936 (PMC7521341; doi:10.7717/peerj.9936)
Supplement: Supplemental Information 11 [file peerj-08-9936-s011.xlsx]

## Sheet:  Suppl Table S6
Table S8: The FPKM value of GhPRR genes with PEG treated at 0, 1, 3 and 6 h.
	CK	PEG_01h	PEG_03h	PEG_06h
GhPRR1a	13.8419	3.86773	6.36837	17.4807
GhPRR1b	15.1611	9.87642	7.47786	12.7182
GhPRR3a	38.9252	21.0799	60.8058	83.7757
GhPRR3b	5.20884	2.0146	2.62373	11.1233
GhPRR3c	30.0025	17.2722	42.9847	70.4657
GhPRR3d	10.4753	5.27482	8.52191	18.0772
GhPRR5a	3.32187	1.71542	3.79405	17.3174
GhPRR5b	12.829	7.52883	14.319	29.5336
GhPRR5c	3.20194	0.807109	3.10861	15.6504
GhPRR5d	14.7234	8.62244	16.9027	36.6124
GhPRR7a	6.96743	6.64164	10.4127	12.3355
GhPRR7b	6.62362	8.40694	14.3601	9.36423
GhPRR7c	7.21437	3.34466	11.2465	15.0584
GhPRR7d	4.30322	7.49509	7.35698	3.23903
GhPRR9a	13.6328	26.1856	24.226	15.3319
GhPRR9b	12.0708	34.6319	24.8673	12.4917
