# Supplementary material for: Genome-wide analysis of PRR gene family uncovers their roles in circadian rhythmic changes and response to drought stress in Gossypium hirsutum L
Source: PeerJ. 2020 Sep 25;8:e9936. doi: 10.7717/peerj.9936 (PMC7521341; doi:10.7717/peerj.9936)
Supplement: Supplemental Information 12 [file peerj-08-9936-s012.xlsx]

## Sheet: Sheet1
Table S9:Details of GhPRR cluster analysis
Cluster1	Cluster2	Cluster3
GhPRR3a	GhPRR1a	GhPRR7a
GhPRR3c	GhPRR1b	GhPRR7b
GhPRR5a	GhPRR3b	GhPRR7d
GhPRR5b	GhPRR3d	GhPRR9a
GhPRR5c	GhPRR7c	GhPRR9b
GhPRR5d
