# Supplementary material for: Genome-wide analysis of PRR gene family uncovers their roles in circadian rhythmic changes and response to drought stress in Gossypium hirsutum L
Source: PeerJ. 2020 Sep 25;8:e9936. doi: 10.7717/peerj.9936 (PMC7521341; doi:10.7717/peerj.9936)
Supplement: Supplemental Information 13 — Rep-1,2,3 refers biological replicate, respectively. [file peerj-08-9936-s013.xlsx]

## Sheet: Sheet1
Table S10: The Ct value of qPCR raw data in Fig.5.
Rep-1,2,3 refers biological replicate,respectively.
	Actin			GhPRR1a			GhPRR1b			GhPRR3a			GhPRR3b			GhPRR3c			GhPRR3d			GhPRR5a			GhPRR5b			GhPRR5c			GhPRR5d			GhPRR7a			GhPRR7b			GhPRR7c			GhPRR7d			GhPRR9a			GhPRR9b
	Rep-1	Rep-2	Rep-3	Rep-1	Rep-2	Rep-3	Rep-1	Rep-2	Rep-3	Rep-1	Rep-2	Rep-3	Rep-1	Rep-2	Rep-3	Rep-1	Rep-2	Rep-3	Rep-1	Rep-2	Rep-3	Rep-1	Rep-2	Rep-3	Rep-1	Rep-2	Rep-3	Rep-1	Rep-2	Rep-3	Rep-1	Rep-2	Rep-3	Rep-1	Rep-2	Rep-3	Rep-1	Rep-2	Rep-3	Rep-1	Rep-2	Rep-3	Rep-1	Rep-2	Rep-3	Rep-1	Rep-2	Rep-3	Rep-1
0h CK	22.84	22.77	22.74	33.49	33.44	33.5	26.8	26.81	26.66	27.18	27.07	26.97	26.97	27.05	27.17	27.15	26.9	26.7	26.78	26.16	26.23	33.83	33.83	33.71	30.7	30.43	30.8	32.65	32.67	32.58	30.06	30.64	30.83	30.07	30.29	30.49	27.44	27.64	27.79	32.29	32.26	32.24	29.8	29.83	29.93	28.01	28.22	28.41	29.95
0h PEG	22.84	22.77	22.74	33.49	33.44	33.5	26.8	26.81	26.66	27.18	27.07	26.97	26.97	27.05	27.17	27.15	26.9	26.7	26.78	26.16	26.23	33.83	33.73	33.71	30.7	30.43	30.8	32.65	32.67	32.58	30.06	30.64	30.83	30.07	30.29	30.49	27.44	27.64	27.79	32.29	32.26	32.24	29.8	29.83	29.93	28.01	28.22	28.41	29.95
1h CK	21.7845	21.651	21.5976	31.6067	31.235	31.6642	26.4102	26.2789	26.3769	27.1702	27.2959	27.412	27.05	27.17	27.15	26.9	26.7	26.78	26.16	26.23	26.24	30.2979	30.2514	30.2853	26.975	26.9322	26.7136	28.8266	28.9471	28.9285	26.9633	26.757	26.8445	26.9633	26.757	26.8445	25.6694	25.565	25.458	29.3571	29.4947	29.7759	28.5091	28.6771	28.3826	25.6159	25.6892	25.7519	28.4672
1h PEG	21.39	21.46	21.62	32.68	32.97	32.86	26.7	26.64	26.63	27.03	27.06	27.14	28.26	28.57	29.3	25.45	25.54	25.59	26.8	26.7	26.55	30.72	30.81	30.73	28.45	28.61	28.77	31.34	31.24	31.15	29.12	29.2	28.73	29.4	29.47	29.41	28.33	28.14	28.29	30.87	30.56	30.5	32.28	32.17	32.27	28.26	28.19	28.09	29.27
3h CK	21.1255	21.1617	21.2072	32.8421	32.7165	32.9034	25.7027	25.8265	25.9353	25.58	25.44	25.53	25.912	25.9361	25.8079	24.7545	24.8719	24.7805	25.8325	25.8973	25.3877	30.7801	30.6143	30.5869	27.31	27.18	27.21	29.65	29.54	29.37	27.04	27.02	26.95	27.8578	27.9323	27.82	25.55	25.7004	25.4974	28.4847	28.6275	28.8558	27.9142	27.9414	27.8735	25.9735	25.9728	26.1882	28.638
3h PEG	20.63	20.31	20.41	31.99	31.86	31.98	25.66	25.38	25.44	24.653	24.5044	24.4658	26.54	26.34	26.42	26.52	26.21	26.13	25.52	25.65	25.72	29.63	29.55	29.84	27.8111	27.71	27.5302	28.4646	28.3385	28.2721	26.8578	26.6323	26.82	29.05	28.8	28.97	25.53	25.71	25.27	29.82	29.37	29.36	28.46	28.41	29.15	26.13	26.05	26.13	28.38
6h CK	21.937	21.9612	21.7985	32.9413	32.9735	33.0134	26.7636	26.7144	26.5182	25.7	25.61	25.48	26.6773	26.1835	26.4518	25.9398	25.9147	25.9196	25.7922	25.8131	25.9283	31.1048	31.0465	31.0239	28.27	28.01	28.47	31.73	31.28	31.24	28.28	28.55	28.41	28.6974	28.9406	28.7409	27.9235	27.9281	27.9369	29.1545	29.1209	29.2985	29.9625	29.5707	29.7003	28.6171	28.6424	28.748	29.9727
6h PEG	21.7	21.72	21.96	33.06	33.12	33.05	27.79	27.72	27.67	24.0515	23.9428	23.9033	28.5	28.13	27.64	23.45	23.63	23.68	26.18	26.3	26.43	30.28	30.35	30.47	27.8791	27.9646	27.7117	29.9245	29.9229	29.9309	27.6974	27.7406	27.9409	29.66	29.48	29.52	26.49	26.48	26.54	30.53	30.32	30.64	29.63	29.44	30.6	30.01	30.46	30.13	32.49
[truncated: 2 more columns]
